# Supplementary material for: The role of interspecies recombination in the evolution of antibiotic-resistant pneumococci
Source: eLife. 2021 Jul 14;10:e67113. doi: 10.7554/eLife.67113 (PMC8321556; doi:10.7554/eLife.67113)
Supplement: Figure 1—source data 1. — For each S. pneumoniae isolate sequenced as part of this study, accession codes are provided for the samples, sequence reads, and annotated assemblies. The same data are amalgamated for all previously published sequences analyzed in this study, where available. Where possible, the assembled data were used to assign isolates to a multi-locus sequence type and a global pneumococcal sequence cluster (GPSC). Resistance to trimethoprim, sulfamethoxazole, and penicillin, and the presence of the Tn1207.1-type and Tn916-type elements, were inferred for all isolates using the approaches described in the Materials and methods. [file elife-67113-fig1-data1.xlsx]

## Sheet: figure 1 - table supplement 1
Sample name	Sample accession code	Raw data acccession code	Sequence assembly accession code	Sequence data ID	GPSC	Study	Country	Continent	Multi-locus sequence type	Trimethoprim resistance phenotype	Sulfamethoxazole resistance phenotype	Penicillin resistance phenotype	Tn1207.1	Tn916	PMEN lineage
SPN8206	ERS069346	ERR052327	GCA_907169115	6551_7#7	6	This study	Belgium	Europe	1569	Resistant	Resistant	Resistant	Absent	Present	PMEN3
SPN8214	ERS069398	ERR052469	GCA_907169205	6570_3#16	6	This study	Belgium	Europe	1569	Resistant	Resistant	Resistant	Absent	Present	PMEN3
LMG217	ERS068585	ERR051803	GCA_907166955	5789_1#1	6	This study	Brazil	South America	156	Resistant	Resistant	Resistant	Absent	Absent	PMEN3
LMG226	ERS068586	ERR051804	GCA_907166965	5789_1#2	6	This study	Brazil	South America	156	Resistant	Resistant	Resistant	Absent	Absent	PMEN3
LMG228	ERS068587	ERR051805	GCA_907166995	5789_1#3	6	This study	Brazil	South America	156	Resistant	Resistant	Resistant	Absent	Absent	PMEN3
LMG230	ERS068588	ERR051806	GCA_907166985	5789_1#4	6	This study	Brazil	South America	156	Resistant	Resistant	Resistant	Absent	Absent	PMEN3
LMG232	ERS068589	ERR051807	GCA_907167005	5789_1#5	6	This study	Brazil	South America	156	Resistant	Resistant	Resistant	Absent	Absent	PMEN3
LMG235	ERS068590	ERR051808	GCA_907167025	5789_1#6	6	This study	Brazil	South America	156	Resistant	Resistant	Resistant	Absent	Absent	PMEN3
LMG244	ERS068591	ERR051809	GCA_907168505	5789_1#7	6	This study	Brazil	South America	156	Resistant	Resistant	Resistant	Present	Absent	PMEN3
LMG248	ERS068592	ERR051810	GCA_907167015	5789_1#8	6	This study	Brazil	South America	156	Resistant	Resistant	Resistant	Absent	Absent	PMEN3
LMG250	ERS068593	ERR051811	GCA_907167045	5789_1#9	6	This study	Brazil	South America	156	Resistant	Resistant	Resistant	Absent	Absent	PMEN3
LMG259	ERS068594	ERR051812	GCA_907166945	5789_1#10	6	This study	Brazil	South America	156	Resistant	Resistant	Resistant	Absent	Absent	PMEN3
LMG260	ERS068595	ERR051813	GCA_907166975	5789_1#11	6	This study	Brazil	South America	156	Resistant	Resistant	Resistant	Absent	Absent	PMEN3
LMG171	ERS068569	ERR051906	GCA_907167165	6187_4#20	6	This study	Brazil	South America	156	Resistant	Resistant	Resistant	Absent	Absent	PMEN3
LMG172	ERS068570	ERR051907	GCA_907167185	6187_4#21	6	This study	Brazil	South America	156	ND	ND	Resistant	Absent	Absent	PMEN3
LMG189	ERS068572	ERR051908	GCA_907167205	6187_4#22	6	This study	Brazil	South America	156	Resistant	Resistant	Resistant	Absent	Absent	PMEN3
LMG194	ERS068574	ERR051909	GCA_907167195	6187_4#23	6	This study	Brazil	South America	156	Resistant	Resistant	Resistant	Absent	Absent	PMEN3
LMG196	ERS068575	ERR051910	GCA_907167235	6187_5#1	6	This study	Brazil	South America	156	Resistant	Resistant	Resistant	Absent	Absent	PMEN3
LMG200	ERS068577	ERR051911	GCA_907167255	6187_5#2	6	This study	Brazil	South America	156	Resistant	Resistant	Resistant	Absent	Absent	PMEN3
LMG215	ERS068583	ERR051912	GCA_907167305	6187_5#3	6	This study	Brazil	South America	156	Resistant	Resistant	Resistant	Absent	Absent	PMEN3
LMG363	ERS068603	ERR051915	GCA_907167295	6187_5#6	6	This study	Brazil	South America	156	Resistant	Resistant	Resistant	Absent	Absent	PMEN3
LMG162	ERS068567	ERR052005	GCA_907167605	6246_2#5	6	This study	Brazil	South America	156	Resistant	Resistant	Resistant	Absent	Absent	PMEN3
LMG188	ERS068571	ERR052006	GCA_907167615	6246_2#6	6	This study	Brazil	South America	156	Resistant	Resistant	Resistant	Absent	Absent	PMEN3
LMG192	ERS068573	ERR052007	GCA_907167625	6246_2#7	6	This study	Brazil	South America	156	Resistant	Resistant	Resistant	Absent	Absent	PMEN3
LMG199	ERS068576	ERR052008	GCA_907167635	6246_2#8	6	This study	Brazil	South America	156	Resistant	Resistant	Resistant	Absent	Absent	PMEN3
LMG201	ERS068578	ERR052009	GCA_907168805	6246_2#9	6	This study	Brazil	South America	156	Resistant	Resistant	Resistant	Present	Absent	PMEN3
LMG202	ERS068579	ERR052010	GCA_907167475	6246_2#10	6	This study	Brazil	South America	156	Resistant	Resistant	Resistant	Absent	Absent	PMEN3
LMG210	ERS068580	ERR052011	GCA_907167525	6246_2#11	6	This study	Brazil	South America	156	Resistant	Resistant	Resistant	Absent	Absent	PMEN3
LMG211	ERS068581	ERR052012	GCA_907167515	6246_2#12	6	This study	Brazil	South America	156	Resistant	Resistant	Resistant	Absent	Absent	PMEN3
LMG216	ERS068584	ERR052013	GCA_907167535	6246_2#13	6	This study	Brazil	South America	156	Resistant	Resistant	Resistant	Absent	Absent	PMEN3
CRO9	ERS068883	ERR051887	GCA_907168705	6187_4#1	6	This study	Croatia	Europe	156	Resistant	Resistant	Resistant	Present	Absent	PMEN3
LMG371	ERS068604	ERR051916	GCA_907169095	6187_5#7	6	This study	Egypt	Africa	8488	Resistant	Resistant	Resistant	Absent	Present	PMEN3
30_PMEN3	ERS068870	ERR051884	GCA_907167155	5901_7#10	6	This study	France	Europe	156	Resistant	Resistant	Resistant	Absent	Absent	PMEN3
SPN9180	ERS069352	ERR052333	GCA_907167805	6551_7#13	6	This study	France	Europe	156	Resistant	Resistant	Resistant	Absent	Absent	PMEN3
SPN11878	ERS069363	ERR052435	GCA_907169175	6570_2#3	6	This study	France	Europe	1569	Resistant	Resistant	Resistant	Absent	Present	PMEN3
SPN11900	ERS069365	ERR052437	GCA_907169195	6570_2#5	6	This study	France	Europe	156	Resistant	Resistant	Resistant	Absent	Present	PMEN3
SN11893	ERS036304	ERR052503	GCA_907169225	6711_1#5	6	This study	France	Europe	156	Resistant	Resistant	Resistant	Absent	Present	PMEN3
LMG707	ERS068613	ERR051923	GCA_907167265	6187_5#14	6	This study	Germany	Europe	156	Resistant	Resistant	Resistant	Absent	Absent	PMEN3
SPN742	ERS069340	ERR052321	GCA_907167795	6551_7#1	6	This study	Germany	Europe	156	Resistant	Resistant	Resistant	Absent	Absent	PMEN3
SPN726	ERS069341	ERR052322	GCA_907167815	6551_7#2	6	This study	Germany	Europe	156	Resistant	Resistant	Resistant	Absent	Absent	PMEN3
SPN792	ERS069342	ERR052323	GCA_907167835	6551_7#3	6	This study	Germany	Europe	156	Resistant	Sensitive	Resistant	Absent	Absent	PMEN3
SPN772	ERS069343	ERR052324	GCA_907167845	6551_7#4	6	This study	Germany	Europe	1357	Resistant	Resistant	Resistant	Absent	Absent	PMEN3
SPN1110	ERS069345	ERR052326	GCA_907167865	6551_7#6	6	This study	Germany	Europe	1556	Resistant	Resistant	Resistant	Absent	Absent	PMEN3
SPN5441	ERS069347	ERR052328	GCA_907169125	6551_7#8	6	This study	Germany	Europe	1569	Resistant	Resistant	Resistant	Absent	Present	PMEN3
SPN456	ERS069348	ERR052329	GCA_907167875	6551_7#9	6	This study	Germany	Europe	156	Resistant	Resistant	Resistant	Absent	Absent	PMEN3
SPN485	ERS069349	ERR052330	GCA_907168825	6551_7#10	6	This study	Germany	Europe	156	Resistant	Resistant	Resistant	Present	Absent	PMEN3
SPN4705	ERS069351	ERR052332	GCA_907167825	6551_7#12	6	This study	Germany	Europe	162	Sensitive	Sensitive	Sensitive	Absent	Absent	PMEN3
SPN825	ERS069327	ERR271796	GCA_907168775	6569_6#10	6	This study	Germany	Europe	156	Resistant	Resistant	Resistant	Present	Absent	PMEN3
SPN1069	ERS069328	ERR271797	GCA_907168855	6569_6#11	6	This study	Germany	Europe	156	Resistant	Resistant	Resistant	Present	Absent	PMEN3
SPN1147	ERS069329	ERR271798	GCA_907167995	6569_6#12	6	This study	Germany	Europe	156	Resistant	Resistant	Resistant	Absent	Absent	PMEN3
SPN892	ERS069333	ERR271802	GCA_907168015	6569_6#16	6	This study	Germany	Europe	156	Resistant	Resistant	Resistant	Absent	Absent	PMEN3
SPN919	ERS069334	ERR271803	GCA_907168025	6569_6#17	6	This study	Germany	Europe	156	Resistant	Resistant	Resistant	Absent	Absent	PMEN3
SPN4089	ERS069337	ERR271806	GCA_907168055	6569_6#20	6	This study	Germany	Europe	162	Sensitive	Sensitive	Sensitive	Absent	Absent	PMEN3
SPN4797	ERS069338	ERR271807	GCA_907168075	6569_6#21	6	This study	Germany	Europe	162	Resistant	Resistant	Sensitive	Absent	Absent	PMEN3
SPN338	ERS069339	ERR271808	GCA_907168035	6569_6#22	6	This study	Germany	Europe	334	Resistant	Resistant	Resistant	Absent	Absent	PMEN3
SPN19846	ERS069370	ERR052442	GCA_907168045	6570_2#10	6	This study	Germany	Europe	156	Resistant	Resistant	Resistant	Absent	Absent	PMEN3
SPN20657	ERS069373	ERR052445	GCA_907168095	6570_2#13	6	This study	Germany	Europe	162	Sensitive	Sensitive	Sensitive	Absent	Absent	PMEN3
SPN20877	ERS069375	ERR052447	GCA_907168875	6570_2#15	6	This study	Germany	Europe	162	Sensitive	Sensitive	Sensitive	Present	Absent	PMEN3
SPN22577	ERS069378	ERR052450	GCA_907168925	6570_2#18	6	This study	Germany	Europe	162	Resistant	Resistant	Sensitive	Present	Absent	PMEN3
SPN22764	ERS069383	ERR052455	GCA_907168955	6570_3#2	6	This study	Germany	Europe	162	Resistant	Resistant	Sensitive	Present	Absent	PMEN3
SPN22997	ERS069386	ERR052458	GCA_907169025	6570_3#5	6	This study	Germany	Europe	162	Sensitive	Sensitive	Sensitive	Present	Absent	PMEN3
SPN23033	ERS069387	ERR052459	GCA_907168995	6570_3#6	6	This study	Germany	Europe	162	Sensitive	Sensitive	Sensitive	Present	Absent	PMEN3
SPN23066	ERS069388	ERR052460	GCA_907168985	6570_3#7	6	This study	Germany	Europe	162	Sensitive	Sensitive	Sensitive	Present	Absent	PMEN3
SPN1039	ERS069391	ERR052463	GCA_907168125	6570_3#10	6	This study	Germany	Europe	165	Sensitive	Resistant	Sensitive	Absent	Absent	PMEN3
SPN1117	ERS069397	ERR052468	GCA_907168915	6570_3#15	6	This study	Germany	Europe	1557	Resistant	Resistant	Resistant	Present	Absent	PMEN3
SPN6062	ERS069399	ERR052470	GCA_907168965	6570_3#17	6	This study	Germany	Europe	162	Sensitive	Sensitive	Sensitive	Present	Absent	PMEN3
SN27608	ERS036320	ERR055600	GCA_907168145	6678_3#1	6	This study	Germany	Europe	156	ND	ND	Resistant	Absent	Absent	PMEN3
SN27774	ERS036322	ERR055602	GCA_907168195	6678_3#3	6	This study	Germany	Europe	162	Sensitive	Sensitive	Sensitive	Absent	Absent	PMEN3
SN28145	ERS036323	ERR055603	GCA_907169005	6678_3#4	6	This study	Germany	Europe	162	Sensitive	Sensitive	Sensitive	Present	Absent	PMEN3
SN28165	ERS036324	ERR055604	GCA_907169215	6678_3#5	6	This study	Germany	Europe	156	Resistant	Resistant	Resistant	Absent	Present	PMEN3
SN28739	ERS036326	ERR055606	GCA_907169045	6678_3#7	6	This study	Germany	Europe	162	Sensitive	Sensitive	Sensitive	Present	Absent	PMEN3
SN29975	ERS036328	ERR055608	GCA_907169055	6678_3#9	6	This study	Germany	Europe	3811	Sensitive	Sensitive	Sensitive	Present	Absent	PMEN3
SN30983	ERS036330	ERR055610	GCA_907168135	6678_3#11	6	This study	Germany	Europe	156	Resistant	Resistant	Resistant	Absent	Absent	PMEN3
SN31443	ERS036331	ERR055611	GCA_907168185	6678_3#12	6	This study	Germany	Europe	156	ND	ND	Resistant	Absent	Absent	PMEN3
SN32871	ERS036335	ERR055615	GCA_907168975	6678_3#16	6	This study	Germany	Europe	162	Resistant	Resistant	Sensitive	Present	Absent	PMEN3
SN34679	ERS036338	ERR055618	GCA_907169035	6678_3#19	6	This study	Germany	Europe	162	Sensitive	Sensitive	Sensitive	Present	Absent	PMEN3
SN26594	ERS036315	ERR052514	GCA_907168225	6711_1#16	6	This study	Germany	Europe	162	Resistant	Sensitive	Sensitive	Absent	Absent	PMEN3
SN26622	ERS036316	ERR052515	GCA_907168245	6711_1#17	6	This study	Germany	Europe	162	Sensitive	Sensitive	Sensitive	Absent	Absent	PMEN3
SN26757	ERS036317	ERR052516	GCA_907168265	6711_1#18	6	This study	Germany	Europe	162	Sensitive	Sensitive	Sensitive	Absent	Absent	PMEN3
SN27555	ERS036319	ERR052518	GCA_907168275	6711_1#20	6	This study	Germany	Europe	156	Resistant	Resistant	Resistant	Absent	Absent	PMEN3
SN25177	ERS036310	ERR052529	GCA_907168235	6732_1#11	6	This study	Germany	Europe	156	Resistant	Resistant	Resistant	Absent	Absent	PMEN3
LMG952	ERS068646	ERR051816	GCA_907167065	5789_2#2	6	This study	New Zealand	Asia	156	Resistant	Resistant	Resistant	Absent	Absent	PMEN3
LMG959	ERS068647	ERR051817	GCA_907167085	5789_2#3	6	This study	New Zealand	Asia	156	Resistant	Resistant	Resistant	Absent	Absent	PMEN3
LMG961	ERS068648	ERR051818	GCA_907167095	5789_2#4	6	This study	New Zealand	Asia	156	Resistant	Resistant	Resistant	Absent	Absent	PMEN3
LMG962	ERS068649	ERR051819	GCA_907167075	5789_2#5	6	This study	New Zealand	Asia	156	Resistant	Resistant	Resistant	Absent	Absent	PMEN3
LMG970	ERS068650	ERR051820	GCA_907167125	5789_2#6	6	This study	New Zealand	Asia	156	Resistant	Resistant	Resistant	Absent	Absent	PMEN3
LMG913	ERS068639	ERR052028	GCA_907167715	6246_3#5	6	This study	New Zealand	Asia	156	Resistant	Resistant	Resistant	Absent	Absent	PMEN3
LMG933	ERS068641	ERR052030	GCA_907167745	6246_3#7	6	This study	New Zealand	Asia	156	Resistant	Resistant	Resistant	Absent	Absent	PMEN3
LMG941	ERS068643	ERR052031	GCA_907167735	6246_3#8	6	This study	New Zealand	Asia	156	Resistant	Resistant	Resistant	Absent	Absent	PMEN3
LMG944	ERS068644	ERR052032	GCA_907167725	6246_3#9	6	This study	New Zealand	Asia	156	Resistant	Resistant	Resistant	Absent	Absent	PMEN3
LMG1243	ERS068661	ERR052035	GCA_907167665	6246_3#12	6	This study	New Zealand	Asia	156	Resistant	Resistant	Resistant	Absent	Absent	PMEN3
LMG1245	ERS068662	ERR052036	GCA_907167675	6246_3#13	6	This study	New Zealand	Asia	156	Resistant	Resistant	Resistant	Absent	Absent	PMEN3
LMG1249	ERS068663	ERR052037	GCA_907167685	6246_3#14	6	This study	New Zealand	Asia	156	Resistant	Resistant	Resistant	Absent	Absent	PMEN3
LMG2210	ERS068746	ERR051952	GCA_907167365	6187_6#20	6	This study	Peru	South America	156	Resistant	Resistant	Resistant	Absent	Absent	PMEN3
LMG2260	ERS068759	ERR051956	GCA_907168765	6187_7#1	6	This study	Peru	South America	156	Resistant	Resistant	Resistant	Present	Absent	PMEN3
LMG2261	ERS068760	ERR051957	GCA_907167415	6187_7#2	6	This study	Peru	South America	156	Resistant	Resistant	Resistant	Absent	Absent	PMEN3
LMG2279	ERS068766	ERR051958	GCA_907167435	6187_7#3	6	This study	Peru	South America	156	Resistant	Resistant	Resistant	Absent	Absent	PMEN3
LMG2291	ERS068771	ERR051961	GCA_907167445	6187_7#6	6	This study	Peru	South America	156	Resistant	Resistant	Resistant	Absent	Absent	PMEN3
LMG2300	ERS068772	ERR051962	GCA_907167495	6187_7#7	6	This study	Peru	South America	156	Resistant	Resistant	Intermediate	Absent	Absent	PMEN3
LMG3384	ERS068798	ERR051969	GCA_907168795	6187_7#14	6	This study	Peru	South America	156	Resistant	Resistant	Resistant	Present	Absent	PMEN3
LMG3385	ERS068799	ERR051970	GCA_907167385	6187_7#15	6	This study	Peru	South America	156	Resistant	Resistant	Resistant	Absent	Absent	PMEN3
LMG2227	ERS068752	ERR271764	GCA_907167755	6246_4#1	6	This study	Peru	South America	156	Resistant	Resistant	Resistant	Absent	Absent	PMEN3
LMG2259	ERS068758	ERR271766	GCA_907167775	6246_4#3	6	This study	Peru	South America	156	Resistant	Resistant	Resistant	Absent	Absent	PMEN3
LMG2592	ERS068784	ERR271771	GCA_907167785	6246_4#8	6	This study	Peru	South America	156	Resistant	Resistant	Resistant	Absent	Absent	PMEN3
PT1683	ERS069288	ERR052403	GCA_907167855	6569_4#14	6	This study	Portugal	Europe	156	Resistant	Resistant	Resistant	Absent	Absent	PMEN3
PT2807	ERS069289	ERR052404	GCA_907169135	6569_4#15	6	This study	Portugal	Europe	2306	Resistant	Resistant	Resistant	Absent	Present	PMEN3
PT2737	ERS069290	ERR052405	GCA_907169165	6569_4#16	6	This study	Portugal	Europe	143	Sensitive	Resistant	Resistant	Absent	Present	PMEN3
PT3291	ERS069291	ERR052406	GCA_907169155	6569_4#17	6	This study	Portugal	Europe	143	Sensitive	Sensitive	Resistant	Absent	Present	PMEN3
PT3626	ERS069292	ERR052407	GCA_907169145	6569_4#18	6	This study	Portugal	Europe	143	Sensitive	Resistant	Resistant	Absent	Present	PMEN3
PT1570	ERS069293	ERR052408	GCA_907167895	6569_4#19	6	This study	Portugal	Europe	156	Resistant	Resistant	Resistant	Absent	Absent	PMEN3
DCC2508	ERS069294	ERR052409	GCA_907167905	6569_4#20	6	This study	Portugal	Europe	156	Resistant	Resistant	Resistant	Absent	Absent	PMEN3
PT338	ERS069295	ERR052410	GCA_907167885	6569_4#21	6	This study	Portugal	Europe	156	Resistant	Resistant	Resistant	Absent	Absent	PMEN3
PT5424	ERS069297	ERR052412	GCA_907167915	6569_5#1	6	This study	Portugal	Europe	156	Resistant	Resistant	Resistant	Absent	Absent	PMEN3
PT6251	ERS069298	ERR052413	GCA_907167925	6569_5#2	6	This study	Portugal	Europe	156	Resistant	Resistant	Resistant	Absent	Absent	PMEN3
PT6282	ERS069299	ERR052414	GCA_907167945	6569_5#3	6	This study	Portugal	Europe	156	Resistant	Resistant	Resistant	Absent	Absent	PMEN3
PT5825	ERS069300	ERR052415	GCA_907167935	6569_5#4	6	This study	Portugal	Europe	Novel	Resistant	Resistant	Resistant	Absent	Absent	PMEN3
PT5842	ERS069301	ERR052416	GCA_907167955	6569_5#5	6	This study	Portugal	Europe	Novel	Resistant	Resistant	Resistant	Absent	Absent	PMEN3
PT5858	ERS069302	ERR052417	GCA_907167985	6569_5#6	6	This study	Portugal	Europe	Novel	Resistant	Resistant	Resistant	Absent	Absent	PMEN3
PT4140	ERS069303	ERR052418	GCA_907169185	6569_5#7	6	This study	Portugal	Europe	162	Resistant	Resistant	Sensitive	Absent	Present	PMEN3
PT2533	ERS069304	ERR052419	GCA_907167965	6569_5#8	6	This study	Portugal	Europe	162	Sensitive	Sensitive	Sensitive	Absent	Absent	PMEN3
PT494	ERS069305	ERR052420	GCA_907167975	6569_5#9	6	This study	Portugal	Europe	162	Resistant	Resistant	Sensitive	Absent	Absent	PMEN3
SPN7667	ERS069332	ERR271801	GCA_907168005	6569_6#15	6	This study	Portugal	Europe	156	Resistant	Sensitive	Resistant	Absent	Absent	PMEN3
LMG423	ERS068607	ERR051918	GCA_907169265	6187_5#9	6	This study	Qatar	Asia	156	Resistant	Resistant	Resistant	Present	Present	PMEN3
LMG1001	ERS068652	ERR051822	GCA_907167115	5789_2#8	6	This study	South Africa	Africa	156	Resistant	Resistant	Resistant	Absent	Absent	PMEN3
LMG1215	ERS068660	ERR051931	GCA_907167275	6187_5#22	6	This study	South Africa	Africa	162	Resistant	Resistant	Sensitive	Absent	Absent	PMEN3
LMG695	ERS068612	ERR051922	GCA_907167245	6187_5#13	6	This study	Spain	Europe	156	Resistant	Sensitive	Resistant	Absent	Absent	PMEN3
LMG132	ERS068562	ERR052001	GCA_907167485	6246_2#1	6	This study	Spain	Europe	156	Resistant	Resistant	Resistant	Absent	Absent	PMEN3
LMG839	ERS068627	ERR052019	GCA_907167555	6246_2#19	6	This study	Spain	Europe	156	Resistant	Resistant	Resistant	Absent	Absent	PMEN3
LMG846	ERS068629	ERR052020	GCA_907167545	6246_2#20	6	This study	Spain	Europe	156	Resistant	Resistant	Resistant	Absent	Absent	PMEN3
LMG863	ERS068630	ERR052021	GCA_907167565	6246_2#21	6	This study	Spain	Europe	156	Resistant	Sensitive	Resistant	Absent	Absent	PMEN3
LMG865	ERS068631	ERR052022	GCA_907167585	6246_2#22	6	This study	Spain	Europe	156	Resistant	Resistant	Resistant	Absent	Absent	PMEN3
LMG1534	ERS068691	ERR052044	GCA_907167705	6246_3#21	6	This study	Spain	Europe	156	Resistant	Resistant	Resistant	Absent	Absent	PMEN3
SPN7588	ERS069326	ERR271795	GCA_907168065	6569_6#9	6	This study	Spain	Europe	156	Resistant	Sensitive	Resistant	Absent	Absent	PMEN3
SPN7586	ERS069331	ERR271800	GCA_907168935	6569_6#14	6	This study	Spain	Europe	156	Resistant	Resistant	Resistant	Present	Absent	PMEN3
LMG1297	ERS068669	ERR051933	GCA_907167325	6187_6#1	6	This study	Sweden	Europe	162	Sensitive	Sensitive	Sensitive	Absent	Absent	PMEN3
LMG1451	ERS068686	ERR051941	GCA_907167395	6187_6#9	6	This study	Sweden	Europe	162	Sensitive	Sensitive	Sensitive	Absent	Absent	PMEN3
LMG1463	ERS068687	ERR051942	GCA_907167315	6187_6#10	6	This study	Sweden	Europe	162	Sensitive	Sensitive	Sensitive	Absent	Absent	PMEN3
LMG1479	ERS068688	ERR051943	GCA_907167345	6187_6#11	6	This study	Sweden	Europe	1184	Sensitive	Sensitive	Intermediate	Absent	Absent	PMEN3
LMG1481	ERS068689	ERR051944	GCA_907167335	6187_6#12	6	This study	Sweden	Europe	1357	Resistant	Resistant	Resistant	Absent	Absent	PMEN3
LMG887	ERS068636	ERR052025	GCA_907167695	6246_3#2	6	This study	Sweden	Europe	162	Sensitive	Sensitive	Sensitive	Absent	Absent	PMEN3
SN11942	ERS036308	ERR052507	GCA_907169065	6711_1#9	6	This study	Switzerland	Europe	156	Resistant	Resistant	Resistant	Present	Absent	PMEN3
08B02945	ERS013969	ERR026947	GCA_907166885	5366_3#2	6	This study	Thailand	Asia	156	Resistant	Resistant	Resistant	Absent	Absent	PMEN3
08B02946	ERS013970	ERR026948	GCA_907166895	5366_3#3	NA	This study	Thailand	Asia	156	Resistant	Resistant	Resistant	Absent	Absent	PMEN3
08B05712	ERS013982	ERR026961	GCA_907166905	5366_5#3	6	This study	Thailand	Asia	156	Resistant	Resistant	Resistant	Absent	Absent	PMEN3
08B05713	ERS013983	ERR026962	GCA_907166865	5366_5#4	6	This study	Thailand	Asia	156	Resistant	Resistant	Resistant	Absent	Absent	PMEN3
09B00632	ERS014018	ERR027000	GCA_907166855	5366_8#3	6	This study	Thailand	Asia	156	Resistant	Resistant	Resistant	Absent	Absent	PMEN3
K11_061	ERS015854	ERR028802	GCA_907169105	5468_2#4	6	This study	Thailand	Asia	166	Resistant	Resistant	Resistant	Absent	Present	PMEN3
LMG764	ERS068615	ERR051925	GCA_907167285	6187_5#16	6	This study	Thailand	Asia	156	Resistant	Resistant	Resistant	Absent	Absent	PMEN3
LMG1695	ERS068716	ERR051947	GCA_907167375	6187_6#15	6	This study	Thailand	Asia	156	Resistant	Resistant	Resistant	Absent	Absent	PMEN3
DG_97	ERS068905	ERR051892	GCA_907167225	6187_4#6	6	This study	Turkey	Europe	156	Resistant	Resistant	Resistant	Absent	Absent	PMEN3
GH_04	ERS068907	ERR051893	GCA_907167215	6187_4#7	6	This study	Turkey	Europe	156	Resistant	Resistant	Resistant	Absent	Absent	PMEN3
BS_20	ERS068877	ERR051973	GCA_907167425	6187_7#18	6	This study	Turkey	Europe	156	Resistant	Resistant	Resistant	Absent	Absent	PMEN3
DE_05	ERS068885	ERR051977	GCA_907167455	6187_7#22	6	This study	Turkey	Europe	156	Resistant	Resistant	Resistant	Absent	Absent	PMEN3
DE_13	ERS068888	ERR051979	GCA_907167505	6237_8#1	6	This study	Turkey	Europe	156	Resistant	Resistant	Resistant	Absent	Absent	PMEN3
MA_03	ERS068908	ERR051986	GCA_907167465	6237_8#8	NA	This study	Turkey	Europe	156	Resistant	Resistant	Resistant	Absent	Present	PMEN3
MA_20	ERS068911	ERR051987	GCA_907168815	6237_8#9	NA	This study	Turkey	Europe	156	Resistant	Resistant	Resistant	Present	Absent	PMEN3
LMG140	ERS068566	ERR052004	GCA_907167595	6246_2#4	6	This study	Turkey	Europe	156	Resistant	Resistant	Resistant	Absent	Absent	PMEN3
LMG3	ERS068549	ERR051791	GCA_907166915	5749_6#1	6	This study	UK	Europe	162	Sensitive	Sensitive	Sensitive	Absent	Absent	PMEN3
LMG77	ERS068553	ERR051795	GCA_907168515	5749_6#5	6	This study	USA	North America	156	Resistant	Resistant	Resistant	Present	Absent	PMEN3
LMG85	ERS068555	ERR051797	GCA_907168495	5749_6#7	6	This study	USA	North America	156	Resistant	Resistant	Resistant	Present	Absent	PMEN3
LMG94	ERS068558	ERR051800	GCA_907168565	5749_6#10	6	This study	USA	North America	156	Resistant	Resistant	Resistant	Present	Absent	PMEN3
LMG1049	ERS068655	ERR051825	GCA_907167055	5789_2#11	6	This study	USA	North America	156	Resistant	Resistant	Resistant	Absent	Absent	PMEN3
LMG1053	ERS068656	ERR051826	GCA_907167035	5789_2#12	6	This study	USA	North America	156	Resistant	Resistant	Resistant	Absent	Absent	PMEN3
1042-00	ERS068805	ERR051831	GCA_907167105	5901_2#5	6	This study	USA	North America	156	Resistant	Resistant	Sensitive	Absent	Absent	PMEN3
1965-00	ERS068808	ERR051834	GCA_907169085	5901_2#8	6	This study	USA	North America	166	Resistant	Resistant	Resistant	Absent	Present	PMEN3
3224-06	ERS068812	ERR051838	GCA_907168535	5901_2#12	6	This study	USA	North America	156	Resistant	Resistant	Resistant	Present	Absent	PMEN3
4865-07	ERS068826	ERR051840	GCA_907168555	5901_3#2	6	This study	USA	North America	4181	Resistant	Resistant	Resistant	Present	Absent	PMEN3
5351-00	ERS068832	ERR051846	GCA_907168545	5901_3#8	6	This study	USA	North America	156	Resistant	Resistant	Resistant	Present	Absent	PMEN3
5653-05	ERS068833	ERR051847	GCA_907168595	5901_3#9	6	This study	USA	North America	156	Resistant	Resistant	Resistant	Present	Absent	PMEN3
5720-06	ERS068835	ERR051849	GCA_907168575	5901_3#11	6	This study	USA	North America	156	Resistant	Resistant	Resistant	Present	Absent	PMEN3
5759-07	ERS068836	ERR051850	GCA_907168525	5901_3#12	6	This study	USA	North America	4026	Resistant	Resistant	Resistant	Present	Absent	PMEN3
5761-05	ERS068837	ERR051851	GCA_907168645	5901_5#1	6	This study	USA	North America	156	Resistant	Resistant	Resistant	Present	Absent	PMEN3
6006-99	ERS068838	ERR051852	GCA_907167135	5901_5#2	6	This study	USA	North America	156	Resistant	Resistant	Resistant	Absent	Absent	PMEN3
6116-05	ERS068840	ERR051854	GCA_907168585	5901_5#4	6	This study	USA	North America	156	Resistant	Resistant	Resistant	Present	Absent	PMEN3
6316-07	ERS068841	ERR051855	GCA_907168635	5901_5#5	6	This study	USA	North America	2739	Resistant	Resistant	Resistant	Present	Absent	PMEN3
6365-07	ERS068842	ERR051856	GCA_907168625	5901_5#6	6	This study	USA	North America	4612	Resistant	Resistant	Sensitive	Present	Absent	PMEN3
6378-05	ERS068843	ERR051857	GCA_907168605	5901_5#7	6	This study	USA	North America	156	Resistant	Resistant	Resistant	Present	Absent	PMEN3
6470-03	ERS068845	ERR051859	GCA_907167175	5901_5#9	6	This study	USA	North America	162	Sensitive	Sensitive	Sensitive	Absent	Absent	PMEN3
6525-99	ERS068846	ERR051860	GCA_907168665	5901_5#10	6	This study	USA	North America	156	Resistant	Resistant	Resistant	Present	Absent	PMEN3
6560-01	ERS068848	ERR051862	GCA_907167145	5901_5#12	6	This study	USA	North America	156	Resistant	Resistant	Resistant	Absent	Absent	PMEN3
6656-07	ERS068850	ERR051864	GCA_907168615	5901_6#2	6	This study	USA	North America	4612	Resistant	Resistant	Resistant	Present	Absent	PMEN3
6850-04	ERS068851	ERR051865	GCA_907168745	5901_6#3	6	This study	USA	North America	2739	Sensitive	Resistant	Resistant	Present	Absent	PMEN3
6972-04	ERS068852	ERR051866	GCA_907168715	5901_6#4	6	This study	USA	North America	156	Resistant	Resistant	Resistant	Present	Absent	PMEN3
7347-06	ERS068854	ERR051868	GCA_907168695	5901_6#6	6	This study	USA	North America	2739	Resistant	Resistant	Resistant	Present	Absent	PMEN3
7464-06	ERS068856	ERR051870	GCA_907168735	5901_6#8	6	This study	USA	North America	Novel	Resistant	Resistant	Resistant	Present	Absent	PMEN3
7870-07	ERS068859	ERR051873	GCA_907168655	5901_6#11	6	This study	USA	North America	156	Resistant	Resistant	Resistant	Present	Absent	PMEN3
7898-07	ERS068861	ERR051875	GCA_907168755	5901_7#1	6	This study	USA	North America	4618	Resistant	Resistant	Resistant	Present	Absent	PMEN3
8571-07	ERS068865	ERR051879	GCA_907168675	5901_7#5	6	This study	USA	North America	156	Resistant	Resistant	Resistant	Present	Absent	PMEN3
8935-04	ERS068866	ERR051880	GCA_907168725	5901_7#6	6	This study	USA	North America	156	Resistant	Resistant	Resistant	Present	Absent	PMEN3
2008008784	ERS068868	ERR051882	GCA_907168685	5901_7#8	6	This study	USA	North America	2739	Resistant	Resistant	Resistant	Present	Absent	PMEN3
LMG1359	ERS068672	ERR051934	GCA_907167355	6187_6#2	6	This study	USA	North America	156	Resistant	Resistant	Resistant	Absent	Absent	PMEN3
LMG1362	ERS068673	ERR051935	GCA_907167405	6187_6#3	6	This study	USA	North America	156	Resistant	Resistant	Resistant	Absent	Absent	PMEN3
4050-00	ERS068820	ERR051971	GCA_907168835	6187_7#16	6	This study	USA	North America	156	Resistant	Resistant	Resistant	Present	Absent	PMEN3
LMG825	ERS068626	ERR052018	GCA_907167575	6246_2#18	6	This study	USA	North America	162	Sensitive	Resistant	Sensitive	Absent	Absent	PMEN3
LMG909	ERS068637	ERR052026	GCA_907168845	6246_3#3	6	This study	USA	North America	156	Resistant	Resistant	Resistant	Present	Absent	PMEN3
LMG1055	ERS068657	ERR052033	GCA_907167655	6246_3#10	6	This study	USA	North America	156	Resistant	Resistant	Resistant	Absent	Absent	PMEN3
LMG1090	ERS068659	ERR052034	GCA_907167645	6246_3#11	6	This study	USA	North America	156	Resistant	Resistant	Resistant	Absent	Absent	PMEN3
3343-08	ERS068815	ERR271777	GCA_907168785	6246_4#14	6	This study	USA	North America	4612	Resistant	Resistant	Resistant	Present	Absent	PMEN3
3919-05	ERS068819	ERR271781	GCA_907168865	6246_4#18	6	This study	USA	North America	2739	Resistant	Resistant	Resistant	Present	Absent	PMEN3
4070-00	ERS068821	ERR271782	GCA_907167765	6246_4#19	6	This study	USA	North America	156	Resistant	Resistant	Resistant	Absent	Absent	PMEN3
SPN1744	ERS069330	ERR271799	GCA_907168895	6569_6#13	6	This study			156	Resistant	Resistant	Resistant	Present	Absent	PMEN3
SPN1733	ERS069335	ERR271804	GCA_907168085	6569_6#18	6	This study			162	Resistant	Resistant	Sensitive	Absent	Absent	PMEN3
SPN20298	ERS069371	ERR052443	GCA_907168905	6570_2#11	6	This study			162	Resistant	Resistant	Resistant	Present	Absent	PMEN3
SPN20304	ERS069372	ERR052444	GCA_907168105	6570_2#12	6	This study			156	Resistant	Resistant	Resistant	Absent	Absent	PMEN3
SPN22579	ERS069379	ERR052451	GCA_907168115	6570_2#19	6	This study			162	Sensitive	Sensitive	Sensitive	Absent	Absent	PMEN3
SPN22721	ERS069381	ERR052453	GCA_907168885	6570_2#21	6	This study			156	Resistant	Resistant	Resistant	Present	Absent	PMEN3
SPN22836	ERS069385	ERR052457	GCA_907168945	6570_3#4	6	This study			162	Resistant	Resistant	Sensitive	Present	Absent	PMEN3
SN27685	ERS036321	ERR055601	GCA_907168175	6678_3#2	6	This study			156	Resistant	Resistant	Resistant	Absent	Absent	PMEN3
SN28439	ERS036325	ERR055605	GCA_907168215	6678_3#6	6	This study			156	Resistant	Resistant	Resistant	Absent	Absent	PMEN3
SN30764	ERS036329	ERR055609	GCA_907169015	6678_3#10	NA	This study			162	Sensitive	Sensitive	Sensitive	Present	Absent	PMEN3
SN31825	ERS036332	ERR055612	GCA_907168155	6678_3#13	6	This study			162	Resistant	Resistant	Sensitive	Present	Absent	PMEN3
SN31833	ERS036333	ERR055613	GCA_907168165	6678_3#14	6	This study			162	Resistant	Resistant	Sensitive	Absent	Absent	PMEN3
SN26587	ERS036313	ERR052512	GCA_907168205	6711_1#14	6	This study			156	Resistant	Resistant	Resistant	Absent	Absent	PMEN3
SN27543	ERS036318	ERR052517	GCA_907168255	6711_1#19	6	This study			163	Sensitive	Sensitive	Sensitive	Absent	Absent	PMEN3
SN26589	ERS036314	ERR052533	GCA_907169075	6732_1#15	6	This study			162	Resistant	Resistant	Sensitive	Present	Absent	PMEN3
LMG325	ERS068597	ERR051913	GCA_907172235	6187_5#4	18	This study	Brazil	South America	NA	Resistant	Resistant	Sensitive	Absent	Absent	PMEN9
HK01_0036	ERS015864	ERR028813	GCA_907169975	5477_6#3	18	This study	China	Asia	NA	Resistant	Resistant	Resistant	Absent	Present	PMEN9
HK01_0147	ERS015865	ERR028814	GCA_907169925	5477_6#4	18	This study	China	Asia	NA	Resistant	Resistant	Resistant	Absent	Present	PMEN9
CRO21	ERS068880	ERR051974	GCA_907170325	6187_7#19	18	This study	Croatia	Europe	NA	Resistant	Resistant	Resistant	Absent	Absent	PMEN9
CRO30	ERS068881	ERR051975	GCA_907170305	6187_7#20	18	This study	Croatia	Europe	NA	Resistant	Resistant	Resistant	Absent	Absent	PMEN9
CRO60	ERS068882	ERR051976	GCA_907170425	6187_7#21	18	This study	Croatia	Europe	NA	Resistant	Resistant	Resistant	Absent	Absent	PMEN9
LMG335	ERS068600	ERR052015	GCA_907170315	6246_2#15	18	This study	Croatia	Europe	NA	Resistant	Resistant	Resistant	Absent	Absent	PMEN9
LMG342	ERS068602	ERR051914	GCA_907170435	6187_5#5	18	This study	Finland	Europe	NA	Sensitive	Resistant	Sensitive	Absent	Absent	PMEN9
LMG686	ERS068609	ERR051919	GCA_907169995	6187_5#10	18	This study	Germany	Europe	NA	Resistant	Resistant	Resistant	Present	Absent	PMEN9
SN1723	ERS068955	ERR052051	GCA_907170725	6259_1#5	18	This study	Germany	Europe	NA	Sensitive	Sensitive	Sensitive	Absent	Absent	PMEN9
SN205	ERS068956	ERR052052	GCA_907170755	6259_1#6	18	This study	Germany	Europe	NA	Sensitive	Sensitive	Sensitive	Present	Absent	PMEN9
SN849	ERS068960	ERR052056	GCA_907170345	6259_1#10	18	This study	Germany	Europe	NA	Resistant	Resistant	Resistant	Absent	Absent	PMEN9
SN6058	ERS068961	ERR052057	GCA_907170635	6259_1#11	18	This study	Germany	Europe	NA	Sensitive	Sensitive	Sensitive	Present	Absent	PMEN9
SN3123	ERS068962	ERR052058	GCA_907170705	6259_1#12	18	This study	Germany	Europe	NA	Sensitive	Resistant	Sensitive	Absent	Present	PMEN9
SN1738	ERS068969	ERR052065	GCA_907170695	6259_1#19	18	This study	Germany	Europe	NA	Sensitive	Sensitive	Sensitive	Present	Absent	PMEN9
SN590	ERS068971	ERR052067	GCA_907170715	6259_1#21	18	This study	Germany	Europe	NA	Sensitive	Sensitive	Sensitive	Absent	Absent	PMEN9
SN5992	ERS068972	ERR052068	GCA_907170735	6259_1#22	18	This study	Germany	Europe	NA	Sensitive	Sensitive	Sensitive	Present	Absent	PMEN9
SN6064	ERS068976	ERR052072	GCA_907170815	6259_2#4	18	This study	Germany	Europe	NA	Sensitive	Sensitive	Sensitive	Present	Absent	PMEN9
SN1560	ERS068977	ERR052073	GCA_907170825	6259_2#5	18	This study	Germany	Europe	NA	Sensitive	Sensitive	Sensitive	Present	Absent	PMEN9
SN81	ERS068978	ERR052074	GCA_907172135	6259_2#6	18	This study	Germany	Europe	NA	Sensitive	Sensitive	Sensitive	Present	Absent	PMEN9
SN6149	ERS068981	ERR052077	GCA_907170835	6259_2#9	18	This study	Germany	Europe	NA	Sensitive	Resistant	Sensitive	Absent	Absent	PMEN9
SN4996	ERS068982	ERR052078	GCA_907170405	6259_2#10	18	This study	Germany	Europe	NA	Sensitive	Sensitive	Resistant	Present	Absent	PMEN9
SN4897	ERS068983	ERR052079	GCA_907172165	6259_2#11	18	This study	Germany	Europe	NA	Sensitive	Sensitive	Sensitive	Present	Absent	PMEN9
SN6079	ERS068986	ERR052082	GCA_907170745	6259_2#14	18	This study	Germany	Europe	NA	Sensitive	Sensitive	Sensitive	Present	Absent	PMEN9
SN6074	ERS068989	ERR052085	GCA_907170765	6259_2#17	18	This study	Germany	Europe	NA	Resistant	Resistant	Sensitive	Present	Present	PMEN9
SN6051	ERS068993	ERR052089	GCA_907170775	6259_2#21	18	This study	Germany	Europe	NA	Sensitive	Sensitive	Sensitive	Present	Absent	PMEN9
SN41911	ERS069019	ERR052115	GCA_001168465	6259_4#3	18	This study	Germany	Europe	NA	Sensitive	Sensitive	Sensitive	Present	Absent	PMEN9
SN4151	ERS069021	ERR052117	GCA_907170785	6259_4#5	18	This study	Germany	Europe	NA	Sensitive	Resistant	Sensitive	Absent	Present	PMEN9
SN268	ERS069032	ERR052128	GCA_907172175	6259_4#16	18	This study	Germany	Europe	NA	Sensitive	Sensitive	Sensitive	Present	Absent	PMEN9
SN6185	ERS069034	ERR052130	GCA_907170805	6259_4#18	18	This study	Germany	Europe	NA	Sensitive	Sensitive	Sensitive	Present	Absent	PMEN9
SN5988	ERS069037	ERR052133	GCA_907170795	6259_4#21	18	This study	Germany	Europe	NA	Sensitive	Sensitive	Sensitive	Present	Absent	PMEN9
SN4018	ERS068990	ERR391741	GCA_907170875	6289_7#18	18	This study	Germany	Europe	NA	Sensitive	Sensitive	Sensitive	Present	Absent	PMEN9
SN6204	ERS068992	ERR391743	GCA_907170895	6289_7#20	18	This study	Germany	Europe	NA	Sensitive	Sensitive	Sensitive	Present	Absent	PMEN9
SN4439	ERS068999	ERR052138	GCA_907172145	6289_8#5	18	This study	Germany	Europe	NA	Sensitive	Sensitive	Sensitive	Present	Absent	PMEN9
SN556	ERS069000	ERR052139	GCA_907170865	6289_8#6	18	This study	Germany	Europe	NA	Resistant	Resistant	Sensitive	Absent	Absent	PMEN9
SN649	ERS069001	ERR052140	GCA_907170215	6289_8#7	18	This study	Germany	Europe	NA	Sensitive	Resistant	Resistant	Absent	Present	PMEN9
SN7	ERS069004	ERR052143	GCA_907170845	6289_8#10	18	This study	Germany	Europe	NA	Sensitive	Sensitive	Sensitive	Present	Absent	PMEN9
SN4553	ERS069010	ERR052149	GCA_907170415	6289_8#16	18	This study	Germany	Europe	NA	Resistant	Resistant	Resistant	Present	Absent	PMEN9
SN1134	ERS069011	ERR052150	GCA_907172155	6289_8#17	18	This study	Germany	Europe	NA	Sensitive	Sensitive	Sensitive	Present	Absent	PMEN9
SN4822	ERS069012	ERR052151	GCA_907170885	6289_8#18	18	This study	Germany	Europe	NA	Sensitive	Sensitive	Sensitive	Present	Absent	PMEN9
SN6091	ERS069015	ERR052154	GCA_907170855	6289_8#21	18	This study	Germany	Europe	NA	Sensitive	Sensitive	Sensitive	Present	Absent	PMEN9
SN11903	ERS069038	ERR052156	GCA_907170905	6308_3#1	18	This study	Germany	Europe	NA	Sensitive	Sensitive	Sensitive	Present	Absent	PMEN9
SN20042	ERS069039	ERR052157	GCA_909594525	6308_3#2	18	This study	Germany	Europe	NA	Sensitive	Sensitive	Sensitive	Present	Absent	PMEN9
SN20085	ERS069040	ERR052158	GCA_909594575	6308_3#3	18	This study	Germany	Europe	NA	Sensitive	Sensitive	Sensitive	Present	Absent	PMEN9
SN20125	ERS069041	ERR052159	GCA_909594605	6308_3#4	18	This study	Germany	Europe	NA	Sensitive	Sensitive	Sensitive	Present	Absent	PMEN9
SN20126	ERS069042	ERR052160	GCA_909594595	6308_3#5	18	This study	Germany	Europe	NA	Sensitive	Sensitive	Sensitive	Present	Absent	PMEN9
SN20151	ERS069043	ERR052161	GCA_907170505	6308_3#6	18	This study	Germany	Europe	NA	Sensitive	Sensitive	Sensitive	Absent	Absent	PMEN9
SN20183	ERS069044	ERR052162	GCA_909594645	6308_3#7	18	This study	Germany	Europe	NA	Sensitive	Sensitive	Sensitive	Present	Absent	PMEN9
SN20310	ERS069045	ERR052163	GCA_909594555	6308_3#8	18	This study	Germany	Europe	NA	Sensitive	Sensitive	Sensitive	Present	Absent	PMEN9
SN20312	ERS069046	ERR052164	GCA_909594655	6308_3#9	18	This study	Germany	Europe	NA	Sensitive	Sensitive	Sensitive	Present	Absent	PMEN9
SN20340	ERS069047	ERR052165	GCA_907170455	6308_3#10	18	This study	Germany	Europe	NA	Sensitive	Sensitive	Sensitive	Present	Absent	PMEN9
SN20407	ERS069048	ERR052166	GCA_907170245	6308_3#11	18	This study	Germany	Europe	NA	Resistant	Resistant	Resistant	Absent	Absent	PMEN9
SN20603	ERS069049	ERR052167	GCA_909594515	6308_3#12	18	This study	Germany	Europe	NA	Sensitive	Sensitive	Sensitive	Present	Absent	PMEN9
SN20612	ERS069050	ERR052168	GCA_909594545	6308_3#13	18	This study	Germany	Europe	NA	Sensitive	Sensitive	Sensitive	Present	Absent	PMEN9
SN20613	ERS069051	ERR052169	GCA_909594495	6308_3#14	18	This study	Germany	Europe	NA	Sensitive	Sensitive	Sensitive	Present	Absent	PMEN9
SN20628	ERS069052	ERR052170	GCA_909594505	6308_3#15	18	This study	Germany	Europe	NA	Sensitive	Sensitive	Sensitive	Present	Absent	PMEN9
SN20636	ERS069054	ERR052172	GCA_907170475	6308_3#17	18	This study	Germany	Europe	NA	Sensitive	Sensitive	Sensitive	Present	Absent	PMEN9
SN20637	ERS069055	ERR052173	GCA_909594535	6308_3#18	18	This study	Germany	Europe	NA	Sensitive	Sensitive	Sensitive	Present	Absent	PMEN9
SN20647	ERS069056	ERR052174	GCA_907170445	6308_3#19	18	This study	Germany	Europe	NA	Sensitive	Sensitive	Sensitive	Present	Absent	PMEN9
SN20648	ERS069057	ERR052175	GCA_907170525	6308_3#20	18	This study	Germany	Europe	NA	Sensitive	Sensitive	Sensitive	Present	Absent	PMEN9
SN20660	ERS069058	ERR052176	GCA_907170515	6308_3#21	18	This study	Germany	Europe	NA	Sensitive	Sensitive	Sensitive	Present	Absent	PMEN9
SN20661	ERS069059	ERR052177	GCA_907170535	6308_3#22	18	This study	Germany	Europe	NA	Sensitive	Sensitive	Sensitive	Present	Absent	PMEN9
SN20662	ERS069060	ERR052178	GCA_909594485	6308_3#23	18	This study	Germany	Europe	NA	Sensitive	Sensitive	Sensitive	Absent	Absent	PMEN9
SN20714	ERS069061	ERR052179	GCA_909594635	6308_3#24	18	This study	Germany	Europe	NA	Sensitive	Sensitive	Sensitive	Present	Absent	PMEN9
SN20816	ERS069062	ERR052180	GCA_909594585	6308_4#1	18	This study	Germany	Europe	NA	Sensitive	Sensitive	Sensitive	Present	Absent	PMEN9
SN20869	ERS069063	ERR052181	GCA_909594725	6308_4#2	18	This study	Germany	Europe	NA	Sensitive	Sensitive	Sensitive	Present	Absent	PMEN9
SN20873	ERS069065	ERR052183	GCA_909594805	6308_4#4	18	This study	Germany	Europe	NA	Sensitive	Sensitive	Sensitive	Absent	Absent	PMEN9
SN20881	ERS069066	ERR052184	GCA_909594875	6308_4#5	18	This study	Germany	Europe	NA	Sensitive	Sensitive	Sensitive	Present	Absent	PMEN9
SN21124	ERS069067	ERR052185	GCA_909594775	6308_4#6	18	This study	Germany	Europe	NA	Sensitive	Sensitive	Sensitive	Present	Absent	PMEN9
SN21137	ERS069068	ERR052186	GCA_907170545	6308_4#7	18	This study	Germany	Europe	NA	Sensitive	Sensitive	Sensitive	Present	Absent	PMEN9
SN21148	ERS069069	ERR052187	GCA_909594855	6308_4#8	18	This study	Germany	Europe	NA	Sensitive	Sensitive	Sensitive	Present	Absent	PMEN9
SN21161	ERS069070	ERR052188	GCA_907170495	6308_4#9	18	This study	Germany	Europe	NA	Sensitive	Sensitive	Sensitive	Present	Absent	PMEN9
SN21393	ERS069071	ERR052189	GCA_909594615	6308_4#10	18	This study	Germany	Europe	NA	Sensitive	Sensitive	Sensitive	Present	Absent	PMEN9
SN21419	ERS069072	ERR052190	GCA_907170395	6308_4#11	18	This study	Germany	Europe	NA	Resistant	Resistant	Resistant	Absent	Absent	PMEN9
SN21494	ERS069073	ERR052191	GCA_909594665	6308_4#12	18	This study	Germany	Europe	NA	Sensitive	Sensitive	Sensitive	Present	Absent	PMEN9
SN21602	ERS069074	ERR052192	GCA_909594675	6308_4#13	18	This study	Germany	Europe	NA	Sensitive	Sensitive	Sensitive	Present	Absent	PMEN9
SN21650	ERS069075	ERR052193	GCA_909594565	6308_4#14	18	This study	Germany	Europe	NA	Sensitive	Sensitive	Sensitive	Present	Absent	PMEN9
SN21792	ERS069076	ERR052194	GCA_909594625	6308_4#15	18	This study	Germany	Europe	NA	Sensitive	Sensitive	Sensitive	Present	Absent	PMEN9
SN21830	ERS069077	ERR052195	GCA_909594685	6308_4#16	18	This study	Germany	Europe	NA	Sensitive	Sensitive	Sensitive	Present	Absent	PMEN9
SN21865	ERS069078	ERR052196	GCA_909594745	6308_4#17	18	This study	Germany	Europe	NA	Sensitive	Sensitive	Sensitive	Present	Absent	PMEN9
SN22138	ERS069079	ERR052197	GCA_909594695	6308_4#18	18	This study	Germany	Europe	NA	Sensitive	Sensitive	Sensitive	Present	Absent	PMEN9
SN22141	ERS069080	ERR052198	GCA_909594735	6308_4#19	18	This study	Germany	Europe	NA	Sensitive	Sensitive	Sensitive	Present	Absent	PMEN9
SN22149	ERS069081	ERR052199	GCA_909594705	6308_4#20	18	This study	Germany	Europe	NA	Sensitive	Sensitive	Sensitive	Present	Absent	PMEN9
SN22151	ERS069082	ERR052200	GCA_909594715	6308_4#21	18	This study	Germany	Europe	NA	Sensitive	Sensitive	Sensitive	Present	Absent	PMEN9
SN22152	ERS069083	ERR052201	GCA_909594835	6308_4#22	18	This study	Germany	Europe	NA	Sensitive	Sensitive	Sensitive	Present	Absent	PMEN9
SN22188	ERS069084	ERR052202	GCA_909594865	6308_4#23	18	This study	Germany	Europe	NA	Sensitive	Sensitive	Sensitive	Present	Absent	PMEN9
SN22344	ERS069085	ERR052203	GCA_909594755	6308_5#1	18	This study	Germany	Europe	NA	Sensitive	Sensitive	Sensitive	Present	Absent	PMEN9
SN22352	ERS069086	ERR052204	GCA_907171105	6308_5#2	18	This study	Germany	Europe	NA	Sensitive	Sensitive	Sensitive	Present	Absent	PMEN9
SN22354	ERS069087	ERR052205	GCA_907170565	6308_5#3	18	This study	Germany	Europe	NA	Sensitive	Sensitive	Sensitive	Present	Absent	PMEN9
SN22359	ERS069088	ERR052206	GCA_907171135	6308_5#4	18	This study	Germany	Europe	NA	Sensitive	Sensitive	Sensitive	Present	Absent	PMEN9
SN22360	ERS069089	ERR052207	GCA_907170615	6308_5#5	18	This study	Germany	Europe	NA	Sensitive	Sensitive	Sensitive	Present	Absent	PMEN9
SN22540	ERS069090	ERR052208	GCA_907171035	6308_5#6	18	This study	Germany	Europe	NA	Sensitive	Sensitive	Sensitive	Present	Absent	PMEN9
SN22557	ERS069091	ERR052209	GCA_907171025	6308_5#7	18	This study	Germany	Europe	NA	Sensitive	Sensitive	Sensitive	Present	Absent	PMEN9
SN22582	ERS069092	ERR052210	GCA_907170965	6308_5#8	18	This study	Germany	Europe	NA	Sensitive	Sensitive	Sensitive	Present	Absent	PMEN9
SN22601	ERS069093	ERR052211	GCA_907170975	6308_5#9	18	This study	Germany	Europe	NA	Sensitive	Sensitive	Sensitive	Present	Absent	PMEN9
SN22608	ERS069094	ERR052212	GCA_907170555	6308_5#10	18	This study	Germany	Europe	NA	Sensitive	Sensitive	Sensitive	Present	Absent	PMEN9
SN22635	ERS069095	ERR052213	GCA_909594815	6308_5#11	18	This study	Germany	Europe	NA	Sensitive	Sensitive	Sensitive	Present	Absent	PMEN9
SN22642	ERS069096	ERR052214	GCA_907170985	6308_5#12	18	This study	Germany	Europe	NA	Sensitive	Sensitive	Sensitive	Present	Absent	PMEN9
SN22660	ERS069097	ERR052215	GCA_907171115	6308_5#13	18	This study	Germany	Europe	NA	Sensitive	Sensitive	Sensitive	Present	Absent	PMEN9
SN22666	ERS069098	ERR052216	GCA_907171085	6308_5#14	18	This study	Germany	Europe	NA	Sensitive	Sensitive	Sensitive	Present	Absent	PMEN9
SN22677	ERS069099	ERR052217	GCA_907171075	6308_5#15	18	This study	Germany	Europe	NA	Sensitive	Sensitive	Sensitive	Present	Absent	PMEN9
SN22698	ERS069101	ERR052219	GCA_907171095	6308_5#17	18	This study	Germany	Europe	NA	Sensitive	Sensitive	Sensitive	Present	Absent	PMEN9
SN22720	ERS069102	ERR052220	GCA_907170575	6308_5#18	18	This study	Germany	Europe	NA	Sensitive	Sensitive	Sensitive	Present	Absent	PMEN9
SN22810	ERS069104	ERR052222	GCA_907171065	6308_5#20	18	This study	Germany	Europe	NA	Sensitive	Sensitive	Sensitive	Present	Absent	PMEN9
SN22811	ERS069105	ERR052223	GCA_907171125	6308_5#21	18	This study	Germany	Europe	NA	Sensitive	Sensitive	Sensitive	Present	Absent	PMEN9
SN22826	ERS069106	ERR052224	GCA_907171155	6308_5#22	18	This study	Germany	Europe	NA	Sensitive	Sensitive	Sensitive	Present	Absent	PMEN9
SN22875	ERS069107	ERR052225	GCA_907171165	6308_5#23	18	This study	Germany	Europe	NA	Sensitive	Sensitive	Sensitive	Absent	Absent	PMEN9
SN22876	ERS069108	ERR052226	GCA_907170915	6308_6#1	18	This study	Germany	Europe	NA	Sensitive	Sensitive	Sensitive	Absent	Absent	PMEN9
SN22880	ERS069111	ERR052229	GCA_907171195	6308_6#4	18	This study	Germany	Europe	NA	Sensitive	Sensitive	Sensitive	Absent	Absent	PMEN9
SN22955	ERS069113	ERR052231	GCA_907171205	6308_6#6	18	This study	Germany	Europe	NA	Sensitive	Sensitive	Sensitive	Absent	Absent	PMEN9
SN22956	ERS069114	ERR052232	GCA_907171175	6308_6#7	18	This study	Germany	Europe	NA	Sensitive	Sensitive	Sensitive	Absent	Absent	PMEN9
SN23032	ERS069115	ERR052233	GCA_907171145	6308_6#8	18	This study	Germany	Europe	NA	Sensitive	Sensitive	Sensitive	Present	Present	PMEN9
SN23049	ERS069116	ERR052234	GCA_907171185	6308_6#9	18	This study	Germany	Europe	NA	Sensitive	Sensitive	Sensitive	Present	Absent	PMEN9
SN23073	ERS069117	ERR052235	GCA_907170955	6308_6#10	18	This study	Germany	Europe	NA	Sensitive	Sensitive	Sensitive	Present	Absent	PMEN9
SN23312	ERS069118	ERR052236	GCA_907170995	6308_6#11	18	This study	Germany	Europe	NA	Sensitive	Sensitive	Sensitive	Present	Absent	PMEN9
SN23318	ERS069119	ERR052237	GCA_907170925	6308_6#12	18	This study	Germany	Europe	NA	Sensitive	Sensitive	Sensitive	Present	Absent	PMEN9
SN23362	ERS069120	ERR052238	GCA_907171045	6308_6#13	18	This study	Germany	Europe	NA	Sensitive	Sensitive	Sensitive	Present	Absent	PMEN9
SN23700	ERS069123	ERR052241	GCA_907171055	6308_6#16	18	This study	Germany	Europe	NA	Sensitive	Sensitive	Sensitive	Present	Absent	PMEN9
SN23956	ERS069124	ERR052242	GCA_907170935	6308_6#17	18	This study	Germany	Europe	NA	Sensitive	Sensitive	Sensitive	Present	Absent	PMEN9
SN24073	ERS069125	ERR052243	GCA_907171005	6308_6#18	18	This study	Germany	Europe	NA	Sensitive	Sensitive	Sensitive	Absent	Absent	PMEN9
SN24074	ERS069126	ERR052244	GCA_907171015	6308_6#19	18	This study	Germany	Europe	NA	Sensitive	Sensitive	Sensitive	Absent	Absent	PMEN9
SN26230	ERS069127	ERR052245	GCA_907170945	6308_6#20	18	This study	Germany	Europe	NA	Sensitive	Sensitive	Sensitive	Present	Absent	PMEN9
SN27041	ERS069155	ERR052297	GCA_907171265	6551_6#1	18	This study	Germany	Europe	NA	Sensitive	Sensitive	Sensitive	Present	Absent	PMEN9
SN27071	ERS069156	ERR052298	GCA_907171285	6551_6#2	18	This study	Germany	Europe	NA	Sensitive	Sensitive	Sensitive	Absent	Absent	PMEN9
SN27072	ERS069157	ERR052299	GCA_907171425	6551_6#3	18	This study	Germany	Europe	NA	Sensitive	Sensitive	Sensitive	Absent	Absent	PMEN9
SN27110	ERS069158	ERR052300	GCA_907171385	6551_6#4	18	This study	Germany	Europe	NA	Sensitive	Sensitive	Sensitive	Absent	Absent	PMEN9
SN27111	ERS069159	ERR052301	GCA_907171405	6551_6#5	18	This study	Germany	Europe	NA	Sensitive	Sensitive	Sensitive	Absent	Absent	PMEN9
SN27402	ERS069160	ERR052302	GCA_907171375	6551_6#6	18	This study	Germany	Europe	NA	Sensitive	Sensitive	Sensitive	Present	Absent	PMEN9
SN27457	ERS069161	ERR052303	GCA_907170185	6551_6#7	18	This study	Germany	Europe	NA	Resistant	Resistant	Resistant	Absent	Present	PMEN9
SN27467	ERS069162	ERR052304	GCA_907171365	6551_6#8	18	This study	Germany	Europe	NA	Sensitive	Sensitive	Sensitive	Present	Absent	PMEN9
SN27518	ERS069163	ERR052305	GCA_907171415	6551_6#9	18	This study	Germany	Europe	NA	Sensitive	Sensitive	Sensitive	Present	Absent	PMEN9
SN27556	ERS069164	ERR052306	GCA_907171255	6551_6#10	18	This study	Germany	Europe	NA	Sensitive	Sensitive	Sensitive	Present	Absent	PMEN9
SN27673	ERS069165	ERR052307	GCA_907171275	6551_6#11	18	This study	Germany	Europe	NA	Sensitive	Sensitive	Sensitive	Absent	Absent	PMEN9
SN27684	ERS069166	ERR052308	GCA_907171225	6551_6#12	18	This study	Germany	Europe	NA	Sensitive	Sensitive	Sensitive	Present	Absent	PMEN9
SN27815	ERS069167	ERR052309	GCA_907171215	6551_6#13	18	This study	Germany	Europe	NA	Sensitive	Sensitive	Sensitive	Present	Absent	PMEN9
SN27857	ERS069169	ERR052311	GCA_907171235	6551_6#15	18	This study	Germany	Europe	NA	Sensitive	Sensitive	Sensitive	Absent	Absent	PMEN9
SN27903	ERS069170	ERR052312	GCA_907171245	6551_6#16	18	This study	Germany	Europe	NA	Sensitive	Sensitive	Sensitive	Present	Absent	PMEN9
SN28019	ERS069171	ERR052313	GCA_907171335	6551_6#17	18	This study	Germany	Europe	NA	Sensitive	Sensitive	Sensitive	Present	Absent	PMEN9
SN28054	ERS069172	ERR052314	GCA_907171295	6551_6#18	18	This study	Germany	Europe	NA	Sensitive	Sensitive	Sensitive	Present	Absent	PMEN9
SN28129	ERS069173	ERR052315	GCA_907171315	6551_6#19	18	This study	Germany	Europe	NA	Sensitive	Sensitive	Sensitive	Present	Absent	PMEN9
SN28162	ERS069174	ERR052316	GCA_907171305	6551_6#20	18	This study	Germany	Europe	NA	Sensitive	Sensitive	Sensitive	Present	Absent	PMEN9
SN28177	ERS069175	ERR052317	GCA_907171345	6551_6#21	18	This study	Germany	Europe	NA	Sensitive	Sensitive	Sensitive	Present	Absent	PMEN9
SN28222	ERS069176	ERR052318	GCA_907171325	6551_6#22	18	This study	Germany	Europe	NA	Sensitive	Sensitive	Sensitive	Present	Absent	PMEN9
SN28230	ERS069177	ERR052319	GCA_907171355	6551_6#23	18	This study	Germany	Europe	NA	Sensitive	Sensitive	Sensitive	Present	Absent	PMEN9
SN28293	ERS069178	ERR052320	GCA_907171395	6551_6#24	18	This study	Germany	Europe	NA	Sensitive	Sensitive	Sensitive	Absent	Absent	PMEN9
SN28419	ERS069179	ERR052342	GCA_907171445	6551_8#1	18	This study	Germany	Europe	NA	Sensitive	Sensitive	Sensitive	Absent	Absent	PMEN9
SN28421	ERS069180	ERR052343	GCA_907171575	6551_8#2	18	This study	Germany	Europe	NA	Sensitive	Sensitive	Sensitive	Absent	Absent	PMEN9
SN28481	ERS069181	ERR052344	GCA_907171655	6551_8#3	18	This study	Germany	Europe	NA	Sensitive	Sensitive	Sensitive	Present	Absent	PMEN9
SN28493	ERS069182	ERR052345	GCA_907171585	6551_8#4	18	This study	Germany	Europe	NA	Sensitive	Sensitive	Sensitive	Present	Absent	PMEN9
SN28582	ERS069183	ERR052346	GCA_907171635	6551_8#5	18	This study	Germany	Europe	NA	Sensitive	Sensitive	Sensitive	Present	Absent	PMEN9
SN28685	ERS069184	ERR052347	GCA_907171645	6551_8#6	18	This study	Germany	Europe	NA	Sensitive	Sensitive	Sensitive	Present	Absent	PMEN9
SN28699	ERS069185	ERR052348	GCA_907171625	6551_8#7	18	This study	Germany	Europe	NA	Sensitive	Sensitive	Sensitive	Present	Absent	PMEN9
SN28777	ERS069187	ERR052350	GCA_907171615	6551_8#9	18	This study	Germany	Europe	NA	Sensitive	Sensitive	Sensitive	Present	Absent	PMEN9
SN28796	ERS069188	ERR052351	GCA_907171485	6551_8#10	18	This study	Germany	Europe	NA	Sensitive	Sensitive	Sensitive	Present	Absent	PMEN9
SN28797	ERS069189	ERR052352	GCA_907171465	6551_8#11	18	This study	Germany	Europe	NA	Sensitive	Sensitive	Sensitive	Present	Absent	PMEN9
SN28854	ERS069190	ERR052353	GCA_907171455	6551_8#12	18	This study	Germany	Europe	NA	Sensitive	Sensitive	Sensitive	Present	Absent	PMEN9
SN28890	ERS069191	ERR052354	GCA_907171435	6551_8#13	18	This study	Germany	Europe	NA	Sensitive	Sensitive	Sensitive	Present	Absent	PMEN9
SN28905	ERS069192	ERR052355	GCA_907171475	6551_8#14	18	This study	Germany	Europe	NA	Sensitive	Sensitive	Sensitive	Present	Absent	PMEN9
SN28918	ERS069193	ERR052356	GCA_907171495	6551_8#15	18	This study	Germany	Europe	NA	Sensitive	Sensitive	Sensitive	Present	Absent	PMEN9
SN28923	ERS069194	ERR052357	GCA_907171505	6551_8#16	18	This study	Germany	Europe	NA	Sensitive	Sensitive	Sensitive	Present	Absent	PMEN9
SN28974	ERS069195	ERR052358	GCA_907171555	6551_8#17	18	This study	Germany	Europe	NA	Sensitive	Sensitive	Sensitive	Present	Absent	PMEN9
SN28994	ERS069196	ERR052359	GCA_907171525	6551_8#18	18	This study	Germany	Europe	NA	Sensitive	Sensitive	Sensitive	Present	Absent	PMEN9
SN29738	ERS069197	ERR052360	GCA_907171565	6551_8#19	18	This study	Germany	Europe	NA	Sensitive	Sensitive	Sensitive	Present	Absent	PMEN9
SN29754	ERS069198	ERR052361	GCA_907171535	6551_8#20	18	This study	Germany	Europe	NA	Sensitive	Sensitive	Sensitive	Present	Absent	PMEN9
SN29770	ERS069199	ERR052362	GCA_907171515	6551_8#21	18	This study	Germany	Europe	NA	Sensitive	Sensitive	Sensitive	Present	Absent	PMEN9
SN29791	ERS069200	ERR052363	GCA_907171545	6551_8#22	18	This study	Germany	Europe	NA	Sensitive	Sensitive	Sensitive	Absent	Absent	PMEN9
SN29798	ERS069201	ERR052364	GCA_907171595	6551_8#23	18	This study	Germany	Europe	NA	Sensitive	Resistant	Sensitive	Absent	Absent	PMEN9
SN29801	ERS069202	ERR052365	GCA_907171605	6551_8#24	18	This study	Germany	Europe	NA	Sensitive	Sensitive	Sensitive	Present	Absent	PMEN9
SN29943	ERS069203	ERR052366	GCA_907171695	6569_3#1	18	This study	Germany	Europe	NA	Sensitive	Sensitive	Sensitive	Present	Absent	PMEN9
SN30590	ERS069205	ERR052368	GCA_907171765	6569_3#3	18	This study	Germany	Europe	NA	Sensitive	Sensitive	Sensitive	Present	Absent	PMEN9
SN31062	ERS069206	ERR052369	GCA_907171785	6569_3#4	18	This study	Germany	Europe	NA	Sensitive	Sensitive	Sensitive	Present	Absent	PMEN9
SN31137	ERS069207	ERR052370	GCA_907171815	6569_3#5	18	This study	Germany	Europe	NA	Sensitive	Sensitive	Sensitive	Present	Absent	PMEN9
SN31283	ERS069208	ERR052371	GCA_907171825	6569_3#6	18	This study	Germany	Europe	NA	Sensitive	Sensitive	Sensitive	Present	Absent	PMEN9
SN31318	ERS069209	ERR052372	GCA_907171835	6569_3#7	18	This study	Germany	Europe	NA	Sensitive	Sensitive	Sensitive	Present	Absent	PMEN9
SN31332	ERS069210	ERR052373	GCA_907171845	6569_3#8	18	This study	Germany	Europe	NA	Sensitive	Sensitive	Sensitive	Present	Absent	PMEN9
SN31383	ERS069211	ERR052374	GCA_907171855	6569_3#9	18	This study	Germany	Europe	NA	Sensitive	Sensitive	Sensitive	Present	Absent	PMEN9
SN31505	ERS069212	ERR052375	GCA_907171715	6569_3#10	18	This study	Germany	Europe	NA	Sensitive	Sensitive	Sensitive	Present	Absent	PMEN9
SN31578	ERS069213	ERR052376	GCA_907171705	6569_3#11	18	This study	Germany	Europe	NA	Sensitive	Sensitive	Sensitive	Absent	Present	PMEN9
SN31579	ERS069214	ERR052377	GCA_907171665	6569_3#12	18	This study	Germany	Europe	NA	Sensitive	Sensitive	Sensitive	Absent	Present	PMEN9
SN31580	ERS069215	ERR052378	GCA_907171675	6569_3#13	18	This study	Germany	Europe	NA	Sensitive	Sensitive	Sensitive	Absent	Absent	PMEN9
SN31960	ERS069216	ERR052379	GCA_907171685	6569_3#14	18	This study	Germany	Europe	NA	Sensitive	Sensitive	Sensitive	Present	Absent	PMEN9
SN32667	ERS069219	ERR052382	GCA_907171725	6569_3#17	18	This study	Germany	Europe	NA	Sensitive	Sensitive	Sensitive	Absent	Present	PMEN9
SN32775	ERS069220	ERR052383	GCA_907171735	6569_3#18	18	This study	Germany	Europe	NA	Sensitive	Sensitive	Sensitive	Present	Absent	PMEN9
SN32822	ERS069221	ERR052384	GCA_907171745	6569_3#19	18	This study	Germany	Europe	NA	Sensitive	Sensitive	Sensitive	Present	Absent	PMEN9
SN33000	ERS069223	ERR052386	GCA_907171805	6569_3#21	18	This study	Germany	Europe	NA	Sensitive	Sensitive	Sensitive	Present	Absent	PMEN9
SN33065	ERS069224	ERR052387	GCA_907171775	6569_3#22	18	This study	Germany	Europe	NA	Sensitive	Sensitive	Sensitive	Present	Absent	PMEN9
SN33147	ERS069225	ERR052388	GCA_907171795	6569_3#23	18	This study	Germany	Europe	NA	Sensitive	Sensitive	Sensitive	Present	Absent	PMEN9
SN33211	ERS069226	ERR052389	GCA_907171755	6569_3#24	18	This study	Germany	Europe	NA	Sensitive	Sensitive	Sensitive	Present	Absent	PMEN9
SPN33479	ERS069318	ERR271787	GCA_907171895	6569_6#1	18	This study	Germany	Europe	NA	Sensitive	Sensitive	Sensitive	Present	Absent	PMEN9
SPN34442	ERS069319	ERR271788	GCA_907171925	6569_6#2	18	This study	Germany	Europe	NA	Sensitive	Sensitive	Sensitive	Present	Absent	PMEN9
SPN35563	ERS069320	ERR271789	GCA_907171875	6569_6#3	18	This study	Germany	Europe	NA	Sensitive	Sensitive	Sensitive	Present	Absent	PMEN9
SPN44209	ERS069321	ERR271790	GCA_907171885	6569_6#4	18	This study	Germany	Europe	NA	Sensitive	Sensitive	Sensitive	Present	Absent	PMEN9
SPN33430	ERS069322	ERR271791	GCA_907171935	6569_6#5	18	This study	Germany	Europe	NA	Sensitive	Sensitive	Sensitive	Absent	Absent	PMEN9
SN22678	ERS069131	ERR052475	GCA_907171945	6578_6#1	18	This study	Germany	Europe	NA	Sensitive	Sensitive	Sensitive	Present	Absent	PMEN9
SN26272	ERS069132	ERR052476	GCA_907172015	6578_6#2	18	This study	Germany	Europe	NA	Sensitive	Sensitive	Sensitive	Present	Absent	PMEN9
SN26290	ERS069133	ERR052477	GCA_907172095	6578_6#3	18	This study	Germany	Europe	NA	Sensitive	Sensitive	Sensitive	Present	Absent	PMEN9
SN26412	ERS069134	ERR052478	GCA_907172065	6578_6#4	18	This study	Germany	Europe	NA	Sensitive	Sensitive	Sensitive	Present	Absent	PMEN9
SN26413	ERS069135	ERR052479	GCA_907170135	6578_6#5	18	This study	Germany	Europe	NA	Resistant	Resistant	Resistant	Absent	Present	PMEN9
SN26436	ERS069136	ERR052480	GCA_907170375	6578_6#6	18	This study	Germany	Europe	NA	Resistant	Resistant	Resistant	Absent	Absent	PMEN9
SN26444	ERS069137	ERR052481	GCA_907172105	6578_6#7	18	This study	Germany	Europe	NA	Sensitive	Sensitive	Sensitive	Present	Absent	PMEN9
SN26530	ERS069138	ERR052482	GCA_907172075	6578_6#8	18	This study	Germany	Europe	NA	Sensitive	Sensitive	Sensitive	Present	Absent	PMEN9
SN26571	ERS069139	ERR052483	GCA_907172085	6578_6#9	18	This study	Germany	Europe	NA	Sensitive	Sensitive	Sensitive	Present	Absent	PMEN9
SN26591	ERS069140	ERR052484	GCA_907171865	6578_6#10	18	This study	Germany	Europe	NA	Sensitive	Sensitive	Sensitive	Present	Absent	PMEN9
SN26675	ERS069141	ERR052485	GCA_907171915	6578_6#11	18	This study	Germany	Europe	NA	Sensitive	Sensitive	Sensitive	Present	Absent	PMEN9
SN26677	ERS069142	ERR052486	GCA_907171905	6578_6#12	18	This study	Germany	Europe	NA	Sensitive	Sensitive	Sensitive	Present	Absent	PMEN9
SN26678	ERS069143	ERR052487	GCA_907171955	6578_6#13	18	This study	Germany	Europe	NA	Sensitive	Sensitive	Sensitive	Present	Absent	PMEN9
SN26747	ERS069144	ERR052488	GCA_907171965	6578_6#14	18	This study	Germany	Europe	NA	Sensitive	Sensitive	Sensitive	Present	Absent	PMEN9
SN26782	ERS069145	ERR052489	GCA_907172005	6578_6#15	18	This study	Germany	Europe	NA	Sensitive	Sensitive	Sensitive	Present	Absent	PMEN9
SN26792	ERS069146	ERR052490	GCA_907170195	6578_6#16	18	This study	Germany	Europe	NA	Resistant	Resistant	Resistant	Absent	Present	PMEN9
SN26808	ERS069147	ERR052491	GCA_907171975	6578_6#17	18	This study	Germany	Europe	NA	Sensitive	Sensitive	Sensitive	Present	Absent	PMEN9
SN26818	ERS069148	ERR052492	GCA_907171995	6578_6#18	18	This study	Germany	Europe	NA	Sensitive	Sensitive	Sensitive	Present	Absent	PMEN9
SN26828	ERS069149	ERR052493	GCA_907171985	6578_6#19	18	This study	Germany	Europe	NA	Sensitive	Sensitive	Sensitive	Present	Absent	PMEN9
SN26861	ERS069150	ERR052494	GCA_907172055	6578_6#20	18	This study	Germany	Europe	NA	Sensitive	Sensitive	Sensitive	Present	Absent	PMEN9
SN26863	ERS069151	ERR052495	GCA_907172025	6578_6#21	18	This study	Germany	Europe	NA	Sensitive	Sensitive	Sensitive	Present	Absent	PMEN9
SN26876	ERS069152	ERR052496	GCA_907172035	6578_6#22	18	This study	Germany	Europe	NA	Sensitive	Sensitive	Sensitive	Present	Absent	PMEN9
SN26884	ERS069153	ERR052497	GCA_907172045	6578_6#23	18	This study	Germany	Europe	NA	Sensitive	Sensitive	Sensitive	Present	Absent	PMEN9
SN26993	ERS069154	ERR052498	GCA_907170235	6578_6#24	18	This study	Germany	Europe	NA	Resistant	Resistant	Resistant	Absent	Present	PMEN9
LMG687	ERS068610	ERR051920	GCA_907170595	6187_5#11	18	This study	Italy	Europe	NA	Sensitive	Sensitive	Sensitive	Absent	Present	PMEN9
LMG922	ERS068640	ERR052029	GCA_907170665	6246_3#6	18	This study	New Zealand	Asia	NA	Resistant	Resistant	Sensitive	Absent	Absent	PMEN9
LMG2220	ERS068750	ERR051954	GCA_907172115	6187_6#22	18	This study	Peru	South America	NA	Resistant	Resistant	Sensitive	Absent	Absent	PMEN9
LMG2249	ERS068756	ERR271765	GCA_907170365	6246_4#2	18	This study	Peru	South America	NA	Resistant	Resistant	Sensitive	Present	Absent	PMEN9
DCC1875	ERS069306	ERR052421	GCA_907170675	6569_5#10	18	This study	Portugal	Europe	NA	Sensitive	Sensitive	Sensitive	Present	Absent	PMEN9
PT952	ERS069307	ERR052422	GCA_907170625	6569_5#11	18	This study	Portugal	Europe	NA	Sensitive	Sensitive	Sensitive	Present	Absent	PMEN9
PT356	ERS069308	ERR052423	GCA_907170655	6569_5#12	18	This study	Portugal	Europe	NA	Sensitive	Sensitive	Sensitive	Present	Absent	PMEN9
PT5761	ERS069309	ERR052424	GCA_907170465	6569_5#13	18	This study	Portugal	Europe	NA	Sensitive	Sensitive	Sensitive	Present	Absent	PMEN9
DCC134	ERS069310	ERR052425	GCA_907170485	6569_5#14	18	This study	Portugal	Europe	NA	Resistant	Resistant	Sensitive	Absent	Present	PMEN9
DCC1698	ERS069311	ERR052426	GCA_907170645	6569_5#15	18	This study	Portugal	Europe	NA	Resistant	Sensitive	Sensitive	Absent	Present	PMEN9
WL_355	ERS069312	ERR052427	GCA_907172125	6569_5#16	18	This study	Portugal	Europe	NA	Sensitive	Sensitive	Sensitive	Absent	Absent	PMEN9
PT3451	ERS069313	ERR052428	GCA_907170335	6569_5#17	18	This study	Portugal	Europe	NA	Resistant	Resistant	Resistant	Absent	Present	PMEN9
PT3438	ERS069314	ERR052429	GCA_907170355	6569_5#18	18	This study	Portugal	Europe	NA	Resistant	Resistant	Resistant	Absent	Present	PMEN9
Tw01_0026	ERS015861	ERR028799	GCA_907169945	5468_2#11	18	This study	Taiwan	Asia	NA	Resistant	Resistant	Resistant	Absent	Present	PMEN9
DG_84	ERS068903	ERR051890	GCA_907170165	6187_4#4	18	This study	Turkey	Europe	NA	Resistant	Resistant	Resistant	Absent	Present	PMEN9
DG_95	ERS068904	ERR051891	GCA_907170155	6187_4#5	18	This study	Turkey	Europe	NA	Resistant	Resistant	Resistant	Absent	Present	PMEN9
DE_19	ERS068890	ERR051981	GCA_907170275	6237_8#3	NA	This study	Turkey	Europe	NA	Resistant	Resistant	Resistant	Absent	Absent	PMEN9
DG_66	ERS068900	ERR051985	GCA_907170295	6237_8#7	NA	This study	Turkey	Europe	NA	Resistant	Resistant	Resistant	Absent	Absent	PMEN9
LMG138	ERS068565	ERR052003	GCA_907170255	6246_2#3	NA	This study	Turkey	Europe	NA	Resistant	Resistant	Resistant	Absent	Present	PMEN9
36_PMEN9	ERS068871	ERR051885	GCA_907170585	5901_7#11	18	This study	UK	Europe	NA	Sensitive	Sensitive	Sensitive	Present	Absent	PMEN9
INV200	FQ312029		GCA_000210935	INV200	18	This study	UK	Europe	9	Sensitive	Sensitive	Sensitive	Present	Absent	PMEN9
LMG96	ERS068560	ERR051802	GCA_907170025	5749_6#12	18	This study	USA	North America	NA	Resistant	Resistant	Resistant	Present	Absent	PMEN9
0315-02	ERS068801	ERR051827	GCA_907169935	5901_2#1	18	This study	USA	North America	NA	Resistant	Resistant	Resistant	Present	Absent	PMEN9
0939-00	ERS068802	ERR051828	GCA_907170115	5901_2#2	18	This study	USA	North America	NA	Resistant	Resistant	Resistant	Present	Absent	PMEN9
1018-00	ERS068804	ERR051830	GCA_907170125	5901_2#4	18	This study	USA	North America	NA	Resistant	Resistant	Resistant	Present	Absent	PMEN9
1081-00	ERS068806	ERR051832	GCA_907170385	5901_2#6	18	This study	USA	North America	NA	Resistant	Resistant	Sensitive	Present	Absent	PMEN9
2522-01	ERS068809	ERR051835	GCA_907170205	5901_2#9	18	This study	USA	North America	NA	Resistant	Resistant	Resistant	Present	Absent	PMEN9
4764-03	ERS068825	ERR051839	GCA_907170095	5901_3#1	18	This study	USA	North America	NA	Resistant	Resistant	Resistant	Present	Absent	PMEN9
4911-02	ERS068827	ERR051841	GCA_907170045	5901_3#3	18	This study	USA	North America	NA	Resistant	Resistant	Resistant	Present	Absent	PMEN9
4916-02	ERS068828	ERR051842	GCA_907169915	5901_3#4	18	This study	USA	North America	NA	Resistant	Resistant	Resistant	Present	Absent	PMEN9
4976-03	ERS068829	ERR051843	GCA_907169985	5901_3#5	18	This study	USA	North America	NA	Resistant	Resistant	Resistant	Present	Absent	PMEN9
5067-03	ERS068830	ERR051844	GCA_907170015	5901_3#6	18	This study	USA	North America	NA	Sensitive	Sensitive	Resistant	Absent	Absent	PMEN9
5317-99	ERS068831	ERR051845	GCA_907170605	5901_3#7	18	This study	USA	North America	NA	Sensitive	Sensitive	Sensitive	Present	Absent	PMEN9
6027-02	ERS068839	ERR051853	GCA_907170075	5901_5#3	18	This study	USA	North America	NA	Resistant	Resistant	Resistant	Present	Absent	PMEN9
6550-03	ERS068847	ERR051861	GCA_907170005	5901_5#11	18	This study	USA	North America	NA	Resistant	Resistant	Resistant	Present	Absent	PMEN9
7385-99	ERS068855	ERR051869	GCA_907170265	5901_6#7	18	This study	USA	North America	NA	Resistant	Resistant	Resistant	Present	Absent	PMEN9
7875-99	ERS068860	ERR051874	GCA_907170285	5901_6#12	NA	This study	USA	North America	NA	Resistant	Resistant	Resistant	Present	Absent	PMEN9
8061-03	ERS068862	ERR051876	GCA_907170065	5901_7#2	18	This study	USA	North America	NA	Resistant	Resistant	Resistant	Present	Absent	PMEN9
9210-06	ERS068867	ERR051881	GCA_907170085	5901_7#7	18	This study	USA	North America	NA	Resistant	Resistant	Resistant	Present	Absent	PMEN9
LMG97	ERS068561	ERR051904	GCA_907170685	6187_4#18	18	This study	USA	North America	NA	Sensitive	Sensitive	Sensitive	Present	Absent	PMEN9
LMG810	ERS068623	ERR051926	GCA_907170105	6187_5#17	18	This study	USA	North America	NA	Resistant	Resistant	Resistant	Present	Absent	PMEN9
LMG818	ERS068625	ERR051928	GCA_907170145	6187_5#19	18	This study	USA	North America	NA	Resistant	Resistant	Resistant	Present	Absent	PMEN9
LMG912	ERS068638	ERR052027	GCA_907170225	6246_3#4	18	This study	USA	North America	NA	Resistant	Resistant	Resistant	Present	Absent	PMEN9
0246-02	ERS068800	ERR271774	GCA_907170035	6246_4#11	18	This study	USA	North America	NA	Resistant	Resistant	Resistant	Present	Absent	PMEN9
3339-03	ERS068814	ERR271776	GCA_907170055	6246_4#13	18	This study	USA	North America	NA	Resistant	Resistant	Resistant	Present	Absent	PMEN9
4095-04	ERS068822	ERR271783	GCA_907170175	6246_4#20	18	This study	USA	North America	NA	Resistant	Resistant	Resistant	Present	Absent	PMEN9
2842STDY5881891	ERS515146	ERR716187	GCA_900022895	14412_3#9	1	Lees et al	Netherlands	Europe	3259	Sensitive	Sensitive	Sensitive	Absent	Absent	-
2842STDY5753819	ERS409597	ERR564005	GCA_900017425	12754_4#62	1	Lees et al	Netherlands	Europe	236	Sensitive	Sensitive	Sensitive	Absent	Absent	-
2842STDY5644261	ERS367698	ERR461585	NA	11861_3#33	1	Lees et al	Netherlands	Europe	320	Resistant	Resistant	Resistant	Present	Present	-
2842STDY5643855	ERS367296	ERR461115	NA	11860_6#17	1	Lees et al	Netherlands	Europe	236	Sensitive	Sensitive	Sensitive	Absent	Absent	-
2842STDY5881883	ERS515138	ERR716179	NA	14412_3#1	2	Lees et al	Netherlands	Europe	300	Sensitive	Sensitive	Sensitive	Absent	Absent	-
2842STDY5644456	ERS367887	ERR461225	NA	11860_7#35	2	Lees et al	Netherlands	Europe	9046	Sensitive	Sensitive	Sensitive	Absent	Absent	-
2842STDY5644572	ERS368002	ERR461340	GCA_900016905	11860_8#58	2	Lees et al	Netherlands	Europe	618	Sensitive	Resistant	Sensitive	Absent	Present	-
4484STDY6808897	ERS1698822	ERR2305286	NA	22695_3#245	3	Lees et al	Netherlands	Europe	717	Sensitive	Sensitive	Sensitive	Absent	Present	-
4484STDY6808987	ERS1698911	ERR2305510	NA	22984_8#48	3	Lees et al	Netherlands	Europe	62	Sensitive	Sensitive	Sensitive	Absent	Absent	-
2842STDY5753145	ERS408930	ERR554891	GCA_900032865	12673_6#60	3	Lees et al	Netherlands	Europe	673	Sensitive	Sensitive	Sensitive	Absent	Absent	-
4484STDY6808833	ERS1698759	ERR2305642	NA	23495_7#86	3	Lees et al	Netherlands	Europe	673	Sensitive	Sensitive	Sensitive	Absent	Absent	-
4484STDY6632210	ERS1460417	ERR1947212	NA	21903_8#58	3	Lees et al	Netherlands	Europe	62	Resistant	Resistant	Sensitive	Absent	Absent	-
4484STDY6808543	ERS1698472	ERR2305452	NA	22709_8#365	3	Lees et al	Netherlands	Europe	673	Sensitive	Sensitive	Sensitive	Absent	Absent	-
4484STDY6808698	ERS1698625	ERR2305184	NA	22695_3#143	3	Lees et al	Netherlands	Europe	62	Sensitive	Sensitive	Sensitive	Absent	Absent	-
2842STDY5643914	ERS367355	ERR461173	NA	11860_6#77	3	Lees et al	Netherlands	Europe	62	Sensitive	Sensitive	Sensitive	Absent	Absent	-
4484STDY6808629	ERS1698557	ERR2305116	NA	22695_3#75	3	Lees et al	Netherlands	Europe	100	Sensitive	Sensitive	Sensitive	Absent	Absent	-
4484STDY6632052	ERS1460261	ERR1947786	NA	21946_6#266	3	Lees et al	Netherlands	Europe	62	Sensitive	Sensitive	Sensitive	Absent	Absent	-
4484STDY6632159	ERS1460366	ERR1947161	NA	21903_8#7	3	Lees et al	Netherlands	Europe	53	Sensitive	Sensitive	Sensitive	Absent	Absent	-
4484STDY6632545	ERS1460747	ERR1947539	NA	21946_6#19	3	Lees et al	Netherlands	Europe	673	Sensitive	Sensitive	Sensitive	Absent	Absent	-
4484STDY6808901	ERS1698826	ERR2305290	NA	22695_3#249	3	Lees et al	Netherlands	Europe	62	Sensitive	Sensitive	Sensitive	Absent	Absent	-
4484STDY6809012	ERS1698936	ERR2305535	NA	22984_8#73	3	Lees et al	Netherlands	Europe	62	Sensitive	Sensitive	Sensitive	Absent	Absent	-
2842STDY5643754	ERS367196	ERR461020	NA	11860_5#15	3	Lees et al	Netherlands	Europe	53	Sensitive	Sensitive	Sensitive	Absent	Absent	-
2842STDY5644399	ERS367833	ERR461719	GCA_900020685	11861_4#75	3	Lees et al	Netherlands	Europe	53	Sensitive	Sensitive	Sensitive	Absent	Absent	-
4484STDY6632624	ERS1461674	ERR1947616	NA	21946_6#96	3	Lees et al	Netherlands	Europe	53	Sensitive	Sensitive	Sensitive	Absent	Absent	-
4484STDY6632412	ERS1460617	ERR1947410	NA	21903_8#256	3	Lees et al	Netherlands	Europe	62	Sensitive	Sensitive	Sensitive	Absent	Absent	-
2842STDY5644010	ERS367450	ERR461451	NA	11861_1#76	3	Lees et al	Netherlands	Europe	53	Sensitive	Sensitive	Sensitive	Absent	Absent	-
2842STDY5644151	ERS367589	ERR461846	NA	11893_1#20	3	Lees et al	Netherlands	Europe	53	Sensitive	Sensitive	Sensitive	Absent	Absent	-
4484STDY6632641	ERS1461691	ERR1947633	NA	21946_6#113	3	Lees et al	Netherlands	Europe	62	Sensitive	Sensitive	Sensitive	Absent	Absent	-
4484STDY6808503	ERS1698432	ERR2305412	NA	22709_8#325	3	Lees et al	Netherlands	Europe	62	Sensitive	Sensitive	Sensitive	Absent	Absent	-
2842STDY5643962	ERS367402	ERR461404	GCA_900029955	11861_1#27	3	Lees et al	Netherlands	Europe	53	Sensitive	Sensitive	Sensitive	Absent	Absent	-
4484STDY6808723	ERS1698650	ERR2305209	NA	22695_3#168	3	Lees et al	Netherlands	Europe	62	Sensitive	Sensitive	Sensitive	Absent	Absent	-
4484STDY6808614	ERS1698542	ERR2305101	NA	22695_3#60	3	Lees et al	Netherlands	Europe	62	Sensitive	Sensitive	Sensitive	Absent	Absent	-
2842STDY5753817	ERS409595	ERR564003	NA	12754_4#60	3	Lees et al	Netherlands	Europe	53	Sensitive	Sensitive	Sensitive	Absent	Absent	-
4484STDY6632205	ERS1460412	ERR1947207	NA	21903_8#53	3	Lees et al	Netherlands	Europe	62	Sensitive	Sensitive	Sensitive	Absent	Absent	-
2842STDY5644330	ERS367766	ERR461652	GCA_900032225	11861_4#5	3	Lees et al	Netherlands	Europe	53	Sensitive	Sensitive	Sensitive	Absent	Absent	-
2842STDY5644062	ERS367501	ERR461495	NA	11861_2#28	3	Lees et al	Netherlands	Europe	53	Sensitive	Sensitive	Sensitive	Absent	Absent	-
4484STDY6632697	ERS1461746	ERR1947687	NA	21946_6#167	3	Lees et al	Netherlands	Europe	62~	Sensitive	Sensitive	Sensitive	Absent	Absent	-
4484STDY6808733	ERS1698660	ERR2305219	NA	22695_3#178	3	Lees et al	Netherlands	Europe	62	Sensitive	Sensitive	Sensitive	Absent	Absent	-
2842STDY5643753	ERS367195	ERR461019	GCA_900017855	11860_5#14	3	Lees et al	Netherlands	Europe	53	Sensitive	Sensitive	Sensitive	Absent	Absent	-
2842STDY5644332	ERS367768	ERR461654	NA	11861_4#7	3	Lees et al	Netherlands	Europe	53	Sensitive	Sensitive	Sensitive	Absent	Absent	-
4484STDY6808983	ERS1698907	ERR2305506	NA	22984_8#44	3	Lees et al	Netherlands	Europe	62	Sensitive	Sensitive	Sensitive	Absent	Absent	-
2842STDY5644476	ERS367907	ERR461245	GCA_900023725	11860_7#56	3	Lees et al	Netherlands	Europe	1789	Sensitive	Sensitive	Sensitive	Absent	Absent	-
2842STDY5644275	ERS367712	ERR461599	NA	11861_3#48	3	Lees et al	Netherlands	Europe	62	Sensitive	Sensitive	Sensitive	Absent	Absent	-
4484STDY6632090	ERS1460299	ERR1947824	NA	21946_6#304	3	Lees et al	Netherlands	Europe	62	Sensitive	Sensitive	Sensitive	Absent	Absent	-
4484STDY6808585	ERS1698513	ERR2305072	NA	22695_3#31	3	Lees et al	Netherlands	Europe	53	Sensitive	Sensitive	Sensitive	Absent	Absent	-
4484STDY6809042	ERS1698960	ERR2305334	NA	22695_3#293	3	Lees et al	Netherlands	Europe	62	Sensitive	Sensitive	Sensitive	Absent	Absent	-
4484STDY6632498	ERS1460701	ERR1947494	NA	21903_8#340	3	Lees et al	Netherlands	Europe	62	Sensitive	Sensitive	Sensitive	Absent	Absent	-
4484STDY6632309	ERS1460515	ERR1947309	NA	21903_8#155	3	Lees et al	Netherlands	Europe	62	Sensitive	Sensitive	Sensitive	Absent	Absent	-
2842STDY5753094	ERS408879	ERR554840	NA	12673_6#9	3	Lees et al	Netherlands	Europe	53	Sensitive	Sensitive	Sensitive	Absent	Absent	-
2842STDY5644040	ERS367479	ERR461473	GCA_900025145	11861_2#5	3	Lees et al	Netherlands	Europe	62	Sensitive	Sensitive	Sensitive	Absent	Absent	-
2842STDY5644230	ERS367667	ERR496944	GCA_900041745	12216_4#95	3	Lees et al	Netherlands	Europe	62	Sensitive	Sensitive	Sensitive	Absent	Absent	-
4484STDY6808586	ERS1698514	ERR2305073	NA	22695_3#32	3	Lees et al	Netherlands	Europe	62	Sensitive	Sensitive	Sensitive	Absent	Absent	-
2842STDY5643978	ERS367418	ERR461419	GCA_900023445	11861_1#44	3	Lees et al	Netherlands	Europe	53	Sensitive	Sensitive	Sensitive	Absent	Absent	-
4484STDY6632593	ERS1460795	ERR1947587	NA	21946_6#67	3	Lees et al	Netherlands	Europe	53	Sensitive	Sensitive	Sensitive	Absent	Absent	-
4484STDY6632198	ERS1460405	ERR1947200	NA	21903_8#46	3	Lees et al	Netherlands	Europe	62	Sensitive	Sensitive	Sensitive	Absent	Absent	-
2842STDY5644296	ERS367733	ERR461620	NA	11861_3#69	3	Lees et al	Netherlands	Europe	62	Sensitive	Sensitive	Sensitive	Absent	Absent	-
2842STDY5644023	ERS367463	ERR461460	NA	11861_1#86	3	Lees et al	Netherlands	Europe	60	Sensitive	Sensitive	Sensitive	Absent	Absent	-
2842STDY5643840	ERS367281	ERR461102	NA	11860_6#3	3	Lees et al	Netherlands	Europe	53	Sensitive	Sensitive	Sensitive	Absent	Absent	-
2842STDY5644295	ERS367732	ERR461619	GCA_900030555	11861_3#68	3	Lees et al	Netherlands	Europe	53	Sensitive	Sensitive	Sensitive	Absent	Absent	-
2842STDY5644609	ERS368038	ERR461376	GCA_900033435	11860_8#94	3	Lees et al	Netherlands	Europe	53	Sensitive	Sensitive	Sensitive	Absent	Absent	-
4484STDY6808631	ERS1698559	ERR2305118	NA	22695_3#77	3	Lees et al	Netherlands	Europe	673	Sensitive	Sensitive	Sensitive	Absent	Absent	-
4484STDY6632206	ERS1460413	ERR1947208	NA	21903_8#54	3	Lees et al	Netherlands	Europe	408	Sensitive	Sensitive	Sensitive	Absent	Absent	-
4484STDY6808745	ERS1698672	ERR2305231	NA	22695_3#190	3	Lees et al	Netherlands	Europe	408	Sensitive	Sensitive	Sensitive	Absent	Absent	-
2842STDY5644061	ERS367500	ERR461494	GCA_900042835	11861_2#27	3	Lees et al	Netherlands	Europe	53	Sensitive	Sensitive	Sensitive	Absent	Absent	-
2842STDY5881952	ERS515228	ERR716246	GCA_900031185	14412_3#69	3	Lees et al	Netherlands	Europe	1789	Sensitive	Sensitive	Sensitive	Absent	Absent	-
2842STDY5644244	ERS367681	ERR461568	GCA_900023795	11861_3#15	3	Lees et al	Netherlands	Europe	53	Sensitive	Sensitive	Sensitive	Absent	Absent	-
4484STDY6809001	ERS1698925	ERR2305524	NA	22984_8#62	3	Lees et al	Netherlands	Europe	62	Sensitive	Sensitive	Sensitive	Absent	Absent	-
4484STDY6808984	ERS1698908	ERR2305507	NA	22984_8#45	3	Lees et al	Netherlands	Europe	62	Sensitive	Sensitive	Sensitive	Absent	Absent	-
4484STDY6632062	ERS1460271	ERR1947796	NA	21946_6#276	3	Lees et al	Netherlands	Europe	62	Sensitive	Sensitive	Sensitive	Absent	Absent	-
4484STDY6808735	ERS1698662	ERR2305221	NA	22695_3#180	3	Lees et al	Netherlands	Europe	60	Sensitive	Sensitive	Sensitive	Absent	Absent	-
4484STDY6632705	ERS1461754	ERR1947695	NA	21946_6#175	3	Lees et al	Netherlands	Europe	62	Sensitive	Sensitive	Sensitive	Absent	Absent	-
2842STDY5644391	ERS367826	ERR461712	GCA_900018995	11861_4#68	3	Lees et al	Netherlands	Europe	53	Sensitive	Sensitive	Sensitive	Absent	Absent	-
2842STDY5643750	ERS367192	ERR461016	GCA_900017865	11860_5#11	3	Lees et al	Netherlands	Europe	53	Sensitive	Sensitive	Sensitive	Absent	Absent	-
2842STDY5643747	ERS367189	ERR461013	NA	11860_5#7	3	Lees et al	Netherlands	Europe	53	Sensitive	Sensitive	Sensitive	Absent	Absent	-
4484STDY6632706	ERS1461755	ERR1947696	NA	21946_6#176	3	Lees et al	Netherlands	Europe	62	Sensitive	Sensitive	Sensitive	Absent	Absent	-
4484STDY6632163	ERS1460370	ERR1947165	NA	21903_8#11	3	Lees et al	Netherlands	Europe	62	Sensitive	Sensitive	Sensitive	Absent	Absent	-
4484STDY6632570	ERS1460772	ERR1947564	NA	21946_6#44	3	Lees et al	Netherlands	Europe	62	Sensitive	Sensitive	Sensitive	Absent	Absent	-
4484STDY6632389	ERS1460594	ERR1947387	NA	21903_8#233	3	Lees et al	Netherlands	Europe	62	Sensitive	Sensitive	Sensitive	Absent	Absent	-
2842STDY5644205	ERS367643	ERR461896	GCA_900030535	11893_1#72	3	Lees et al	Netherlands	Europe	673	Sensitive	Sensitive	Sensitive	Absent	Absent	-
4484STDY6632384	ERS1460589	ERR1947382	NA	21903_8#228	3	Lees et al	Netherlands	Europe	62	Sensitive	Sensitive	Sensitive	Absent	Absent	-
4484STDY6808484	ERS1698413	ERR2305393	NA	22709_8#306	3	Lees et al	Netherlands	Europe	496	Sensitive	Sensitive	Sensitive	Absent	Absent	-
2842STDY5644392	ERS367827	ERR461713	NA	11861_4#69	3	Lees et al	Netherlands	Europe	53	Sensitive	Sensitive	Sensitive	Absent	Absent	-
4484STDY6808898	ERS1698823	ERR2305287	NA	22695_3#246	3	Lees et al	Netherlands	Europe	62	Sensitive	Sensitive	Sensitive	Absent	Absent	-
4484STDY6632214	ERS1460421	ERR1947216	NA	21903_8#62	3	Lees et al	Netherlands	Europe	62	Sensitive	Sensitive	Sensitive	Absent	Absent	-
4484STDY6632418	ERS1460623	ERR1947416	NA	21903_8#262	3	Lees et al	Netherlands	Europe	62	Resistant	Resistant	Sensitive	Present	Absent	-
4484STDY6808704	ERS1698631	ERR2305190	NA	22695_3#149	3	Lees et al	Netherlands	Europe	62	Sensitive	Sensitive	Sensitive	Absent	Absent	-
2842STDY5644319	ERS367755	ERR461641	NA	11861_3#90	3	Lees et al	Netherlands	Europe	53	Sensitive	Sensitive	Sensitive	Absent	Absent	-
4484STDY6808668	ERS1698595	ERR2305154	NA	22695_3#113	3	Lees et al	Netherlands	Europe	62	Sensitive	Sensitive	Sensitive	Absent	Absent	-
2842STDY5643681	ERS367124	ERR460953	GCA_900029425	11860_4#38	3	Lees et al	Netherlands	Europe	53	Sensitive	Sensitive	Sensitive	Absent	Absent	-
4484STDY6808502	ERS1698431	ERR2305411	NA	22709_8#324	3	Lees et al	Netherlands	Europe	673	Sensitive	Sensitive	Sensitive	Absent	Absent	-
4484STDY6808632	ERS1698560	ERR2305119	NA	22695_3#78	3	Lees et al	Netherlands	Europe	673	Sensitive	Sensitive	Sensitive	Absent	Absent	-
4484STDY6632010	ERS1460220	ERR1947746	NA	21946_6#226	3	Lees et al	Netherlands	Europe	62	Sensitive	Sensitive	Sensitive	Absent	Absent	-
4484STDY6631996	ERS1460206	ERR1947732	NA	21946_6#212	3	Lees et al	Netherlands	Europe	673	Sensitive	Sensitive	Sensitive	Absent	Absent	-
4484STDY6808613	ERS1698541	ERR2305100	NA	22695_3#59	3	Lees et al	Netherlands	Europe	62	Sensitive	Sensitive	Sensitive	Absent	Absent	-
2842STDY5644267	ERS367704	ERR461591	NA	11861_3#39	3	Lees et al	Netherlands	Europe	62	Sensitive	Sensitive	Sensitive	Absent	Absent	-
4484STDY6632531	ERS1460733	ERR1947525	NA	21946_6#5	3	Lees et al	Netherlands	Europe	673	Sensitive	Sensitive	Sensitive	Absent	Absent	-
4484STDY6808732	ERS1698659	ERR2305218	NA	22695_3#177	3	Lees et al	Netherlands	Europe	62	Sensitive	Sensitive	Sensitive	Absent	Absent	-
2842STDY5643958	ERS367398	ERR461400	NA	11861_1#23	3	Lees et al	Netherlands	Europe	53	Sensitive	Sensitive	Sensitive	Absent	Absent	-
2842STDY5644547	ERS367977	ERR461315	GCA_900047555	11860_8#32	3	Lees et al	Netherlands	Europe	62	Sensitive	Sensitive	Sensitive	Absent	Absent	-
4484STDY6632321	ERS1460527	ERR1947321	NA	21903_8#167	3	Lees et al	Netherlands	Europe	673	Sensitive	Sensitive	Sensitive	Absent	Absent	-
4484STDY6808932	ERS1698857	ERR2305321	NA	22695_3#280	3	Lees et al	Netherlands	Europe	62	Sensitive	Sensitive	Sensitive	Absent	Absent	-
2842STDY5753110	ERS408895	ERR554856	GCA_900022855	12673_6#25	3	Lees et al	Netherlands	Europe	53	Sensitive	Sensitive	Sensitive	Absent	Absent	-
2842STDY5643700	ERS367143	ERR460972	GCA_900017375	11860_4#58	3	Lees et al	Netherlands	Europe	53	Sensitive	Sensitive	Sensitive	Absent	Absent	-
4484STDY6632562	ERS1460764	ERR1947556	NA	21946_6#36	3	Lees et al	Netherlands	Europe	62	Sensitive	Sensitive	Sensitive	Absent	Absent	-
2842STDY5644090	ERS367529	ERR461522	GCA_900023545	11861_2#57	3	Lees et al	Netherlands	Europe	62	Sensitive	Sensitive	Sensitive	Absent	Absent	-
4484STDY6809027	ERS1698951	ERR2305550	NA	22984_8#88	3	Lees et al	Netherlands	Europe	62	Sensitive	Sensitive	Sensitive	Absent	Absent	-
2842STDY5643930	ERS367371	ERR461189	GCA_900019495	11860_6#93	3	Lees et al	Netherlands	Europe	1050	Sensitive	Sensitive	Sensitive	Absent	Absent	-
4484STDY6632012	ERS1460222	ERR1947748	NA	21946_6#228	3	Lees et al	Netherlands	Europe	62	Sensitive	Sensitive	Sensitive	Absent	Absent	-
4484STDY6809043	ERS1698961	ERR2305335	NA	22695_3#294	3	Lees et al	Netherlands	Europe	62	Sensitive	Sensitive	Sensitive	Absent	Absent	-
4484STDY6809064	ERS1698987	ERR2305356	NA	22695_3#315	3	Lees et al	Netherlands	Europe	53	Sensitive	Sensitive	Sensitive	Absent	Absent	-
4484STDY6632188	ERS1460395	ERR1947190	NA	21903_8#36	3	Lees et al	Netherlands	Europe	2705	Sensitive	Resistant	Sensitive	Present	Absent	-
4484STDY6632009	ERS1460219	ERR1947745	NA	21946_6#225	3	Lees et al	Netherlands	Europe	53	Sensitive	Sensitive	Sensitive	Absent	Absent	-
4484STDY6808871	ERS1698796	ERR2305260	NA	22695_3#219	3	Lees et al	Netherlands	Europe	62	Sensitive	Sensitive	Sensitive	Absent	Absent	-
4484STDY6808602	ERS1698530	ERR2305089	NA	22695_3#48	3	Lees et al	Netherlands	Europe	673	Sensitive	Sensitive	Sensitive	Absent	Absent	-
4484STDY6808547	ERS1698476	ERR2305456	NA	22709_8#369	3	Lees et al	Netherlands	Europe	673	Sensitive	Sensitive	Sensitive	Absent	Absent	-
2842STDY5644693	ERS368121	ERR461821	GCA_900042805	11861_5#84	3	Lees et al	Netherlands	Europe	60	Sensitive	Sensitive	Sensitive	Absent	Absent	-
4484STDY6632054	ERS1460263	ERR1947788	NA	21946_6#268	3	Lees et al	Netherlands	Europe	408	Sensitive	Sensitive	Sensitive	Absent	Absent	-
2842STDY5643836	ERS367278	ERR461099	NA	11860_5#96	3	Lees et al	Netherlands	Europe	62	Sensitive	Sensitive	Sensitive	Absent	Absent	-
2842STDY5643764	ERS367206	ERR461030	NA	11860_5#25	3	Lees et al	Netherlands	Europe	62	Sensitive	Sensitive	Sensitive	Absent	Absent	-
4484STDY6632014	ERS1460224	ERR1947750	NA	21946_6#230	3	Lees et al	Netherlands	Europe	62	Sensitive	Sensitive	Sensitive	Absent	Absent	-
2842STDY5643988	ERS367428	ERR461429	GCA_900023945	11861_1#54	3	Lees et al	Netherlands	Europe	673	Sensitive	Sensitive	Sensitive	Absent	Absent	-
4484STDY6631997	ERS1460207	ERR1947733	NA	21946_6#213	3	Lees et al	Netherlands	Europe	62	Sensitive	Sensitive	Sensitive	Absent	Absent	-
2842STDY5644088	ERS367527	ERR461520	NA	11861_2#55	3	Lees et al	Netherlands	Europe	53	Sensitive	Sensitive	Sensitive	Absent	Absent	-
4484STDY6632118	ERS1460327	ERR1947852	NA	21946_6#332	3	Lees et al	Netherlands	Europe	717	Sensitive	Sensitive	Sensitive	Absent	Present	-
2842STDY5643829	ERS367271	ERR461092	GCA_900017385	11860_5#89	3	Lees et al	Netherlands	Europe	53	Sensitive	Sensitive	Sensitive	Absent	Absent	-
4484STDY6809068	ERS1698991	ERR2305360	NA	22695_3#319	3	Lees et al	Netherlands	Europe	673	Sensitive	Sensitive	Sensitive	Absent	Absent	-
4484STDY6809006	ERS1698930	ERR2305529	NA	22984_8#67	3	Lees et al	Netherlands	Europe	62	Sensitive	Sensitive	Sensitive	Absent	Absent	-
2842STDY5644614	ERS368043	ERR461743	GCA_900046545	11861_5#3	3	Lees et al	Netherlands	Europe	53	Sensitive	Sensitive	Sensitive	Absent	Absent	-
4484STDY6632636	ERS1461686	ERR1947628	NA	21946_6#108	3	Lees et al	Netherlands	Europe	62	Sensitive	Sensitive	Sensitive	Absent	Absent	-
4484STDY6808524	ERS1698446	ERR2305433	NA	22709_8#346	3	Lees et al	Netherlands	Europe	60	Sensitive	Sensitive	Sensitive	Absent	Absent	-
4484STDY6808709	ERS1698636	ERR2305195	NA	22695_3#154	3	Lees et al	Netherlands	Europe	62	Sensitive	Sensitive	Sensitive	Absent	Absent	-
4484STDY6808734	ERS1698661	ERR2305220	NA	22695_3#179	3	Lees et al	Netherlands	Europe	62	Sensitive	Sensitive	Sensitive	Absent	Absent	-
4484STDY6632577	ERS1460779	ERR1947571	NA	21946_6#51	3	Lees et al	Netherlands	Europe	673	Sensitive	Sensitive	Sensitive	Absent	Absent	-
4484STDY6808550	ERS1698479	ERR2305459	NA	22709_8#372	3	Lees et al	Netherlands	Europe	62	Sensitive	Sensitive	Sensitive	Absent	Absent	-
2842STDY5644352	ERS367788	ERR461674	GCA_900029475	11861_4#28	3	Lees et al	Netherlands	Europe	62	Sensitive	Sensitive	Sensitive	Absent	Absent	-
4484STDY6632111	ERS1460320	ERR1947845	NA	21946_6#325	3	Lees et al	Netherlands	Europe	408	Sensitive	Sensitive	Sensitive	Absent	Absent	-
4484STDY6632088	ERS1460297	ERR1947822	NA	21946_6#302	3	Lees et al	Netherlands	Europe	4059	Sensitive	Sensitive	Sensitive	Absent	Absent	-
2842STDY5644210	ERS367648	ERR461901	GCA_900032845	11893_1#77	3	Lees et al	Netherlands	Europe	673	Sensitive	Sensitive	Sensitive	Absent	Absent	-
2842STDY5644574	ERS368004	ERR461342	GCA_900047575	11860_8#60	3	Lees et al	Netherlands	Europe	53~	Sensitive	Sensitive	Sensitive	Absent	Absent	-
2842STDY5644162	ERS367600	ERR450620	NA	11822_8#49	3	Lees et al	Netherlands	Europe	62	Sensitive	Sensitive	Sensitive	Absent	Absent	-
4484STDY6632623	ERS1461673	ERR1947615	NA	21946_6#95	3	Lees et al	Netherlands	Europe	62	Sensitive	Sensitive	Sensitive	Absent	Absent	-
4484STDY6808784	ERS1698710	ERR2305594	NA	23495_7#38	3	Lees et al	Netherlands	Europe	62	Sensitive	Sensitive	Sensitive	Absent	Absent	-
2842STDY5643712	ERS367155	ERR485957	GCA_900020565	12045_8#79	3	Lees et al	Netherlands	Europe	53	Sensitive	Sensitive	Sensitive	Absent	Absent	-
4484STDY6632322	ERS1460528	ERR1947322	NA	21903_8#168	3	Lees et al	Netherlands	Europe	62	Sensitive	Sensitive	Sensitive	Absent	Absent	-
4484STDY6632592	ERS1460794	ERR1947586	NA	21946_6#66	3	Lees et al	Netherlands	Europe	53	Sensitive	Sensitive	Sensitive	Absent	Absent	-
2842STDY5643944	ERS367384	ERR461387	NA	11861_1#10	3	Lees et al	Netherlands	Europe	53	Sensitive	Sensitive	Sensitive	Absent	Absent	-
4484STDY6808510	ERS1698439	ERR2305419	NA	22709_8#332	3	Lees et al	Netherlands	Europe	62	Sensitive	Sensitive	Sensitive	Absent	Absent	-
4484STDY6632427	ERS1460630	ERR1947423	NA	21903_8#269	3	Lees et al	Netherlands	Europe	62	Sensitive	Sensitive	Sensitive	Absent	Absent	-
4484STDY6632346	ERS1460551	ERR1947344	NA	21903_8#190	3	Lees et al	Netherlands	Europe	62	Sensitive	Sensitive	Sensitive	Absent	Absent	-
4484STDY6632070	ERS1460279	ERR1947804	NA	21946_6#284	3	Lees et al	Netherlands	Europe	62	Sensitive	Sensitive	Sensitive	Absent	Absent	-
4484STDY6632279	ERS1460485	ERR1947279	NA	21903_8#125	3	Lees et al	Netherlands	Europe	673	Sensitive	Sensitive	Sensitive	Absent	Absent	-
4484STDY6632486	ERS1460689	ERR1947482	NA	21903_8#328	3	Lees et al	Netherlands	Europe	62	Sensitive	Sensitive	Sensitive	Absent	Absent	-
2842STDY5644321	ERS367757	ERR461643	NA	11861_3#92	3	Lees et al	Netherlands	Europe	53	Sensitive	Sensitive	Sensitive	Absent	Absent	-
4484STDY6632401	ERS1460606	ERR1947399	NA	21903_8#245	3	Lees et al	Netherlands	Europe	62	Sensitive	Sensitive	Sensitive	Absent	Absent	-
4484STDY6632291	ERS1460497	ERR1947291	NA	21903_8#137	3	Lees et al	Netherlands	Europe	673	Sensitive	Sensitive	Sensitive	Absent	Absent	-
2842STDY5643707	ERS367150	ERR460979	GCA_900021405	11860_4#65	3	Lees et al	Netherlands	Europe	53	Sensitive	Sensitive	Sensitive	Absent	Absent	-
4484STDY6808941	ERS1698865	ERR2305464	NA	22984_8#2	3	Lees et al	Netherlands	Europe	62	Sensitive	Sensitive	Sensitive	Absent	Absent	-
4484STDY6632478	ERS1460681	ERR1947474	NA	21903_8#320	3	Lees et al	Netherlands	Europe	62	Sensitive	Sensitive	Sensitive	Absent	Absent	-
2842STDY5643692	ERS367135	ERR460964	NA	11860_4#50	3	Lees et al	Netherlands	Europe	53	Sensitive	Sensitive	Sensitive	Absent	Absent	-
4484STDY6808761	ERS1698687	ERR2305571	NA	23495_7#15	3	Lees et al	Netherlands	Europe	673	Sensitive	Sensitive	Sensitive	Absent	Absent	-
2842STDY5643961	ERS367401	ERR461403	NA	11861_1#26	3	Lees et al	Netherlands	Europe	496	Sensitive	Resistant	Sensitive	Absent	Absent	-
2842STDY5643766	ERS367208	ERR461032	GCA_900018895	11860_5#27	3	Lees et al	Netherlands	Europe	1012	Sensitive	Sensitive	Sensitive	Absent	Absent	-
2842STDY5644347	ERS367783	ERR461669	NA	11861_4#23	3	Lees et al	Netherlands	Europe	53~	Sensitive	Sensitive	Sensitive	Absent	Absent	-
4484STDY6808595	ERS1698523	ERR2305082	NA	22695_3#41	3	Lees et al	Netherlands	Europe	62	Sensitive	Sensitive	Sensitive	Absent	Absent	-
2842STDY5753100	ERS408885	ERR554846	GCA_900020795	12673_6#15	3	Lees et al	Netherlands	Europe	53	Sensitive	Sensitive	Sensitive	Absent	Absent	-
2842STDY5644237	ERS367674	ERR461561	NA	11861_3#7	3	Lees et al	Netherlands	Europe	53	Sensitive	Sensitive	Sensitive	Absent	Absent	-
4484STDY6632204	ERS1460411	ERR1947206	NA	21903_8#52	3	Lees et al	Netherlands	Europe	62	Sensitive	Sensitive	Sensitive	Absent	Absent	-
4484STDY6808743	ERS1698670	ERR2305229	NA	22695_3#188	3	Lees et al	Netherlands	Europe	62	Sensitive	Sensitive	Sensitive	Absent	Absent	-
2842STDY5643807	ERS367249	ERR461071	GCA_900047625	11860_5#68	3	Lees et al	Netherlands	Europe	53	Sensitive	Sensitive	Sensitive	Absent	Absent	-
4484STDY6632314	ERS1460520	ERR1947314	NA	21903_8#160	3	Lees et al	Netherlands	Europe	673	Sensitive	Sensitive	Sensitive	Absent	Absent	-
4484STDY6632179	ERS1460386	ERR1947181	NA	21903_8#27	3	Lees et al	Netherlands	Europe	62	Sensitive	Sensitive	Sensitive	Absent	Absent	-
4484STDY6808759	ERS1698685	ERR2305569	NA	23495_7#13	3	Lees et al	Netherlands	Europe	62	Sensitive	Sensitive	Sensitive	Absent	Absent	-
4484STDY6808532	ERS1698454	ERR2305441	NA	22709_8#354	3	Lees et al	Netherlands	Europe	62	Sensitive	Sensitive	Sensitive	Absent	Absent	-
2842STDY5643694	ERS367137	ERR460966	GCA_900016945	11860_4#52	3	Lees et al	Netherlands	Europe	662~	Sensitive	Sensitive	Sensitive	Absent	Present	-
4484STDY6632349	ERS1460554	ERR1947347	NA	21903_8#193	3	Lees et al	Netherlands	Europe	53	Sensitive	Sensitive	Sensitive	Absent	Absent	-
2842STDY5643809	ERS367251	ERR461073	GCA_900016995	11860_5#70	3	Lees et al	Netherlands	Europe	53	Sensitive	Sensitive	Sensitive	Absent	Absent	-
2842STDY5643870	ERS367311	ERR461130	GCA_900046975	11860_6#33	3	Lees et al	Netherlands	Europe	53	Sensitive	Sensitive	Sensitive	Absent	Absent	-
2842STDY5644279	ERS367716	ERR461603	GCA_900020815	11861_3#52	3	Lees et al	Netherlands	Europe	717	Sensitive	Sensitive	Sensitive	Absent	Present	-
2842STDY5643806	ERS367248	ERR461070	GCA_900034025	11860_5#67	3	Lees et al	Netherlands	Europe	496	Sensitive	Sensitive	Sensitive	Absent	Absent	-
2842STDY5644599	ERS368029	ERR461367	NA	11860_8#85	3	Lees et al	Netherlands	Europe	100	Sensitive	Sensitive	Sensitive	Absent	Absent	-
4484STDY6632378	ERS1460583	ERR1947376	NA	21903_8#222	3	Lees et al	Netherlands	Europe	62	Sensitive	Sensitive	Sensitive	Absent	Absent	-
2842STDY5643811	ERS367253	ERR461074	NA	11860_5#71	3	Lees et al	Netherlands	Europe	53	Sensitive	Sensitive	Sensitive	Absent	Absent	-
4484STDY6808542	ERS1698471	ERR2305451	NA	22709_8#364	3	Lees et al	Netherlands	Europe	673	Sensitive	Sensitive	Sensitive	Absent	Absent	-
2842STDY5881954	ERS515232	ERR716248	NA	14412_3#71	3	Lees et al	Netherlands	Europe	53	Sensitive	Sensitive	Sensitive	Absent	Absent	-
4484STDY6808931	ERS1698856	ERR2305320	NA	22695_3#279	3	Lees et al	Netherlands	Europe	60	Sensitive	Sensitive	Sensitive	Absent	Absent	-
2842STDY5644132	ERS367570	ERR461829	GCA_900020645	11893_1#1	3	Lees et al	Netherlands	Europe	673	Sensitive	Sensitive	Sensitive	Absent	Absent	-
4484STDY6632437	ERS1460640	ERR1947433	NA	21903_8#279	3	Lees et al	Netherlands	Europe	62	Sensitive	Sensitive	Sensitive	Absent	Absent	-
2842STDY5644427	ERS367860	ERR461198	NA	11860_7#6	3	Lees et al	Netherlands	Europe	62	Sensitive	Sensitive	Sensitive	Absent	Absent	-
4484STDY6808834	ERS1698760	ERR2305643	NA	23495_7#87	3	Lees et al	Netherlands	Europe	673	Sensitive	Sensitive	Sensitive	Absent	Absent	-
2842STDY5643877	ERS367318	ERR461137	GCA_900023355	11860_6#40	3	Lees et al	Netherlands	Europe	53~	Sensitive	Sensitive	Sensitive	Absent	Absent	-
4484STDY6808885	ERS1698810	ERR2305274	NA	22695_3#233	3	Lees et al	Netherlands	Europe	62	Sensitive	Sensitive	Sensitive	Absent	Absent	-
2842STDY5881867	ERS515122	ERR716163	GCA_900027225	14355_8#80	3	Lees et al	Netherlands	Europe	62~	Sensitive	Sensitive	Sensitive	Absent	Absent	-
2842STDY5644004	ERS367444	ERR461445	NA	11861_1#70	3	Lees et al	Netherlands	Europe	53	Sensitive	Sensitive	Sensitive	Absent	Absent	-
2842STDY5644647	ERS368076	ERR461776	NA	11861_5#38	3	Lees et al	Netherlands	Europe	53	Sensitive	Sensitive	Sensitive	Absent	Absent	-
4484STDY6808511	ERS1698455	ERR2305420	NA	22709_8#333	3	Lees et al	Netherlands	Europe	62	Sensitive	Sensitive	Sensitive	Absent	Absent	-
4484STDY6808726	ERS1698653	ERR2305212	NA	22695_3#171	3	Lees et al	Netherlands	Europe	62	Sensitive	Sensitive	Sensitive	Absent	Absent	-
4484STDY6632109	ERS1460318	ERR1947843	NA	21946_6#323	3	Lees et al	Netherlands	Europe	60	Sensitive	Sensitive	Sensitive	Absent	Absent	-
2842STDY5644699	ERS368127	ERR461827	NA	11861_5#90	3	Lees et al	Netherlands	Europe	53	Sensitive	Sensitive	Sensitive	Absent	Absent	-
2842STDY5644097	ERS367536	ERR461529	GCA_900040025	11861_2#64	3	Lees et al	Netherlands	Europe	496	Sensitive	Sensitive	Sensitive	Absent	Absent	-
2842STDY5643799	ERS367241	ERR461063	NA	11860_5#60	3	Lees et al	Netherlands	Europe	53	Sensitive	Sensitive	Sensitive	Absent	Absent	-
4484STDY6808472	ERS1698401	ERR2305381	NA	22709_8#294	3	Lees et al	Netherlands	Europe	53	Sensitive	Sensitive	Sensitive	Absent	Absent	-
4484STDY6632209	ERS1460416	ERR1947211	NA	21903_8#57	3	Lees et al	Netherlands	Europe	62	Sensitive	Sensitive	Sensitive	Absent	Absent	-
4484STDY6631966	ERS1460176	ERR1947702	NA	21946_6#182	3	Lees et al	Netherlands	Europe	53	Sensitive	Sensitive	Sensitive	Absent	Absent	-
2842STDY5643812	ERS367254	ERR461075	NA	11860_5#72	3	Lees et al	Netherlands	Europe	62	Sensitive	Sensitive	Sensitive	Absent	Absent	-
4484STDY6632448	ERS1460651	ERR1947444	NA	21903_8#290	3	Lees et al	Netherlands	Europe	62	Sensitive	Sensitive	Sensitive	Absent	Absent	-
4484STDY6808875	ERS1698800	ERR2305264	NA	22695_3#223	3	Lees et al	Netherlands	Europe	673	Sensitive	Sensitive	Sensitive	Absent	Absent	-
4484STDY6809074	ERS1698997	ERR2305366	NA	22695_3#325	3	Lees et al	Netherlands	Europe	62	Sensitive	Sensitive	Sensitive	Absent	Absent	-
4484STDY6632666	ERS1461716	ERR1947658	NA	21946_6#138	3	Lees et al	Netherlands	Europe	62	Sensitive	Sensitive	Sensitive	Absent	Absent	-
4484STDY6809035	ERS1698977	ERR2305327	NA	22695_3#286	3	Lees et al	Netherlands	Europe	62	Sensitive	Sensitive	Sensitive	Absent	Absent	-
2842STDY5644098	ERS367537	ERR461530	GCA_900025835	11861_2#65	3	Lees et al	Netherlands	Europe	53	Sensitive	Sensitive	Sensitive	Absent	Absent	-
4484STDY6808955	ERS1698879	ERR2305478	NA	22984_8#16	3	Lees et al	Netherlands	Europe	62	Sensitive	Resistant	Sensitive	Absent	Absent	-
4484STDY6632373	ERS1460578	ERR1947371	NA	21903_8#217	3	Lees et al	Netherlands	Europe	62	Sensitive	Sensitive	Sensitive	Absent	Absent	-
2842STDY5644253	ERS367690	ERR461577	GCA_900030015	11861_3#24	3	Lees et al	Netherlands	Europe	53	Sensitive	Sensitive	Sensitive	Absent	Absent	-
2842STDY5644118	ERS367557	ERR461549	GCA_900028185	11861_2#84	3	Lees et al	Netherlands	Europe	53	Sensitive	Sensitive	Sensitive	Absent	Absent	-
2842STDY5644501	ERS367932	ERR461270	GCA_900021245	11860_7#81	3	Lees et al	Netherlands	Europe	53	Sensitive	Sensitive	Sensitive	Absent	Absent	-
2842STDY5644552	ERS367982	ERR461320	NA	11860_8#37	3	Lees et al	Netherlands	Europe	62	Sensitive	Sensitive	Sensitive	Absent	Absent	-
4484STDY6808556	ERS1698484	ERR2305043	NA	22695_3#2	3	Lees et al	Netherlands	Europe	62	Sensitive	Sensitive	Sensitive	Absent	Absent	-
4484STDY6632178	ERS1460385	ERR1947180	NA	21903_8#26	3	Lees et al	Netherlands	Europe	62	Sensitive	Sensitive	Sensitive	Absent	Absent	-
4484STDY6632597	ERS1460799	ERR1947590	NA	21946_6#70	3	Lees et al	Netherlands	Europe	62	Sensitive	Sensitive	Sensitive	Absent	Absent	-
2842STDY5643658	ERS367101	ERR460930	NA	11860_4#14	3	Lees et al	Netherlands	Europe	62	Sensitive	Sensitive	Sensitive	Absent	Absent	-
4484STDY6808703	ERS1698630	ERR2305189	NA	22695_3#148	3	Lees et al	Netherlands	Europe	62	Sensitive	Sensitive	Sensitive	Absent	Absent	-
2842STDY5643918	ERS367359	ERR461177	GCA_900047665	11860_6#81	3	Lees et al	Netherlands	Europe	53	Sensitive	Sensitive	Sensitive	Absent	Absent	-
4484STDY6808587	ERS1698515	ERR2305074	NA	22695_3#33	3	Lees et al	Netherlands	Europe	62	Sensitive	Sensitive	Sensitive	Absent	Absent	-
4484STDY6808826	ERS1698752	ERR2305635	NA	23495_7#79	3	Lees et al	Netherlands	Europe	673	Sensitive	Sensitive	Sensitive	Absent	Absent	-
4484STDY6632031	ERS1460241	ERR1947767	NA	21946_6#247	3	Lees et al	Netherlands	Europe	62	Sensitive	Sensitive	Sensitive	Absent	Absent	-
4484STDY6809060	ERS1698983	ERR2305352	NA	22695_3#311	3	Lees et al	Netherlands	Europe	62	Sensitive	Sensitive	Sensitive	Absent	Absent	-
4484STDY6632468	ERS1460671	ERR1947464	NA	21903_8#310	3	Lees et al	Netherlands	Europe	62	Sensitive	Sensitive	Sensitive	Absent	Absent	-
2842STDY5753822	ERS409600	ERR564008	NA	12754_4#65	3	Lees et al	Netherlands	Europe	53	Sensitive	Sensitive	Sensitive	Absent	Absent	-
2842STDY5644522	ERS367952	ERR461290	GCA_900046495	11860_8#5	3	Lees et al	Netherlands	Europe	53	Sensitive	Sensitive	Sensitive	Absent	Absent	-
2842STDY5643880	ERS367321	ERR461140	NA	11860_6#44	3	Lees et al	Netherlands	Europe	53	Sensitive	Sensitive	Sensitive	Absent	Absent	-
2842STDY5644051	ERS367490	ERR461484	GCA_900023495	11861_2#17	3	Lees et al	Netherlands	Europe	717	Sensitive	Sensitive	Sensitive	Absent	Present	-
4484STDY6632325	ERS1460531	ERR1947325	NA	21903_8#171	3	Lees et al	Netherlands	Europe	62	Sensitive	Sensitive	Sensitive	Absent	Absent	-
4484STDY6632193	ERS1460400	ERR1947195	NA	21903_8#41	3	Lees et al	Netherlands	Europe	60	Sensitive	Sensitive	Sensitive	Absent	Absent	-
4484STDY6808945	ERS1698869	ERR2305468	NA	22984_8#6	3	Lees et al	Netherlands	Europe	62	Sensitive	Sensitive	Sensitive	Absent	Absent	-
4484STDY6632043	ERS1460252	ERR1947778	NA	21946_6#258	3	Lees et al	Netherlands	Europe	62	Sensitive	Sensitive	Sensitive	Absent	Absent	-
2842STDY5753112	ERS408897	ERR554858	GCA_900026535	12673_6#27	3	Lees et al	Netherlands	Europe	53	Sensitive	Sensitive	Sensitive	Absent	Absent	-
2842STDY5644374	ERS367810	ERR461696	GCA_900020145	11861_4#52	3	Lees et al	Netherlands	Europe	62	Resistant	Resistant	Sensitive	Absent	Absent	-
2842STDY5644208	ERS367646	ERR461899	GCA_900031775	11893_1#75	3	Lees et al	Netherlands	Europe	1012	Sensitive	Sensitive	Sensitive	Absent	Absent	-
4484STDY6808736	ERS1698663	ERR2305222	NA	22695_3#181	3	Lees et al	Netherlands	Europe	62	Resistant	Resistant	Sensitive	Absent	Absent	-
2842STDY5643941	ERS367381	ERR461384	GCA_900017405	11861_1#6	3	Lees et al	Netherlands	Europe	496	Sensitive	Sensitive	Sensitive	Absent	Absent	-
4484STDY6632069	ERS1460278	ERR1947803	NA	21946_6#283	3	Lees et al	Netherlands	Europe	62	Sensitive	Sensitive	Sensitive	Absent	Absent	-
2842STDY5643808	ERS367250	ERR461072	GCA_900046955	11860_5#69	3	Lees et al	Netherlands	Europe	8792~	Sensitive	Sensitive	Sensitive	Absent	Absent	-
2842STDY5643888	ERS367329	ERR461148	GCA_900046695	11860_6#52	3	Lees et al	Netherlands	Europe	100	Sensitive	Sensitive	Sensitive	Absent	Absent	-
4484STDY6632461	ERS1460664	ERR1947457	NA	21903_8#303	3	Lees et al	Netherlands	Europe	53	Sensitive	Sensitive	Sensitive	Absent	Absent	-
4484STDY6632050	ERS1460259	ERR1947784	NA	21946_6#264	3	Lees et al	Netherlands	Europe	62	Sensitive	Sensitive	Sensitive	Absent	Absent	-
4484STDY6632068	ERS1460277	ERR1947802	NA	21946_6#282	3	Lees et al	Netherlands	Europe	62	Sensitive	Resistant	Sensitive	Absent	Absent	-
2842STDY5644103	ERS367542	ERR461535	NA	11861_2#70	3	Lees et al	Netherlands	Europe	1110	Sensitive	Sensitive	Sensitive	Absent	Absent	-
2842STDY5644233	ERS367670	ERR461557	GCA_900040015	11861_3#3	3	Lees et al	Netherlands	Europe	717	Sensitive	Sensitive	Sensitive	Absent	Present	-
4484STDY6632374	ERS1460579	ERR1947372	NA	21903_8#218	3	Lees et al	Netherlands	Europe	62	Sensitive	Sensitive	Sensitive	Absent	Absent	-
4484STDY6808781	ERS1698707	ERR2305591	NA	23495_7#35	3	Lees et al	Netherlands	Europe	62	Sensitive	Sensitive	Sensitive	Absent	Absent	-
2842STDY5644239	ERS367676	ERR461563	GCA_900022825	11861_3#10	3	Lees et al	Netherlands	Europe	53	Sensitive	Sensitive	Sensitive	Absent	Absent	-
2842STDY5644665	ERS368093	ERR461793	NA	11861_5#56	3	Lees et al	Netherlands	Europe	53	Sensitive	Sensitive	Sensitive	Absent	Absent	-
4484STDY6808492	ERS1698421	ERR2305401	NA	22709_8#314	3	Lees et al	Netherlands	Europe	53	Sensitive	Sensitive	Sensitive	Absent	Absent	-
4484STDY6632700	ERS1461749	ERR1947690	NA	21946_6#170	3	Lees et al	Netherlands	Europe	60	Sensitive	Sensitive	Sensitive	Absent	Absent	-
2842STDY5643788	ERS367230	ERR461052	GCA_900024535	11860_5#49	3	Lees et al	Netherlands	Europe	62	Sensitive	Sensitive	Sensitive	Absent	Absent	-
2842STDY5753135	ERS408920	ERR554881	GCA_900027625	12673_6#50	3	Lees et al	Netherlands	Europe	53	Sensitive	Sensitive	Sensitive	Absent	Absent	-
2842STDY5644274	ERS367711	ERR461598	GCA_900031145	11861_3#47	3	Lees et al	Netherlands	Europe	62	Sensitive	Sensitive	Sensitive	Absent	Absent	-
4484STDY6632347	ERS1460552	ERR1947345	NA	21903_8#191	3	Lees et al	Netherlands	Europe	408	Sensitive	Sensitive	Sensitive	Absent	Absent	-
4484STDY6808902	ERS1698827	ERR2305291	NA	22695_3#250	3	Lees et al	Netherlands	Europe	62	Sensitive	Sensitive	Sensitive	Absent	Absent	-
4484STDY6632108	ERS1460317	ERR1947842	NA	21946_6#322	3	Lees et al	Netherlands	Europe	62	Sensitive	Sensitive	Sensitive	Absent	Absent	-
2842STDY5644619	ERS368048	ERR461748	GCA_900042345	11861_5#9	3	Lees et al	Netherlands	Europe	62	Sensitive	Sensitive	Sensitive	Absent	Absent	-
4484STDY6632681	ERS1461731	ERR1947672	NA	21946_6#152	3	Lees et al	Netherlands	Europe	62	Sensitive	Sensitive	Sensitive	Absent	Absent	-
4484STDY6808738	ERS1698665	ERR2305224	NA	22695_3#183	3	Lees et al	Netherlands	Europe	496	Sensitive	Sensitive	Sensitive	Absent	Absent	-
4484STDY6808903	ERS1698828	ERR2305292	NA	22695_3#251	3	Lees et al	Netherlands	Europe	673	Sensitive	Sensitive	Sensitive	Absent	Absent	-
4484STDY6632637	ERS1461687	ERR1947629	NA	21946_6#109	3	Lees et al	Netherlands	Europe	62	Sensitive	Sensitive	Sensitive	Absent	Absent	-
2842STDY5644282	ERS367719	ERR461606	GCA_900034995	11861_3#55	3	Lees et al	Netherlands	Europe	53	Sensitive	Sensitive	Sensitive	Absent	Absent	-
2842STDY5644020	ERS367460	ERR461457	GCA_900047685	11861_1#83	3	Lees et al	Netherlands	Europe	60	Sensitive	Sensitive	Sensitive	Absent	Absent	-
4484STDY6632274	ERS1460480	ERR1947274	NA	21903_8#120	3	Lees et al	Netherlands	Europe	60~	Sensitive	Sensitive	Sensitive	Absent	Absent	-
4484STDY6632354	ERS1460559	ERR1947352	NA	21903_8#198	3	Lees et al	Netherlands	Europe	62	Sensitive	Sensitive	Sensitive	Absent	Absent	-
2842STDY5643751	ERS367193	ERR461017	GCA_900046615	11860_5#12	3	Lees et al	Netherlands	Europe	53	Sensitive	Sensitive	Sensitive	Absent	Absent	-
2842STDY5644086	ERS367525	ERR461518	GCA_900023535	11861_2#53	3	Lees et al	Netherlands	Europe	62	Sensitive	Sensitive	Sensitive	Absent	Absent	-
4484STDY6632117	ERS1460326	ERR1947851	NA	21946_6#331	3	Lees et al	Netherlands	Europe	62	Sensitive	Sensitive	Sensitive	Absent	Absent	-
4484STDY6808688	ERS1698615	ERR2305174	NA	22695_3#133	3	Lees et al	Netherlands	Europe	62	Sensitive	Sensitive	Sensitive	Absent	Absent	-
2842STDY5643908	ERS367349	ERR461167	NA	11860_6#71	3	Lees et al	Netherlands	Europe	673	Sensitive	Sensitive	Sensitive	Absent	Absent	-
4484STDY6632241	ERS1460447	ERR1947242	NA	21903_8#88	3	Lees et al	Netherlands	Europe	62	Sensitive	Sensitive	Sensitive	Absent	Absent	-
4484STDY6808920	ERS1698845	ERR2305309	NA	22695_3#268	4	Lees et al	Netherlands	Europe	2081	Sensitive	Sensitive	Sensitive	Absent	Absent	-
4484STDY6632432	ERS1460635	ERR1947428	NA	21903_8#274	4	Lees et al	Netherlands	Europe	3017	Sensitive	Sensitive	Sensitive	Absent	Absent	-
2842STDY5644053	ERS367492	ERR461486	GCA_900042825	11861_2#19	4	Lees et al	Netherlands	Europe	876	Sensitive	Resistant	Intermediate	Present	Absent	-
4484STDY6808722	ERS1698649	ERR2305208	NA	22695_3#167	4	Lees et al	Netherlands	Europe	199	Sensitive	Sensitive	Sensitive	Absent	Absent	-
2842STDY5644461	ERS367892	ERR461230	NA	11860_7#40	4	Lees et al	Netherlands	Europe	199	Sensitive	Sensitive	Sensitive	Absent	Absent	-
4484STDY6632645	ERS1461695	ERR1947637	NA	21946_6#117	4	Lees et al	Netherlands	Europe	416	Sensitive	Sensitive	Sensitive	Absent	Absent	-
4484STDY6808646	ERS1698574	ERR2305133	NA	22695_3#92	4	Lees et al	Netherlands	Europe	199	Sensitive	Sensitive	Sensitive	Absent	Absent	-
2842STDY5644121	ERS367560	ERR461552	NA	11861_2#87	4	Lees et al	Netherlands	Europe	416	Sensitive	Sensitive	Sensitive	Absent	Absent	-
4484STDY6632073	ERS1460282	ERR1947807	NA	21946_6#287	4	Lees et al	Netherlands	Europe	3017	Sensitive	Sensitive	Sensitive	Absent	Absent	-
4484STDY6632652	ERS1461702	ERR1947644	NA	21946_6#124	4	Lees et al	Netherlands	Europe	3017	Sensitive	Sensitive	Sensitive	Absent	Absent	-
4484STDY6808706	ERS1698633	ERR2305192	NA	22695_3#151	4	Lees et al	Netherlands	Europe	3017	Sensitive	Sensitive	Sensitive	Absent	Absent	-
4484STDY6632669	ERS1461719	ERR1947661	NA	21946_6#141	4	Lees et al	Netherlands	Europe	3017	Sensitive	Sensitive	Sensitive	Absent	Absent	-
4484STDY6632287	ERS1460493	ERR1947287	NA	21903_8#133	4	Lees et al	Netherlands	Europe	199	Sensitive	Sensitive	Intermediate	Absent	Absent	-
2842STDY5644338	ERS367774	ERR461660	GCA_900030575	11861_4#14	4	Lees et al	Netherlands	Europe	199	Sensitive	Sensitive	Sensitive	Absent	Absent	-
2842STDY5644016	ERS367456	ERR450614	GCA_900027135	11822_8#42	4	Lees et al	Netherlands	Europe	199	Sensitive	Sensitive	Sensitive	Absent	Absent	-
4484STDY6632429	ERS1460632	ERR1947425	NA	21903_8#271	4	Lees et al	Netherlands	Europe	3017	Sensitive	Sensitive	Sensitive	Absent	Absent	-
4484STDY6808808	ERS1698734	ERR2305618	NA	23495_7#62	4	Lees et al	Netherlands	Europe	3017	Sensitive	Sensitive	Sensitive	Absent	Absent	-
4484STDY6632699	ERS1461748	ERR1947689	NA	21946_6#169	4	Lees et al	Netherlands	Europe	199	Sensitive	Sensitive	Sensitive	Absent	Absent	-
4484STDY6632110	ERS1460319	ERR1947844	NA	21946_6#324	4	Lees et al	Netherlands	Europe	200	Sensitive	Sensitive	Sensitive	Absent	Absent	-
4484STDY6632438	ERS1460641	ERR1947434	NA	21903_8#280	4	Lees et al	Netherlands	Europe	199	Sensitive	Sensitive	Sensitive	Absent	Absent	-
4484STDY6632376	ERS1460581	ERR1947374	NA	21903_8#220	4	Lees et al	Netherlands	Europe	3017	Sensitive	Sensitive	Sensitive	Absent	Absent	-
4484STDY6632501	ERS1460704	ERR1947497	NA	21903_8#343	4	Lees et al	Netherlands	Europe	3017	Sensitive	Sensitive	Sensitive	Absent	Absent	-
4484STDY6632011	ERS1460221	ERR1947747	NA	21946_6#227	4	Lees et al	Netherlands	Europe	3017	Sensitive	Sensitive	Sensitive	Absent	Absent	-
4484STDY6632433	ERS1460636	ERR1947429	NA	21903_8#275	4	Lees et al	Netherlands	Europe	199	Sensitive	Sensitive	Intermediate	Absent	Absent	-
4484STDY6808701	ERS1698628	ERR2305187	NA	22695_3#146	4	Lees et al	Netherlands	Europe	3017	Sensitive	Sensitive	Sensitive	Absent	Absent	-
4484STDY6808581	ERS1698509	ERR2305068	NA	22695_3#27	4	Lees et al	Netherlands	Europe	3017	Sensitive	Sensitive	Sensitive	Absent	Absent	-
4484STDY6631981	ERS1460191	ERR1947717	NA	21946_6#197	4	Lees et al	Netherlands	Europe	199	Sensitive	Sensitive	Sensitive	Absent	Absent	-
4484STDY6632290	ERS1460496	ERR1947290	NA	21903_8#136	4	Lees et al	Netherlands	Europe	199	Sensitive	Sensitive	Sensitive	Absent	Absent	-
4484STDY6632710	ERS1461759	ERR1947700	NA	21946_6#180	4	Lees et al	Netherlands	Europe	199	Sensitive	Sensitive	Sensitive	Absent	Absent	-
2842STDY5643887	ERS367328	ERR461147	NA	11860_6#51	4	Lees et al	Netherlands	Europe	416	Sensitive	Sensitive	Sensitive	Absent	Absent	-
2842STDY5644196	ERS367634	ERR461888	NA	11893_1#64	4	Lees et al	Netherlands	Europe	199	Sensitive	Sensitive	Sensitive	Absent	Absent	-
4484STDY6808609	ERS1698537	ERR2305096	NA	22695_3#55	4	Lees et al	Netherlands	Europe	2220	Sensitive	Sensitive	Sensitive	Absent	Absent	-
4484STDY6632607	ERS1461658	ERR1947600	NA	21946_6#80	4	Lees et al	Netherlands	Europe	416	Sensitive	Sensitive	Sensitive	Absent	Absent	-
4484STDY6808791	ERS1698717	ERR2305601	NA	23495_7#45	4	Lees et al	Netherlands	Europe	416	Sensitive	Sensitive	Sensitive	Absent	Absent	-
4484STDY6808835	ERS1698761	ERR2305644	NA	23495_7#88	4	Lees et al	Netherlands	Europe	199	Sensitive	Sensitive	Sensitive	Absent	Absent	-
4484STDY6808662	ERS1698589	ERR2305148	NA	22695_3#107	4	Lees et al	Netherlands	Europe	3017	Sensitive	Sensitive	Sensitive	Absent	Absent	-
4484STDY6808663	ERS1698590	ERR2305149	NA	22695_3#108	4	Lees et al	Netherlands	Europe	3017	Sensitive	Sensitive	Sensitive	Absent	Absent	-
2842STDY5644106	ERS367545	ERR461538	GCA_900023575	11861_2#73	4	Lees et al	Netherlands	Europe	199	Sensitive	Sensitive	Intermediate	Absent	Absent	-
2842STDY5644241	ERS367678	ERR461565	NA	11861_3#12	4	Lees et al	Netherlands	Europe	199	Sensitive	Sensitive	Sensitive	Absent	Absent	-
4484STDY6631957	ERS1460167	ERR1947147	NA	21903_6#177	4	Lees et al	Netherlands	Europe	3017	Sensitive	Sensitive	Sensitive	Absent	Absent	-
4484STDY6808487	ERS1698416	ERR2305396	NA	22709_8#309	4	Lees et al	Netherlands	Europe	3017	Sensitive	Sensitive	Sensitive	Absent	Absent	-
4484STDY6632591	ERS1460793	ERR1947585	NA	21946_6#65	4	Lees et al	Netherlands	Europe	199	Sensitive	Sensitive	Sensitive	Absent	Absent	-
4484STDY6632537	ERS1460739	ERR1947531	NA	21946_6#11	4	Lees et al	Netherlands	Europe	416	Sensitive	Sensitive	Sensitive	Absent	Absent	-
4484STDY6632424	ERS1460627	ERR1947420	NA	21903_8#266	4	Lees et al	Netherlands	Europe	199	Sensitive	Sensitive	Sensitive	Absent	Absent	-
4484STDY6808643	ERS1698571	ERR2305130	NA	22695_3#89	4	Lees et al	Netherlands	Europe	200	Sensitive	Sensitive	Sensitive	Absent	Absent	-
4484STDY6632625	ERS1461675	ERR1947617	NA	21946_6#97	4	Lees et al	Netherlands	Europe	416	Sensitive	Sensitive	Sensitive	Absent	Absent	-
4484STDY6632628	ERS1461678	ERR1947620	NA	21946_6#100	4	Lees et al	Netherlands	Europe	416	Sensitive	Sensitive	Sensitive	Absent	Absent	-
4484STDY6808591	ERS1698519	ERR2305078	NA	22695_3#37	4	Lees et al	Netherlands	Europe	199	Sensitive	Sensitive	Sensitive	Absent	Absent	-
4484STDY6631985	ERS1460195	ERR1947721	NA	21946_6#201	4	Lees et al	Netherlands	Europe	3017	Sensitive	Sensitive	Sensitive	Absent	Absent	-
2842STDY5644363	ERS367799	ERR461685	NA	11861_4#40	4	Lees et al	Netherlands	Europe	199	Sensitive	Sensitive	Sensitive	Absent	Absent	-
4484STDY6632265	ERS1460471	ERR1947265	NA	21903_8#111	4	Lees et al	Netherlands	Europe	199	Sensitive	Sensitive	Sensitive	Absent	Absent	-
4484STDY6632113	ERS1460322	ERR1947847	NA	21946_6#327	4	Lees et al	Netherlands	Europe	3017	Sensitive	Sensitive	Sensitive	Absent	Absent	-
4484STDY6808697	ERS1698624	ERR2305183	NA	22695_3#142	4	Lees et al	Netherlands	Europe	3017	Sensitive	Sensitive	Sensitive	Absent	Absent	-
4484STDY6632333	ERS1460538	ERR1947332	NA	21903_8#178	4	Lees et al	Netherlands	Europe	199	Sensitive	Sensitive	Sensitive	Absent	Absent	-
4484STDY6808618	ERS1698546	ERR2305105	NA	22695_3#64	4	Lees et al	Netherlands	Europe	1756	Sensitive	Sensitive	Intermediate	Absent	Absent	-
4484STDY6632238	ERS1460444	ERR1947239	NA	21903_8#85	4	Lees et al	Netherlands	Europe	416	Sensitive	Sensitive	Sensitive	Absent	Absent	-
4484STDY6632620	ERS1461670	ERR1947612	NA	21946_6#92	4	Lees et al	Netherlands	Europe	200	Sensitive	Sensitive	Sensitive	Absent	Absent	-
4484STDY6808912	ERS1698837	ERR2305301	NA	22695_3#260	4	Lees et al	Netherlands	Europe	3017	Sensitive	Sensitive	Sensitive	Absent	Absent	-
4484STDY6632158	ERS1460365	ERR1947160	NA	21903_8#6	4	Lees et al	Netherlands	Europe	3017	Sensitive	Sensitive	Sensitive	Absent	Absent	-
4484STDY6808590	ERS1698518	ERR2305077	NA	22695_3#36	4	Lees et al	Netherlands	Europe	3017	Sensitive	Sensitive	Sensitive	Absent	Absent	-
4484STDY6631999	ERS1460209	ERR1947735	NA	21946_6#215	4	Lees et al	Netherlands	Europe	3017	Sensitive	Sensitive	Sensitive	Absent	Absent	-
4484STDY6808876	ERS1698801	ERR2305265	NA	22695_3#224	4	Lees et al	Netherlands	Europe	199	Sensitive	Sensitive	Sensitive	Absent	Absent	-
4484STDY6632077	ERS1460286	ERR1947811	NA	21946_6#291	4	Lees et al	Netherlands	Europe	199	Sensitive	Sensitive	Sensitive	Absent	Absent	-
4484STDY6808620	ERS1698548	ERR2305107	NA	22695_3#66	4	Lees et al	Netherlands	Europe	199	Sensitive	Sensitive	Sensitive	Absent	Absent	-
4484STDY6808880	ERS1698805	ERR2305269	NA	22695_3#228	4	Lees et al	Netherlands	Europe	199	Sensitive	Sensitive	Sensitive	Absent	Absent	-
2842STDY5643769	ERS367211	ERR461034	GCA_900019485	11860_5#29	4	Lees et al	Netherlands	Europe	199	Sensitive	Sensitive	Sensitive	Absent	Absent	-
4484STDY6808508	ERS1698437	ERR2305417	NA	22709_8#330	4	Lees et al	Netherlands	Europe	199	Sensitive	Sensitive	Sensitive	Absent	Absent	-
4484STDY6632197	ERS1460404	ERR1947199	NA	21903_8#45	4	Lees et al	Netherlands	Europe	199	Sensitive	Sensitive	Sensitive	Absent	Absent	-
4484STDY6808828	ERS1698754	ERR2305637	NA	23495_7#81	4	Lees et al	Netherlands	Europe	199	Sensitive	Sensitive	Sensitive	Absent	Absent	-
4484STDY6632610	ERS1461661	ERR1947603	NA	21946_6#83	4	Lees et al	Netherlands	Europe	199	Sensitive	Sensitive	Sensitive	Absent	Absent	-
4484STDY6631956	ERS1460166	ERR1947146	NA	21903_6#176	4	Lees et al	Netherlands	Europe	3017	Sensitive	Sensitive	Sensitive	Absent	Absent	-
2842STDY5643931	ERS367372	ERR461190	NA	11860_6#94	4	Lees et al	Netherlands	Europe	199	Sensitive	Sensitive	Intermediate	Absent	Absent	-
4484STDY6632319	ERS1460525	ERR1947319	NA	21903_8#165	4	Lees et al	Netherlands	Europe	3017	Sensitive	Sensitive	Sensitive	Absent	Absent	-
4484STDY6632032	ERS1460242	ERR1947768	NA	21946_6#248	4	Lees et al	Netherlands	Europe	199	Sensitive	Sensitive	Sensitive	Absent	Absent	-
4484STDY6632504	ERS1460707	ERR1947500	NA	21903_8#346	4	Lees et al	Netherlands	Europe	199	Sensitive	Sensitive	Sensitive	Absent	Absent	-
4484STDY6632083	ERS1460292	ERR1947817	NA	21946_6#297	4	Lees et al	Netherlands	Europe	199	Sensitive	Sensitive	Sensitive	Absent	Absent	-
4484STDY6632532	ERS1460734	ERR1947526	NA	21946_6#6	4	Lees et al	Netherlands	Europe	411	Sensitive	Sensitive	Sensitive	Absent	Absent	-
4484STDY6632226	ERS1460433	ERR1947228	NA	21903_8#74	4	Lees et al	Netherlands	Europe	2220	Sensitive	Sensitive	Sensitive	Absent	Absent	-
4484STDY6808719	ERS1698646	ERR2305205	NA	22695_3#164	4	Lees et al	Netherlands	Europe	3017	Sensitive	Sensitive	Sensitive	Absent	Absent	-
2842STDY5643655	ERS367098	ERR460927	GCA_900032145	11860_4#11	4	Lees et al	Netherlands	Europe	199	Sensitive	Sensitive	Sensitive	Absent	Absent	-
4484STDY6632344	ERS1460549	ERR1947342	NA	21903_8#188	4	Lees et al	Netherlands	Europe	2081	Sensitive	Sensitive	Sensitive	Absent	Absent	-
4484STDY6631995	ERS1460205	ERR1947731	NA	21946_6#211	4	Lees et al	Netherlands	Europe	3017	Sensitive	Sensitive	Sensitive	Absent	Absent	-
4484STDY6632454	ERS1460657	ERR1947450	NA	21903_8#296	4	Lees et al	Netherlands	Europe	416	Sensitive	Sensitive	Sensitive	Absent	Absent	-
4484STDY6809036	ERS1698954	ERR2305328	NA	22695_3#287	4	Lees et al	Netherlands	Europe	3017	Sensitive	Sensitive	Sensitive	Absent	Absent	-
2842STDY5644031	ERS367470	ERR461465	NA	11861_1#92	4	Lees et al	Netherlands	Europe	199	Sensitive	Sensitive	Sensitive	Absent	Absent	-
4484STDY6632059	ERS1460268	ERR1947793	NA	21946_6#273	4	Lees et al	Netherlands	Europe	416	Sensitive	Sensitive	Sensitive	Absent	Absent	-
4484STDY6808844	ERS1698769	ERR2305233	NA	22695_3#192	4	Lees et al	Netherlands	Europe	411	Sensitive	Sensitive	Sensitive	Absent	Absent	-
4484STDY6632316	ERS1460522	ERR1947316	NA	21903_8#162	4	Lees et al	Netherlands	Europe	199	Sensitive	Sensitive	Sensitive	Absent	Absent	-
4484STDY6632632	ERS1461682	ERR1947624	NA	21946_6#104	4	Lees et al	Netherlands	Europe	199	Sensitive	Sensitive	Sensitive	Absent	Absent	-
4484STDY6632145	ERS1460352	ERR1947877	NA	21946_6#357	4	Lees et al	Netherlands	Europe	3017	Sensitive	Sensitive	Sensitive	Absent	Absent	-
4484STDY6632169	ERS1460376	ERR1947171	NA	21903_8#17	4	Lees et al	Netherlands	Europe	416	Sensitive	Sensitive	Sensitive	Absent	Absent	-
4484STDY6632267	ERS1460473	ERR1947267	NA	21903_8#113	4	Lees et al	Netherlands	Europe	3017	Sensitive	Sensitive	Sensitive	Absent	Absent	-
4484STDY6808953	ERS1698877	ERR2305476	NA	22984_8#14	4	Lees et al	Netherlands	Europe	2220	Sensitive	Sensitive	Sensitive	Absent	Absent	-
2842STDY5644018	ERS367458	ERR450615	GCA_900027145	11822_8#44	4	Lees et al	Netherlands	Europe	2220	Sensitive	Sensitive	Sensitive	Absent	Absent	-
2842STDY5644182	ERS367620	ERR461876	NA	11893_1#52	4	Lees et al	Netherlands	Europe	199	Sensitive	Sensitive	Sensitive	Absent	Absent	-
4484STDY6808792	ERS1698718	ERR2305602	NA	23495_7#46	4	Lees et al	Netherlands	Europe	416	Sensitive	Sensitive	Sensitive	Absent	Absent	-
2842STDY5644684	ERS368112	ERR461812	GCA_900029925	11861_5#75	4	Lees et al	Netherlands	Europe	199	Sensitive	Sensitive	Sensitive	Absent	Absent	-
4484STDY6808992	ERS1698916	ERR2305515	NA	22984_8#53	4	Lees et al	Netherlands	Europe	199	Sensitive	Sensitive	Sensitive	Absent	Absent	-
2842STDY5644180	ERS367618	ERR461874	GCA_900024015	11893_1#50	4	Lees et al	Netherlands	Europe	199	Sensitive	Sensitive	Sensitive	Absent	Absent	-
4484STDY6632026	ERS1460236	ERR1947762	NA	21946_6#242	4	Lees et al	Netherlands	Europe	1756	Sensitive	Sensitive	Intermediate	Absent	Absent	-
2842STDY5643917	ERS367358	ERR461176	GCA_900035345	11860_6#80	4	Lees et al	Netherlands	Europe	199	Sensitive	Sensitive	Sensitive	Absent	Absent	-
4484STDY6808560	ERS1698488	ERR2305047	NA	22695_3#6	4	Lees et al	Netherlands	Europe	1756	Sensitive	Sensitive	Intermediate	Absent	Absent	-
4484STDY6808780	ERS1698706	ERR2305590	NA	23495_7#34	4	Lees et al	Netherlands	Europe	199	Sensitive	Sensitive	Sensitive	Absent	Absent	-
4484STDY6808942	ERS1698866	ERR2305465	NA	22984_8#3	4	Lees et al	Netherlands	Europe	3017	Sensitive	Sensitive	Sensitive	Absent	Absent	-
4484STDY6808518	ERS1698440	ERR2305427	NA	22709_8#340	4	Lees et al	Netherlands	Europe	2081	Sensitive	Sensitive	Sensitive	Absent	Absent	-
2842STDY5643879	ERS367320	ERR461139	GCA_900046685	11860_6#42	4	Lees et al	Netherlands	Europe	2220	Sensitive	Sensitive	Sensitive	Absent	Absent	-
4484STDY6632584	ERS1460786	ERR1947578	NA	21946_6#58	4	Lees et al	Netherlands	Europe	3017	Sensitive	Sensitive	Sensitive	Absent	Absent	-
4484STDY6808636	ERS1698564	ERR2305123	NA	22695_3#82	4	Lees et al	Netherlands	Europe	3017	Sensitive	Sensitive	Sensitive	Absent	Absent	-
4484STDY6632183	ERS1460390	ERR1947185	NA	21903_8#31	4	Lees et al	Netherlands	Europe	199	Sensitive	Sensitive	Sensitive	Absent	Absent	-
4484STDY6808802	ERS1698728	ERR2305612	NA	23495_7#56	4	Lees et al	Netherlands	Europe	199	Sensitive	Sensitive	Sensitive	Absent	Absent	-
4484STDY6808944	ERS1698868	ERR2305467	NA	22984_8#5	4	Lees et al	Netherlands	Europe	3017	Sensitive	Sensitive	Sensitive	Absent	Absent	-
4484STDY6631992	ERS1460202	ERR1947728	NA	21946_6#208	4	Lees et al	Netherlands	Europe	199	Sensitive	Sensitive	Sensitive	Absent	Absent	-
4484STDY6632317	ERS1460523	ERR1947317	NA	21903_8#163	4	Lees et al	Netherlands	Europe	416	Sensitive	Sensitive	Sensitive	Absent	Absent	-
4484STDY6632075	ERS1460284	ERR1947809	NA	21946_6#289	4	Lees et al	Netherlands	Europe	199	Sensitive	Sensitive	Sensitive	Absent	Absent	-
4484STDY6809056	ERS1698979	ERR2305348	NA	22695_3#307	4	Lees et al	Netherlands	Europe	199	Resistant	Sensitive	Sensitive	Absent	Absent	-
4484STDY6632443	ERS1460646	ERR1947439	NA	21903_8#285	4	Lees et al	Netherlands	Europe	199	Sensitive	Sensitive	Sensitive	Absent	Absent	-
4484STDY6631984	ERS1460194	ERR1947720	NA	21946_6#200	4	Lees et al	Netherlands	Europe	416	Sensitive	Sensitive	Sensitive	Absent	Absent	-
2842STDY5644300	ERS367737	ERR461624	NA	11861_3#73	4	Lees et al	Netherlands	Europe	199	Sensitive	Sensitive	Sensitive	Absent	Absent	-
4484STDY6632139	ERS1460346	ERR1947871	NA	21946_6#351	4	Lees et al	Netherlands	Europe	416	Sensitive	Sensitive	Sensitive	Absent	Absent	-
4484STDY6632425	ERS1460628	ERR1947421	NA	21903_8#267	4	Lees et al	Netherlands	Europe	3017	Sensitive	Sensitive	Sensitive	Absent	Absent	-
4484STDY6632497	ERS1460700	ERR1947493	NA	21903_8#339	4	Lees et al	Netherlands	Europe	199	Sensitive	Sensitive	Sensitive	Absent	Absent	-
4484STDY6632382	ERS1460587	ERR1947380	NA	21903_8#226	4	Lees et al	Netherlands	Europe	3017	Sensitive	Sensitive	Sensitive	Absent	Absent	-
4484STDY6808753	ERS1698679	ERR2305563	NA	23495_7#7	4	Lees et al	Netherlands	Europe	199	Sensitive	Sensitive	Sensitive	Absent	Absent	-
2842STDY5643990	ERS367430	ERR461431	GCA_900025115	11861_1#56	4	Lees et al	Netherlands	Europe	416	Sensitive	Sensitive	Sensitive	Absent	Absent	-
4484STDY6632304	ERS1460510	ERR1947304	NA	21903_8#150	4	Lees et al	Netherlands	Europe	3700	Sensitive	Sensitive	Sensitive	Absent	Absent	-
4484STDY6808795	ERS1698721	ERR2305605	NA	23495_7#49	4	Lees et al	Netherlands	Europe	2081	Sensitive	Sensitive	Sensitive	Absent	Absent	-
4484STDY6632208	ERS1460415	ERR1947210	NA	21903_8#56	4	Lees et al	Netherlands	Europe	416	Sensitive	Sensitive	Sensitive	Absent	Absent	-
4484STDY6632405	ERS1460610	ERR1947403	NA	21903_8#249	4	Lees et al	Netherlands	Europe	2081	Sensitive	Sensitive	Sensitive	Absent	Absent	-
4484STDY6632300	ERS1460506	ERR1947300	NA	21903_8#146	4	Lees et al	Netherlands	Europe	416	Sensitive	Sensitive	Sensitive	Absent	Absent	-
4484STDY6632106	ERS1460315	ERR1947840	NA	21946_6#320	4	Lees et al	Netherlands	Europe	2220	Sensitive	Sensitive	Sensitive	Absent	Absent	-
2842STDY5644025	ERS367465	ERR502540	GCA_900025135	12273_1#84	4	Lees et al	Netherlands	Europe	199	Sensitive	Sensitive	Sensitive	Absent	Absent	-
4484STDY6808768	ERS1698694	ERR2305578	NA	23495_7#22	4	Lees et al	Netherlands	Europe	416	Sensitive	Sensitive	Sensitive	Absent	Absent	-
4484STDY6632223	ERS1460430	ERR1947225	NA	21903_8#71	4	Lees et al	Netherlands	Europe	2220	Sensitive	Sensitive	Sensitive	Absent	Absent	-
2842STDY5753093	ERS408878	ERR554839	GCA_900027175	12673_6#8	4	Lees et al	Netherlands	Europe	199	Sensitive	Sensitive	Sensitive	Absent	Absent	-
4484STDY6632647	ERS1461697	ERR1947639	NA	21946_6#119	4	Lees et al	Netherlands	Europe	3017	Sensitive	Sensitive	Sensitive	Absent	Absent	-
2842STDY5644629	ERS368058	ERR461758	NA	11861_5#19	4	Lees et al	Netherlands	Europe	199	Sensitive	Sensitive	Sensitive	Absent	Absent	-
2842STDY5644581	ERS368011	ERR461349	GCA_900021295	11860_8#67	4	Lees et al	Netherlands	Europe	199	Sensitive	Sensitive	Sensitive	Absent	Absent	-
4484STDY6632490	ERS1460693	ERR1947486	NA	21903_8#332	4	Lees et al	Netherlands	Europe	416	Sensitive	Sensitive	Sensitive	Absent	Absent	-
4484STDY6632294	ERS1460500	ERR1947294	NA	21903_8#140	4	Lees et al	Netherlands	Europe	199	Sensitive	Sensitive	Sensitive	Absent	Absent	-
4484STDY6808531	ERS1698453	ERR2305440	NA	22709_8#353	4	Lees et al	Netherlands	Europe	416	Sensitive	Sensitive	Sensitive	Absent	Absent	-
4484STDY6632611	ERS1461662	ERR1947604	NA	21946_6#84	4	Lees et al	Netherlands	Europe	199	Sensitive	Sensitive	Sensitive	Absent	Absent	-
4484STDY6809054	ERS1698972	ERR2305346	NA	22695_3#305	4	Lees et al	Netherlands	Europe	199	Sensitive	Sensitive	Sensitive	Absent	Absent	-
4484STDY6632305	ERS1460511	ERR1947305	NA	21903_8#151	4	Lees et al	Netherlands	Europe	13185	Sensitive	Sensitive	Sensitive	Absent	Absent	-
4484STDY6632387	ERS1460592	ERR1947385	NA	21903_8#231	4	Lees et al	Netherlands	Europe	3017	Sensitive	Sensitive	Sensitive	Absent	Absent	-
4484STDY6632453	ERS1460656	ERR1947449	NA	21903_8#295	4	Lees et al	Netherlands	Europe	416	Sensitive	Sensitive	Sensitive	Absent	Absent	-
4484STDY6808656	ERS1698583	ERR2305142	NA	22695_3#101	4	Lees et al	Netherlands	Europe	199	Sensitive	Sensitive	Sensitive	Absent	Absent	-
4484STDY6632466	ERS1460669	ERR1947462	NA	21903_8#308	4	Lees et al	Netherlands	Europe	3012	Sensitive	Sensitive	Sensitive	Absent	Absent	-
4484STDY6808574	ERS1698502	ERR2305061	NA	22695_3#20	4	Lees et al	Netherlands	Europe	876	Sensitive	Resistant	Intermediate	Present	Absent	-
4484STDY6632348	ERS1460553	ERR1947346	NA	21903_8#192	4	Lees et al	Netherlands	Europe	3017	Sensitive	Sensitive	Sensitive	Absent	Absent	-
4484STDY6632213	ERS1460420	ERR1947215	NA	21903_8#61	4	Lees et al	Netherlands	Europe	199	Sensitive	Sensitive	Sensitive	Absent	Absent	-
4484STDY6632603	ERS1461654	ERR1947596	NA	21946_6#76	4	Lees et al	Netherlands	Europe	3017	Sensitive	Sensitive	Sensitive	Absent	Absent	-
4484STDY6632567	ERS1460769	ERR1947561	NA	21946_6#41	4	Lees et al	Netherlands	Europe	199	Sensitive	Sensitive	Sensitive	Absent	Absent	-
4484STDY6632653	ERS1461703	ERR1947645	NA	21946_6#125	4	Lees et al	Netherlands	Europe	2081	Sensitive	Sensitive	Sensitive	Absent	Absent	-
2842STDY5643980	ERS367420	ERR461421	GCA_900017885	11861_1#46	4	Lees et al	Netherlands	Europe	199	Sensitive	Sensitive	Sensitive	Absent	Absent	-
4484STDY6809010	ERS1698934	ERR2305533	NA	22984_8#71	4	Lees et al	Netherlands	Europe	2081	Sensitive	Sensitive	Sensitive	Absent	Absent	-
4484STDY6632082	ERS1460291	ERR1947816	NA	21946_6#296	4	Lees et al	Netherlands	Europe	1756	Sensitive	Sensitive	Intermediate	Absent	Absent	-
4484STDY6808991	ERS1698915	ERR2305514	NA	22984_8#52	4	Lees et al	Netherlands	Europe	1756	Sensitive	Sensitive	Intermediate	Absent	Absent	-
4484STDY6808921	ERS1698846	ERR2305310	NA	22695_3#269	4	Lees et al	Netherlands	Europe	2081	Sensitive	Sensitive	Sensitive	Absent	Absent	-
4484STDY6808464	ERS1698393	ERR2305373	NA	22709_8#286	4	Lees et al	Netherlands	Europe	3017	Sensitive	Sensitive	Sensitive	Absent	Absent	-
2842STDY5644541	ERS367971	ERR461309	NA	11860_8#25	4	Lees et al	Netherlands	Europe	199	Sensitive	Sensitive	Sensitive	Absent	Absent	-
4484STDY6632343	ERS1460548	ERR1947341	NA	21903_8#187	4	Lees et al	Netherlands	Europe	2081	Sensitive	Sensitive	Sensitive	Absent	Absent	-
4484STDY6808715	ERS1698642	ERR2305201	NA	22695_3#160	4	Lees et al	Netherlands	Europe	3017	Sensitive	Sensitive	Sensitive	Absent	Absent	-
4484STDY6632648	ERS1461698	ERR1947640	NA	21946_6#120	4	Lees et al	Netherlands	Europe	3017	Sensitive	Sensitive	Sensitive	Absent	Absent	-
4484STDY6632609	ERS1461660	ERR1947602	NA	21946_6#82	4	Lees et al	Netherlands	Europe	3017	Sensitive	Sensitive	Sensitive	Absent	Absent	-
2842STDY5753142	ERS408927	ERR554888	GCA_900023835	12673_6#57	4	Lees et al	Netherlands	Europe	3017	Sensitive	Sensitive	Sensitive	Absent	Absent	-
4484STDY6808682	ERS1698609	ERR2305168	NA	22695_3#127	4	Lees et al	Netherlands	Europe	3700	Sensitive	Sensitive	Sensitive	Absent	Absent	-
2842STDY5644250	ERS367687	ERR461574	NA	11861_3#21	4	Lees et al	Netherlands	Europe	199	Sensitive	Sensitive	Sensitive	Absent	Absent	-
4484STDY6808933	ERS1698858	ERR2305322	NA	22695_3#281	4	Lees et al	Netherlands	Europe	416	Sensitive	Sensitive	Sensitive	Absent	Absent	-
2842STDY5644211	ERS367649	ERR461902	NA	11893_1#78	4	Lees et al	Netherlands	Europe	199	Sensitive	Sensitive	Sensitive	Absent	Absent	-
4484STDY6632608	ERS1461659	ERR1947601	NA	21946_6#81	4	Lees et al	Netherlands	Europe	3017	Sensitive	Sensitive	Sensitive	Absent	Absent	-
4484STDY6632694	ERS1461743	ERR1947684	NA	21946_6#164	4	Lees et al	Netherlands	Europe	419	Sensitive	Sensitive	Sensitive	Absent	Absent	-
4484STDY6632435	ERS1460638	ERR1947431	NA	21903_8#277	4	Lees et al	Netherlands	Europe	416	Sensitive	Sensitive	Sensitive	Absent	Absent	-
4484STDY6808477	ERS1698406	ERR2305386	NA	22709_8#299	4	Lees et al	Netherlands	Europe	199	Sensitive	Sensitive	Sensitive	Absent	Absent	-
4484STDY6808539	ERS1698468	ERR2305448	NA	22709_8#361	4	Lees et al	Netherlands	Europe	3017	Sensitive	Sensitive	Sensitive	Absent	Absent	-
4484STDY6808579	ERS1698507	ERR2305066	NA	22695_3#25	4	Lees et al	Netherlands	Europe	876	Sensitive	Resistant	Intermediate	Present	Absent	-
4484STDY6631994	ERS1460204	ERR1947730	NA	21946_6#210	4	Lees et al	Netherlands	Europe	1756	Sensitive	Sensitive	Intermediate	Absent	Absent	-
4484STDY6809052	ERS1698970	ERR2305344	NA	22695_3#303	4	Lees et al	Netherlands	Europe	3017	Sensitive	Sensitive	Sensitive	Absent	Absent	-
4484STDY6809047	ERS1698965	ERR2305339	NA	22695_3#298	4	Lees et al	Netherlands	Europe	3017	Sensitive	Sensitive	Sensitive	Absent	Absent	-
4484STDY6632095	ERS1460304	ERR1947829	NA	21946_6#309	4	Lees et al	Netherlands	Europe	200	Sensitive	Sensitive	Sensitive	Absent	Absent	-
4484STDY6632271	ERS1460477	ERR1947271	NA	21903_8#117	4	Lees et al	Netherlands	Europe	199	Sensitive	Sensitive	Sensitive	Absent	Absent	-
4484STDY6632067	ERS1460276	ERR1947801	NA	21946_6#281	4	Lees et al	Netherlands	Europe	199	Sensitive	Sensitive	Intermediate	Absent	Absent	-
4484STDY6808635	ERS1698563	ERR2305122	NA	22695_3#81	4	Lees et al	Netherlands	Europe	199	Sensitive	Sensitive	Sensitive	Absent	Absent	-
2842STDY5644549	ERS367979	ERR461317	GCA_900021235	11860_8#34	4	Lees et al	Netherlands	Europe	199	Sensitive	Sensitive	Sensitive	Absent	Absent	-
4484STDY6632272	ERS1460478	ERR1947272	NA	21903_8#118	4	Lees et al	Netherlands	Europe	199	Sensitive	Sensitive	Sensitive	Absent	Absent	-
2842STDY5753101	ERS408886	ERR554847	GCA_900027185	12673_6#16	4	Lees et al	Netherlands	Europe	3017	Sensitive	Sensitive	Sensitive	Absent	Absent	-
2842STDY5644225	ERS367662	ERR496939	GCA_900027595	12216_4#90	4	Lees et al	Netherlands	Europe	200	Sensitive	Sensitive	Sensitive	Absent	Absent	-
4484STDY6808603	ERS1698531	ERR2305090	NA	22695_3#49	4	Lees et al	Netherlands	Europe	199	Sensitive	Sensitive	Sensitive	Absent	Absent	-
4484STDY6632644	ERS1461694	ERR1947636	NA	21946_6#116	4	Lees et al	Netherlands	Europe	416	Sensitive	Sensitive	Sensitive	Absent	Absent	-
4484STDY6632170	ERS1460377	ERR1947172	NA	21903_8#18	4	Lees et al	Netherlands	Europe	416	Sensitive	Sensitive	Sensitive	Absent	Absent	-
4484STDY6808526	ERS1698448	ERR2305435	NA	22709_8#348	4	Lees et al	Netherlands	Europe	199	Sensitive	Sensitive	Sensitive	Absent	Absent	-
2842STDY5753086	ERS408871	ERR554832	GCA_900021635	12673_6#1	4	Lees et al	Netherlands	Europe	199	Sensitive	Sensitive	Sensitive	Absent	Absent	-
4484STDY6632651	ERS1461701	ERR1947643	NA	21946_6#123	4	Lees et al	Netherlands	Europe	199	Sensitive	Sensitive	Sensitive	Absent	Absent	-
4484STDY6808712	ERS1698639	ERR2305198	NA	22695_3#157	4	Lees et al	Netherlands	Europe	3012	Sensitive	Sensitive	Sensitive	Absent	Absent	-
2842STDY5644376	ERS367812	ERR461698	GCA_900025865	11861_4#54	4	Lees et al	Netherlands	Europe	199	Sensitive	Sensitive	Sensitive	Absent	Absent	-
4484STDY6632190	ERS1460397	ERR1947192	NA	21903_8#38	4	Lees et al	Netherlands	Europe	199	Sensitive	Sensitive	Sensitive	Absent	Absent	-
4484STDY6632704	ERS1461753	ERR1947694	NA	21946_6#174	4	Lees et al	Netherlands	Europe	199	Sensitive	Sensitive	Sensitive	Absent	Absent	-
4484STDY6808895	ERS1698820	ERR2305284	NA	22695_3#243	4	Lees et al	Netherlands	Europe	3017	Sensitive	Sensitive	Sensitive	Absent	Absent	-
4484STDY6808545	ERS1698474	ERR2305454	NA	22709_8#367	4	Lees et al	Netherlands	Europe	199	Sensitive	Sensitive	Sensitive	Absent	Absent	-
2842STDY5644258	ERS367695	ERR461582	GCA_900025885	11861_3#29	4	Lees et al	Netherlands	Europe	199	Sensitive	Sensitive	Sensitive	Absent	Absent	-
2842STDY5644203	ERS367641	ERR461894	GCA_900032195	11893_1#70	4	Lees et al	Netherlands	Europe	199~	Sensitive	Sensitive	Sensitive	Absent	Absent	-
4484STDY6632580	ERS1460782	ERR1947574	NA	21946_6#54	4	Lees et al	Netherlands	Europe	3017	Sensitive	Sensitive	Sensitive	Absent	Absent	-
4484STDY6631976	ERS1460186	ERR1947712	NA	21946_6#192	4	Lees et al	Netherlands	Europe	416	Sensitive	Sensitive	Sensitive	Absent	Absent	-
4484STDY6632505	ERS1460708	ERR1947501	NA	21903_8#347	4	Lees et al	Netherlands	Europe	199	Sensitive	Sensitive	Sensitive	Absent	Absent	-
4484STDY6632421	ERS1460625	ERR1947418	NA	21903_8#264	4	Lees et al	Netherlands	Europe	416	Sensitive	Sensitive	Sensitive	Absent	Absent	-
4484STDY6632441	ERS1460644	ERR1947437	NA	21903_8#283	4	Lees et al	Netherlands	Europe	3017	Sensitive	Sensitive	Sensitive	Absent	Absent	-
4484STDY6632044	ERS1460253	ERR1947779	NA	21946_6#259	4	Lees et al	Netherlands	Europe	199	Sensitive	Sensitive	Sensitive	Absent	Absent	-
2842STDY5644637	ERS368066	ERR461766	GCA_900047595	11861_5#27	4	Lees et al	Netherlands	Europe	199	Sensitive	Sensitive	Sensitive	Absent	Absent	-
4484STDY6632485	ERS1460688	ERR1947481	NA	21903_8#327	4	Lees et al	Netherlands	Europe	2220	Sensitive	Sensitive	Sensitive	Absent	Absent	-
4484STDY6808575	ERS1698503	ERR2305062	NA	22695_3#21	4	Lees et al	Netherlands	Europe	3017	Sensitive	Sensitive	Sensitive	Absent	Absent	-
4484STDY6632475	ERS1460678	ERR1947471	NA	21903_8#317	4	Lees et al	Netherlands	Europe	199	Sensitive	Sensitive	Sensitive	Absent	Absent	-
4484STDY6632128	ERS1460336	ERR1947861	NA	21946_6#341	4	Lees et al	Netherlands	Europe	199	Sensitive	Sensitive	Sensitive	Absent	Absent	-
4484STDY6808577	ERS1698505	ERR2305064	NA	22695_3#23	4	Lees et al	Netherlands	Europe	2220	Sensitive	Sensitive	Sensitive	Absent	Absent	-
4484STDY6632544	ERS1460746	ERR1947538	NA	21946_6#18	4	Lees et al	Netherlands	Europe	199	Sensitive	Sensitive	Sensitive	Absent	Absent	-
4484STDY6808483	ERS1698412	ERR2305392	NA	22709_8#305	4	Lees et al	Netherlands	Europe	199	Sensitive	Sensitive	Sensitive	Absent	Absent	-
4484STDY6808540	ERS1698469	ERR2305449	NA	22709_8#362	4	Lees et al	Netherlands	Europe	199	Sensitive	Sensitive	Sensitive	Absent	Absent	-
4484STDY6632121	ERS1460329	ERR1947854	NA	21946_6#334	5	Lees et al	Netherlands	Europe	1131	Sensitive	Sensitive	Resistant	Absent	Absent	-
4484STDY6808729	ERS1698656	ERR2305215	NA	22695_3#174	5	Lees et al	Netherlands	Europe	2777	Resistant	Resistant	Resistant	Absent	Absent	-
4484STDY6808507	ERS1698436	ERR2305416	NA	22709_8#329	5	Lees et al	Netherlands	Europe	1131	Sensitive	Sensitive	Resistant	Absent	Absent	-
4484STDY6632707	ERS1461756	ERR1947697	NA	21946_6#177	5	Lees et al	Netherlands	Europe	2372	Resistant	Resistant	Resistant	Absent	Absent	-
4484STDY6808803	ERS1698729	ERR2305613	NA	23495_7#57	5	Lees et al	Netherlands	Europe	2372	Resistant	Resistant	Resistant	Absent	Absent	-
4484STDY6808952	ERS1698876	ERR2305475	NA	22984_8#13	5	Lees et al	Netherlands	Europe	1349	Resistant	Resistant	Resistant	Absent	Absent	-
4484STDY6632663	ERS1461713	ERR1947655	NA	21946_6#135	5	Lees et al	Netherlands	Europe	1131	Sensitive	Sensitive	Resistant	Absent	Absent	-
2842STDY5644384	ERS367820	ERR461706	NA	11861_4#62	5	Lees et al	Netherlands	Europe	2464~	Sensitive	Resistant	Resistant	Absent	Absent	-
4484STDY6632100	ERS1460309	ERR1947834	NA	21946_6#314	5	Lees et al	Netherlands	Europe	1131	Sensitive	Sensitive	Resistant	Absent	Absent	-
2842STDY5644152	ERS367590	ERR461847	GCA_900023615	11893_1#21	5	Lees et al	Netherlands	Europe	1349	Resistant	Resistant	Resistant	Absent	Absent	-
4484STDY6809058	ERS1698981	ERR2305350	NA	22695_3#309	5	Lees et al	Netherlands	Europe	338	Sensitive	Sensitive	Resistant	Absent	Present	-
2842STDY5644219	ERS367657	ERR461909	GCA_900032205	11893_1#86	5	Lees et al	Netherlands	Europe	13087	Resistant	Resistant	Resistant	Absent	Absent	-
2842STDY5644171	ERS367609	ERR461865	GCA_900022325	11893_1#40	6	Lees et al	Netherlands	Europe	162	Sensitive	Sensitive	Sensitive	Absent	Absent	-
2842STDY5644578	ERS368008	ERR461346	GCA_900018825	11860_8#64	6	Lees et al	Netherlands	Europe	162~	Sensitive	Sensitive	Sensitive	Absent	Absent	-
2842STDY5753141	ERS408926	ERR554887	GCA_900024675	12673_6#56	6	Lees et al	Netherlands	Europe	162	Sensitive	Sensitive	Sensitive	Absent	Absent	-
4484STDY6632244	ERS1460450	ERR1947245	NA	21903_8#91	6	Lees et al	Netherlands	Europe	162	Sensitive	Sensitive	Sensitive	Absent	Absent	-
2842STDY5644661	ERS368089	ERR461789	NA	11861_5#52	6	Lees et al	Netherlands	Europe	162	Sensitive	Sensitive	Sensitive	Absent	Absent	-
2842STDY5644585	ERS368015	ERR461353	GCA_900019435	11860_8#71	6	Lees et al	Netherlands	Europe	162	Sensitive	Sensitive	Sensitive	Absent	Absent	-
2842STDY5643893	ERS367334	ERR450609	GCA_900031745	11822_8#37	6	Lees et al	Netherlands	Europe	8138	Sensitive	Sensitive	Sensitive	Absent	Absent	-
2842STDY5644402	ERS367836	ERR461722	NA	11861_4#78	6	Lees et al	Netherlands	Europe	162	Sensitive	Sensitive	Sensitive	Absent	Absent	-
2842STDY5644407	ERS367841	ERR461727	GCA_900018985	11861_4#83	6	Lees et al	Netherlands	Europe	1357	Resistant	Resistant	Resistant	Absent	Absent	-
2842STDY5644602	ERS368032	ERR461370	GCA_900036515	11860_8#88	6	Lees et al	Netherlands	Europe	162	Sensitive	Sensitive	Sensitive	Absent	Absent	-
2842STDY5644450	ERS367882	ERR461220	GCA_900020695	11860_7#29	6	Lees et al	Netherlands	Europe	162	Sensitive	Sensitive	Sensitive	Absent	Absent	-
4484STDY6808611	ERS1698539	ERR2305098	NA	22695_3#57	6	Lees et al	Netherlands	Europe	162	Sensitive	Sensitive	Sensitive	Absent	Absent	-
2842STDY5644630	ERS368059	ERR461759	GCA_900016915	11861_5#20	6	Lees et al	Netherlands	Europe	162	Sensitive	Sensitive	Sensitive	Absent	Absent	-
2842STDY5644154	ERS367592	ERR461849	GCA_900025185	11893_1#23	6	Lees et al	Netherlands	Europe	156	Resistant	Resistant	Resistant	Absent	Absent	-
2842STDY5644197	ERS367635	ERR461889	GCA_900028215	11893_1#65	6	Lees et al	Netherlands	Europe	162	Sensitive	Sensitive	Sensitive	Absent	Absent	-
2842STDY5644533	ERS367963	ERR461301	NA	11860_8#17	6	Lees et al	Netherlands	Europe	162	Sensitive	Sensitive	Sensitive	Absent	Absent	-
2842STDY5644371	ERS367807	ERR461693	NA	11861_4#49	6	Lees et al	Netherlands	Europe	162	Sensitive	Sensitive	Sensitive	Absent	Absent	-
2842STDY5644485	ERS367916	ERR461254	GCA_900033455	11860_7#65	6	Lees et al	Netherlands	Europe	162	Sensitive	Sensitive	Sensitive	Absent	Absent	-
4484STDY6808565	ERS1698493	ERR2305052	NA	22695_3#11	6	Lees et al	Netherlands	Europe	1557	Sensitive	Resistant	Sensitive	Absent	Absent	-
2842STDY5644477	ERS367908	ERR461246	NA	11860_7#57	6	Lees et al	Netherlands	Europe	162	Sensitive	Sensitive	Sensitive	Absent	Absent	-
2842STDY5644570	ERS368000	ERR461338	GCA_900046535	11860_8#56	6	Lees et al	Netherlands	Europe	162	Sensitive	Sensitive	Sensitive	Absent	Absent	-
2842STDY5643789	ERS367231	ERR461053	GCA_900025805	11860_5#50	6	Lees et al	Netherlands	Europe	162	Sensitive	Sensitive	Sensitive	Absent	Absent	-
4484STDY6808949	ERS1698873	ERR2305472	NA	22984_8#10	6	Lees et al	Netherlands	Europe	162	Resistant	Resistant	Sensitive	Absent	Absent	-
2842STDY5643856	ERS367297	ERR461116	GCA_900047645	11860_6#18	6	Lees et al	Netherlands	Europe	162	Sensitive	Sensitive	Sensitive	Absent	Absent	-
2842STDY5644409	ERS367843	ERR461729	GCA_900036055	11861_4#85	6	Lees et al	Netherlands	Europe	162~	Sensitive	Sensitive	Sensitive	Absent	Absent	-
2842STDY5644648	ERS368077	ERR461777	GCA_900046565	11861_5#39	6	Lees et al	Netherlands	Europe	162	Sensitive	Sensitive	Sensitive	Absent	Absent	-
4484STDY6808891	ERS1698816	ERR2305280	NA	22695_3#239	6	Lees et al	Netherlands	Europe	162	Resistant	Resistant	Sensitive	Absent	Absent	-
2842STDY5643987	ERS367427	ERR461428	GCA_900018495	11861_1#53	6	Lees et al	Netherlands	Europe	162	Sensitive	Sensitive	Sensitive	Absent	Absent	-
2842STDY5644631	ERS368060	ERR461760	NA	11861_5#21	6	Lees et al	Netherlands	Europe	162	Sensitive	Sensitive	Sensitive	Absent	Absent	-
2842STDY5644424	ERS367857	ERR461195	GCA_900023655	11860_7#3	6	Lees et al	Netherlands	Europe	162	Sensitive	Sensitive	Sensitive	Absent	Absent	-
4484STDY6809041	ERS1698959	ERR2305333	NA	22695_3#292	6	Lees et al	Netherlands	Europe	162	Resistant	Resistant	Sensitive	Absent	Absent	-
4484STDY6808610	ERS1698538	ERR2305097	NA	22695_3#56	6	Lees et al	Netherlands	Europe	162	Sensitive	Sensitive	Sensitive	Absent	Absent	-
2842STDY5643768	ERS367210	ERR461033	GCA_900021605	11860_5#28	6	Lees et al	Netherlands	Europe	8138	Sensitive	Sensitive	Sensitive	Absent	Absent	-
2842STDY5644215	ERS367653	ERR461905	GCA_900034055	11893_1#82	6	Lees et al	Netherlands	Europe	162	Sensitive	Sensitive	Sensitive	Absent	Absent	-
2842STDY5643865	ERS367306	ERR461125	GCA_900023345	11860_6#27	6	Lees et al	Netherlands	Europe	8138	Sensitive	Sensitive	Sensitive	Absent	Absent	-
2842STDY5881939	ERS515203	ERR716233	GCA_900025955	14412_3#56	6	Lees et al	Netherlands	Europe	2306~	Resistant	Resistant	Resistant	Absent	Present	-
4484STDY6632018	ERS1460228	ERR1947754	NA	21946_6#234	6	Lees et al	Netherlands	Europe	162	Sensitive	Sensitive	Sensitive	Absent	Absent	-
2842STDY5644589	ERS368019	ERR461357	GCA_900023285	11860_8#75	6	Lees et al	Netherlands	Europe	162	Sensitive	Sensitive	Sensitive	Absent	Absent	-
2842STDY5644639	ERS368068	ERR461768	NA	11861_5#29	6	Lees et al	Netherlands	Europe	162	Sensitive	Sensitive	Sensitive	Absent	Absent	-
2842STDY5644468	ERS367899	ERR461237	GCA_900024645	11860_7#48	6	Lees et al	Netherlands	Europe	162	Sensitive	Sensitive	Sensitive	Absent	Absent	-
2842STDY5644580	ERS368010	ERR461348	NA	11860_8#66	6	Lees et al	Netherlands	Europe	162	Sensitive	Sensitive	Sensitive	Absent	Absent	-
2842STDY5644445	ERS367877	ERR461215	NA	11860_7#24	6	Lees et al	Netherlands	Europe	162	Sensitive	Sensitive	Sensitive	Absent	Absent	-
2842STDY5644395	ERS367829	ERR461715	GCA_900022305	11861_4#71	6	Lees et al	Netherlands	Europe	162	Sensitive	Sensitive	Sensitive	Absent	Absent	-
2842STDY5644573	ERS368003	ERR461341	GCA_900018395	11860_8#59	6	Lees et al	Netherlands	Europe	162	Sensitive	Sensitive	Sensitive	Absent	Absent	-
2842STDY5644042	ERS367481	ERR461475	NA	11861_2#7	6	Lees et al	Netherlands	Europe	162	Sensitive	Sensitive	Sensitive	Absent	Absent	-
2842STDY5644540	ERS367970	ERR461308	NA	11860_8#24	6	Lees et al	Netherlands	Europe	162	Sensitive	Sensitive	Sensitive	Absent	Absent	-
4484STDY6809028	ERS1698952	ERR2305551	NA	22984_8#89	6	Lees et al	Netherlands	Europe	156	Resistant	Resistant	Resistant	Absent	Absent	-
2842STDY5644627	ERS368056	ERR461756	GCA_900046555	11861_5#17	6	Lees et al	Netherlands	Europe	162	Sensitive	Sensitive	Sensitive	Absent	Absent	-
2842STDY5644535	ERS367965	ERR461303	GCA_900046515	11860_8#19	6	Lees et al	Netherlands	Europe	162	Sensitive	Sensitive	Sensitive	Absent	Absent	-
2842STDY5643852	ERS367293	ERR461112	GCA_900021625	11860_6#14	6	Lees et al	Netherlands	Europe	162	Sensitive	Sensitive	Sensitive	Absent	Absent	-
2842STDY5643784	ERS367226	ERR461048	GCA_900016985	11860_5#45	6	Lees et al	Netherlands	Europe	162	Sensitive	Sensitive	Sensitive	Absent	Absent	-
2842STDY5644472	ERS367903	ERR461241	GCA_900022315	11860_7#52	6	Lees et al	Netherlands	Europe	162	Sensitive	Sensitive	Sensitive	Absent	Absent	-
2842STDY5644437	ERS367869	ERR461207	GCA_900027575	11860_7#16	6	Lees et al	Netherlands	Europe	162	Sensitive	Sensitive	Sensitive	Absent	Absent	-
2842STDY5644508	ERS367939	ERR461277	GCA_900046505	11860_7#88	6	Lees et al	Netherlands	Europe	162	Sensitive	Sensitive	Sensitive	Absent	Absent	-
2842STDY5643728	ERS367171	ERR450603	GCA_900022175	11822_8#30	6	Lees et al	Netherlands	Europe	162	Sensitive	Sensitive	Sensitive	Absent	Absent	-
2842STDY5643763	ERS367205	ERR461029	GCA_900022205	11860_5#24	6	Lees et al	Netherlands	Europe	162	Sensitive	Sensitive	Sensitive	Absent	Absent	-
4484STDY6632236	ERS1460442	ERR1947237	NA	21903_8#83	7	Lees et al	Netherlands	Europe	439	Sensitive	Sensitive	Sensitive	Absent	Absent	-
4484STDY6632257	ERS1460463	ERR1947258	NA	21903_8#104	7	Lees et al	Netherlands	Europe	439	Sensitive	Sensitive	Sensitive	Absent	Absent	-
4484STDY6808536	ERS1698465	ERR2305445	NA	22709_8#358	7	Lees et al	Netherlands	Europe	2404~	Sensitive	Sensitive	Sensitive	Absent	Absent	-
2842STDY5643843	ERS367284	ERR450607	GCA_900023305	11822_8#35	7	Lees et al	Netherlands	Europe	311	Resistant	Resistant	Sensitive	Absent	Absent	-
4484STDY6632338	ERS1460543	ERR1947336	NA	21903_8#182	7	Lees et al	Netherlands	Europe	439	Sensitive	Sensitive	Sensitive	Absent	Absent	-
4484STDY6808616	ERS1698544	ERR2305103	NA	22695_3#62	7	Lees et al	Netherlands	Europe	439	Sensitive	Sensitive	Sensitive	Absent	Absent	-
2842STDY5643683	ERS367126	ERR460955	NA	11860_4#40	7	Lees et al	Netherlands	Europe	311	Sensitive	Resistant	Sensitive	Absent	Absent	-
4484STDY6632255	ERS1460461	ERR1947256	NA	21903_8#102	7	Lees et al	Netherlands	Europe	439	Sensitive	Sensitive	Sensitive	Absent	Absent	-
2842STDY5644345	ERS367781	ERR461667	NA	11861_4#21	7	Lees et al	Netherlands	Europe	438	Sensitive	Sensitive	Sensitive	Absent	Absent	-
4484STDY6808878	ERS1698803	ERR2305267	NA	22695_3#226	7	Lees et al	Netherlands	Europe	439~	Sensitive	Sensitive	Sensitive	Absent	Absent	-
2842STDY5643680	ERS367123	ERR460952	NA	11860_4#37	7	Lees et al	Netherlands	Europe	439	Sensitive	Sensitive	Sensitive	Absent	Absent	-
2842STDY5644080	ERS367519	ERR461512	NA	11861_2#47	7	Lees et al	Netherlands	Europe	11655	Sensitive	Sensitive	Sensitive	Absent	Absent	-
4484STDY6632458	ERS1460661	ERR1947454	NA	21903_8#300	7	Lees et al	Netherlands	Europe	2404	Sensitive	Sensitive	Sensitive	Absent	Absent	-
4484STDY6632140	ERS1460347	ERR1947872	NA	21946_6#352	7	Lees et al	Netherlands	Europe	42	Sensitive	Sensitive	Sensitive	Absent	Absent	-
4484STDY6808693	ERS1698620	ERR2305179	NA	22695_3#138	7	Lees et al	Netherlands	Europe	42	Resistant	Resistant	Sensitive	Absent	Present	-
2842STDY5643959	ERS367399	ERR461401	NA	11861_1#24	7	Lees et al	Netherlands	Europe	311	Sensitive	Resistant	Sensitive	Absent	Absent	-
2842STDY5644074	ERS367513	ERR461506	GCA_900019535	11861_2#40	7	Lees et al	Netherlands	Europe	190	Sensitive	Sensitive	Sensitive	Absent	Absent	-
4484STDY6808528	ERS1698450	ERR2305437	NA	22709_8#350	7	Lees et al	Netherlands	Europe	439	Sensitive	Sensitive	Sensitive	Absent	Absent	-
4484STDY6809048	ERS1698966	ERR2305340	NA	22695_3#299	7	Lees et al	Netherlands	Europe	439	Sensitive	Sensitive	Sensitive	Absent	Absent	-
2842STDY5644681	ERS368109	ERR461809	GCA_900021375	11861_5#72	7	Lees et al	Netherlands	Europe	36	Sensitive	Sensitive	Sensitive	Absent	Absent	-
4484STDY6808623	ERS1698551	ERR2305110	NA	22695_3#69	7	Lees et al	Netherlands	Europe	439	Sensitive	Sensitive	Sensitive	Absent	Absent	-
2842STDY5643813	ERS367255	ERR461076	GCA_900044265	11860_5#73	7	Lees et al	Netherlands	Europe	439	Sensitive	Sensitive	Sensitive	Absent	Absent	-
4484STDY6809070	ERS1698993	ERR2305362	NA	22695_3#321	7	Lees et al	Netherlands	Europe	42~	Sensitive	Sensitive	Sensitive	Absent	Absent	-
2842STDY5644696	ERS368124	ERR461824	NA	11861_5#87	7	Lees et al	Netherlands	Europe	311	Sensitive	Resistant	Sensitive	Absent	Absent	-
4484STDY6808640	ERS1698568	ERR2305127	NA	22695_3#86	7	Lees et al	Netherlands	Europe	438	Sensitive	Sensitive	Sensitive	Absent	Absent	-
2842STDY5644505	ERS367936	ERR461274	NA	11860_7#85	7	Lees et al	Netherlands	Europe	33	Sensitive	Sensitive	Sensitive	Absent	Absent	-
2842STDY5643885	ERS367326	ERR461145	NA	11860_6#49	7	Lees et al	Netherlands	Europe	507	Sensitive	Resistant	Sensitive	Absent	Absent	-
2842STDY5643802	ERS367244	ERR461066	GCA_900037115	11860_5#63	7	Lees et al	Netherlands	Europe	1011	Sensitive	Sensitive	Sensitive	Absent	Absent	-
4484STDY6808639	ERS1698567	ERR2305126	NA	22695_3#85	7	Lees et al	Netherlands	Europe	37	Sensitive	Resistant	Sensitive	Absent	Absent	-
4484STDY6631949	ERS1460159	ERR1947139	NA	21903_6#169	7	Lees et al	Netherlands	Europe	42	Sensitive	Sensitive	Sensitive	Absent	Absent	-
4484STDY6808806	ERS1698732	ERR2305616	NA	23495_7#60	7	Lees et al	Netherlands	Europe	190	Sensitive	Sensitive	Sensitive	Absent	Absent	-
2842STDY5643892	ERS367333	ERR461152	NA	11860_6#56	7	Lees et al	Netherlands	Europe	36	Sensitive	Sensitive	Sensitive	Absent	Absent	-
4484STDY6808936	ERS1698861	ERR2305325	NA	22695_3#284	7	Lees et al	Netherlands	Europe	439	Sensitive	Sensitive	Sensitive	Absent	Absent	-
2842STDY5643992	ERS367432	ERR461433	NA	11861_1#58	7	Lees et al	Netherlands	Europe	507	Sensitive	Resistant	Sensitive	Absent	Absent	-
4484STDY6632232	ERS1460438	ERR1947233	NA	21903_8#79	7	Lees et al	Netherlands	Europe	42	Sensitive	Sensitive	Sensitive	Absent	Absent	-
2842STDY5753106	ERS408891	ERR554852	GCA_900042905	12673_6#21	7	Lees et al	Netherlands	Europe	42	Resistant	Resistant	Sensitive	Absent	Present	-
4484STDY6632284	ERS1460490	ERR1947284	NA	21903_8#130	7	Lees et al	Netherlands	Europe	439	Sensitive	Sensitive	Sensitive	Absent	Absent	-
4484STDY6632540	ERS1460742	ERR1947534	NA	21946_6#14	7	Lees et al	Netherlands	Europe	439	Sensitive	Sensitive	Sensitive	Absent	Absent	-
4484STDY6632001	ERS1460211	ERR1947737	NA	21946_6#217	7	Lees et al	Netherlands	Europe	439	Sensitive	Sensitive	Sensitive	Absent	Absent	-
4484STDY6809039	ERS1698957	ERR2305331	NA	22695_3#290	7	Lees et al	Netherlands	Europe	439	Sensitive	Sensitive	Sensitive	Absent	Absent	-
4484STDY6632492	ERS1460695	ERR1947488	NA	21903_8#334	7	Lees et al	Netherlands	Europe	438	Sensitive	Sensitive	Sensitive	Absent	Absent	-
4484STDY6808950	ERS1698874	ERR2305473	NA	22984_8#11	7	Lees et al	Netherlands	Europe	439	Sensitive	Sensitive	Sensitive	Absent	Absent	-
4484STDY6632630	ERS1461680	ERR1947622	NA	21946_6#102	7	Lees et al	Netherlands	Europe	42	Sensitive	Sensitive	Sensitive	Absent	Absent	-
4484STDY6809008	ERS1698932	ERR2305531	NA	22984_8#69	7	Lees et al	Netherlands	Europe	439	Sensitive	Sensitive	Sensitive	Absent	Absent	-
4484STDY6632201	ERS1460408	ERR1947203	NA	21903_8#49	7	Lees et al	Netherlands	Europe	439	Sensitive	Sensitive	Sensitive	Absent	Absent	-
2842STDY5644626	ERS368055	ERR461755	GCA_900021355	11861_5#16	7	Lees et al	Netherlands	Europe	311	Sensitive	Resistant	Sensitive	Absent	Absent	-
4484STDY6631967	ERS1460177	ERR1947703	NA	21946_6#183	7	Lees et al	Netherlands	Europe	311	Sensitive	Resistant	Sensitive	Absent	Absent	-
4484STDY6631958	ERS1460168	ERR1947148	NA	21903_6#178	7	Lees et al	Netherlands	Europe	439	Sensitive	Sensitive	Sensitive	Absent	Absent	-
4484STDY6632151	ERS1460358	ERR1947883	NA	21946_6#363	7	Lees et al	Netherlands	Europe	42~	Sensitive	Sensitive	Sensitive	Absent	Absent	-
4484STDY6808653	ERS1698580	ERR2305139	NA	22695_3#98	7	Lees et al	Netherlands	Europe	439	Sensitive	Sensitive	Sensitive	Absent	Absent	-
4484STDY6632664	ERS1461714	ERR1947656	NA	21946_6#136	7	Lees et al	Netherlands	Europe	42	Sensitive	Sensitive	Sensitive	Absent	Absent	-
4484STDY6632634	ERS1461684	ERR1947626	NA	21946_6#106	7	Lees et al	Netherlands	Europe	1965	Sensitive	Sensitive	Sensitive	Absent	Absent	-
4484STDY6632513	ERS1460716	ERR1947509	NA	21903_8#355	7	Lees et al	Netherlands	Europe	438	Sensitive	Sensitive	Sensitive	Absent	Absent	-
2842STDY5644065	ERS367504	ERR461498	GCA_900023505	11861_2#32	7	Lees et al	Netherlands	Europe	439	Sensitive	Sensitive	Sensitive	Absent	Absent	-
4484STDY6632442	ERS1460645	ERR1947438	NA	21903_8#284	7	Lees et al	Netherlands	Europe	37~	Sensitive	Resistant	Sensitive	Absent	Absent	-
4484STDY6808741	ERS1698668	ERR2305227	NA	22695_3#186	7	Lees et al	Netherlands	Europe	438	Sensitive	Sensitive	Sensitive	Absent	Absent	-
4484STDY6808797	ERS1698723	ERR2305607	NA	23495_7#51	7	Lees et al	Netherlands	Europe	438	Sensitive	Sensitive	Sensitive	Absent	Absent	-
4484STDY6632084	ERS1460293	ERR1947818	NA	21946_6#298	7	Lees et al	Netherlands	Europe	439	Sensitive	Sensitive	Sensitive	Absent	Absent	-
2842STDY5644364	ERS367800	ERR461686	NA	11861_4#41	7	Lees et al	Netherlands	Europe	13181	Sensitive	Sensitive	Sensitive	Absent	Absent	-
4484STDY6632122	ERS1460330	ERR1947855	NA	21946_6#335	7	Lees et al	Netherlands	Europe	36	Sensitive	Sensitive	Sensitive	Absent	Absent	-
4484STDY6632339	ERS1460544	ERR1947337	NA	21903_8#183	7	Lees et al	Netherlands	Europe	439	Sensitive	Sensitive	Sensitive	Absent	Absent	-
4484STDY6808721	ERS1698648	ERR2305207	NA	22695_3#166	7	Lees et al	Netherlands	Europe	439	Sensitive	Sensitive	Sensitive	Absent	Absent	-
4484STDY6632673	ERS1461723	ERR1947665	NA	21946_6#145	7	Lees et al	Netherlands	Europe	439	Sensitive	Sensitive	Sensitive	Absent	Absent	-
4484STDY6809075	ERS1698998	ERR2305367	NA	22695_3#326	7	Lees et al	Netherlands	Europe	42	Sensitive	Sensitive	Sensitive	Absent	Absent	-
2842STDY5643772	ERS367214	ERR461037	GCA_900020045	11860_5#33	7	Lees et al	Netherlands	Europe	36	Sensitive	Sensitive	Sensitive	Absent	Absent	-
2842STDY5643912	ERS367353	ERR461171	NA	11860_6#75	7	Lees et al	Netherlands	Europe	9579	Sensitive	Sensitive	Sensitive	Absent	Absent	-
2842STDY5644046	ERS367485	ERR461479	GCA_900018505	11861_2#12	7	Lees et al	Netherlands	Europe	439	Sensitive	Sensitive	Sensitive	Absent	Absent	-
4484STDY6632218	ERS1460425	ERR1947220	NA	21903_8#66	7	Lees et al	Netherlands	Europe	439	Sensitive	Sensitive	Sensitive	Absent	Absent	-
4484STDY6632460	ERS1460663	ERR1947456	NA	21903_8#302	7	Lees et al	Netherlands	Europe	9579	Sensitive	Sensitive	Sensitive	Absent	Absent	-
4484STDY6631968	ERS1460178	ERR1947704	NA	21946_6#184	7	Lees et al	Netherlands	Europe	439	Sensitive	Sensitive	Sensitive	Absent	Absent	-
2842STDY5644698	ERS368126	ERR461826	NA	11861_5#89	7	Lees et al	Netherlands	Europe	36	Sensitive	Sensitive	Sensitive	Absent	Absent	-
2842STDY5753129	ERS408914	ERR554875	GCA_900024075	12673_6#44	7	Lees et al	Netherlands	Europe	439	Sensitive	Sensitive	Sensitive	Absent	Absent	-
4484STDY6808978	ERS1698902	ERR2305501	NA	22984_8#39	7	Lees et al	Netherlands	Europe	439	Sensitive	Sensitive	Sensitive	Absent	Absent	-
4484STDY6808689	ERS1698616	ERR2305175	NA	22695_3#134	7	Lees et al	Netherlands	Europe	438	Sensitive	Sensitive	Sensitive	Absent	Absent	-
2842STDY5643685	ERS367128	ERR460957	GCA_900026435	11860_4#42	7	Lees et al	Netherlands	Europe	37	Sensitive	Resistant	Sensitive	Absent	Absent	-
2842STDY5644611	ERS368040	ERR461378	GCA_900039995	11860_8#96	7	Lees et al	Netherlands	Europe	36	Sensitive	Sensitive	Sensitive	Absent	Absent	-
4484STDY6632362	ERS1460567	ERR1947360	NA	21903_8#206	7	Lees et al	Netherlands	Europe	439	Sensitive	Sensitive	Sensitive	Absent	Absent	-
4484STDY6632260	ERS1460466	ERR1947261	NA	21903_8#107	7	Lees et al	Netherlands	Europe	439	Sensitive	Sensitive	Sensitive	Absent	Absent	-
4484STDY6631950	ERS1460160	ERR1947140	NA	21903_6#170	7	Lees et al	Netherlands	Europe	42	Resistant	Resistant	Sensitive	Absent	Present	-
4484STDY6632621	ERS1461671	ERR1947613	NA	21946_6#93	7	Lees et al	Netherlands	Europe	439	Sensitive	Sensitive	Sensitive	Absent	Absent	-
2842STDY5644034	ERS367473	ERR461468	NA	11861_1#95	7	Lees et al	Netherlands	Europe	778	Sensitive	Sensitive	Sensitive	Absent	Absent	-
2842STDY5644422	ERS367855	ERR461193	NA	11860_7#1	7	Lees et al	Netherlands	Europe	507	Resistant	Resistant	Sensitive	Absent	Absent	-
4484STDY6808923	ERS1698848	ERR2305312	NA	22695_3#271	7	Lees et al	Netherlands	Europe	439	Sensitive	Sensitive	Sensitive	Absent	Absent	-
4484STDY6808930	ERS1698855	ERR2305319	NA	22695_3#278	7	Lees et al	Netherlands	Europe	439	Sensitive	Sensitive	Sensitive	Absent	Absent	-
4484STDY6632494	ERS1460697	ERR1947490	NA	21903_8#336	7	Lees et al	Netherlands	Europe	42~	Sensitive	Sensitive	Sensitive	Absent	Absent	-
4484STDY6808569	ERS1698497	ERR2305056	NA	22695_3#15	7	Lees et al	Netherlands	Europe	2404	Sensitive	Sensitive	Sensitive	Absent	Absent	-
4484STDY6808846	ERS1698771	ERR2305235	NA	22695_3#194	7	Lees et al	Netherlands	Europe	439	Sensitive	Sensitive	Sensitive	Absent	Absent	-
4484STDY6808819	ERS1698745	ERR2305628	NA	23495_7#72	7	Lees et al	Netherlands	Europe	439	Sensitive	Sensitive	Sensitive	Absent	Absent	-
2842STDY5644257	ERS367694	ERR461581	GCA_900019595	11861_3#28	7	Lees et al	Netherlands	Europe	11655	Sensitive	Sensitive	Sensitive	Absent	Absent	-
4484STDY6632469	ERS1460672	ERR1947465	NA	21903_8#311	7	Lees et al	Netherlands	Europe	11655~	Sensitive	Sensitive	Sensitive	Absent	Absent	-
4484STDY6808573	ERS1698501	ERR2305060	NA	22695_3#19	7	Lees et al	Netherlands	Europe	190	Sensitive	Sensitive	Sensitive	Absent	Absent	-
2842STDY5644359	ERS367795	ERR461681	NA	11861_4#36	7	Lees et al	Netherlands	Europe	36	Sensitive	Sensitive	Sensitive	Absent	Absent	-
2842STDY5643706	ERS367149	ERR460978	NA	11860_4#64	7	Lees et al	Netherlands	Europe	1965	Sensitive	Sensitive	Sensitive	Absent	Absent	-
4484STDY6808476	ERS1698405	ERR2305385	NA	22709_8#298	7	Lees et al	Netherlands	Europe	438	Sensitive	Sensitive	Sensitive	Absent	Absent	-
4484STDY6808747	ERS1698673	ERR2305557	NA	23495_7#1	7	Lees et al	Netherlands	Europe	439	Sensitive	Sensitive	Sensitive	Absent	Absent	-
2842STDY5644596	ERS368026	ERR461364	GCA_900027105	11860_8#82	7	Lees et al	Netherlands	Europe	36~	Sensitive	Sensitive	Sensitive	Absent	Absent	-
2842STDY5643867	ERS367308	ERR461127	GCA_900024545	11860_6#29	7	Lees et al	Netherlands	Europe	36	Sensitive	Sensitive	Sensitive	Absent	Absent	-
2842STDY5644158	ERS367596	ERR461853	GCA_900020735	11893_1#27	7	Lees et al	Netherlands	Europe	438	Sensitive	Sensitive	Sensitive	Absent	Absent	-
4484STDY6632658	ERS1461708	ERR1947650	NA	21946_6#130	7	Lees et al	Netherlands	Europe	439	Sensitive	Sensitive	Sensitive	Absent	Absent	-
4484STDY6808762	ERS1698688	ERR2305572	NA	23495_7#16	7	Lees et al	Netherlands	Europe	439	Sensitive	Sensitive	Sensitive	Absent	Absent	-
4484STDY6808794	ERS1698720	ERR2305604	NA	23495_7#48	7	Lees et al	Netherlands	Europe	439	Sensitive	Sensitive	Sensitive	Absent	Absent	-
2842STDY5643947	ERS367387	ERR461390	GCA_900032805	11861_1#13	7	Lees et al	Netherlands	Europe	36	Sensitive	Sensitive	Sensitive	Absent	Absent	-
4484STDY6808576	ERS1698504	ERR2305063	NA	22695_3#22	7	Lees et al	Netherlands	Europe	11655	Sensitive	Sensitive	Sensitive	Absent	Absent	-
4484STDY6632235	ERS1460441	ERR1947236	NA	21903_8#82	7	Lees et al	Netherlands	Europe	439	Sensitive	Sensitive	Sensitive	Absent	Absent	-
2842STDY5643966	ERS367406	ERR461408	GCA_900028175	11861_1#32	7	Lees et al	Netherlands	Europe	36	Sensitive	Sensitive	Sensitive	Present	Absent	-
2842STDY5643849	ERS367290	ERR461110	GCA_900026465	11860_6#12	7	Lees et al	Netherlands	Europe	13181	Sensitive	Sensitive	Sensitive	Absent	Absent	-
4484STDY6808713	ERS1698640	ERR2305199	NA	22695_3#158	7	Lees et al	Netherlands	Europe	438	Sensitive	Sensitive	Sensitive	Absent	Absent	-
2842STDY5643792	ERS367234	ERR461056	NA	11860_5#53	7	Lees et al	Netherlands	Europe	439	Sensitive	Sensitive	Sensitive	Absent	Absent	-
4484STDY6808805	ERS1698731	ERR2305615	NA	23495_7#59	7	Lees et al	Netherlands	Europe	42	Sensitive	Sensitive	Sensitive	Absent	Absent	-
2842STDY5643649	ERS367092	ERR460921	GCA_900028155	11860_4#4	7	Lees et al	Netherlands	Europe	439	Sensitive	Sensitive	Sensitive	Absent	Absent	-
4484STDY6808845	ERS1698770	ERR2305234	NA	22695_3#193	7	Lees et al	Netherlands	Europe	439	Sensitive	Sensitive	Sensitive	Absent	Absent	-
2842STDY5644610	ERS368039	ERR461377	GCA_900021335	11860_8#95	7	Lees et al	Netherlands	Europe	439	Sensitive	Sensitive	Sensitive	Absent	Absent	-
4484STDY6808501	ERS1698430	ERR2305410	NA	22709_8#323	7	Lees et al	Netherlands	Europe	439	Sensitive	Sensitive	Sensitive	Absent	Absent	-
4484STDY6808862	ERS1698787	ERR2305251	NA	22695_3#210	7	Lees et al	Netherlands	Europe	439	Sensitive	Sensitive	Sensitive	Absent	Absent	-
4484STDY6632353	ERS1460558	ERR1947351	NA	21903_8#197	7	Lees et al	Netherlands	Europe	439	Sensitive	Sensitive	Sensitive	Absent	Absent	-
2842STDY5643899	ERS367340	ERR461158	NA	11860_6#62	7	Lees et al	Netherlands	Europe	190	Sensitive	Sensitive	Sensitive	Absent	Absent	-
4484STDY6808468	ERS1698397	ERR2305377	NA	22709_8#290	7	Lees et al	Netherlands	Europe	439	Sensitive	Sensitive	Sensitive	Absent	Absent	-
4484STDY6632684	ERS1461733	ERR1947674	NA	21946_6#154	7	Lees et al	Netherlands	Europe	42	Sensitive	Sensitive	Sensitive	Absent	Absent	-
4484STDY6808825	ERS1698751	ERR2305634	NA	23495_7#78	7	Lees et al	Netherlands	Europe	439	Sensitive	Sensitive	Sensitive	Absent	Absent	-
4484STDY6632473	ERS1460676	ERR1947469	NA	21903_8#315	7	Lees et al	Netherlands	Europe	439	Sensitive	Sensitive	Sensitive	Absent	Absent	-
4484STDY6808913	ERS1698838	ERR2305302	NA	22695_3#261	7	Lees et al	Netherlands	Europe	438	Sensitive	Sensitive	Sensitive	Absent	Absent	-
2842STDY5644635	ERS368064	ERR461764	NA	11861_5#25	7	Lees et al	Netherlands	Europe	439	Sensitive	Sensitive	Sensitive	Absent	Absent	-
4484STDY6632115	ERS1460324	ERR1947849	NA	21946_6#329	7	Lees et al	Netherlands	Europe	439	Sensitive	Sensitive	Sensitive	Absent	Absent	-
4484STDY6632517	ERS1460720	ERR1947513	NA	21903_8#359	7	Lees et al	Netherlands	Europe	438	Sensitive	Sensitive	Sensitive	Absent	Absent	-
4484STDY6808929	ERS1698854	ERR2305318	NA	22695_3#277	7	Lees et al	Netherlands	Europe	11655	Sensitive	Sensitive	Sensitive	Absent	Absent	-
4484STDY6808969	ERS1698893	ERR2305492	NA	22984_8#30	7	Lees et al	Netherlands	Europe	439	Sensitive	Sensitive	Sensitive	Absent	Absent	-
2842STDY5644150	ERS367588	ERR461845	GCA_900022785	11893_1#19	7	Lees et al	Netherlands	Europe	439	Sensitive	Sensitive	Sensitive	Absent	Absent	-
4484STDY6808817	ERS1698743	ERR2305626	NA	23495_7#70	7	Lees et al	Netherlands	Europe	439	Sensitive	Sensitive	Sensitive	Absent	Absent	-
4484STDY6632256	ERS1460462	ERR1947257	NA	21903_8#103	7	Lees et al	Netherlands	Europe	439	Sensitive	Sensitive	Sensitive	Absent	Absent	-
4484STDY6632243	ERS1460449	ERR1947244	NA	21903_8#90	7	Lees et al	Netherlands	Europe	439	Sensitive	Sensitive	Sensitive	Absent	Absent	-
4484STDY6808465	ERS1698394	ERR2305374	NA	22709_8#287	7	Lees et al	Netherlands	Europe	11655	Sensitive	Sensitive	Sensitive	Absent	Absent	-
4484STDY6632670	ERS1461720	ERR1947662	NA	21946_6#142	7	Lees et al	Netherlands	Europe	439	Sensitive	Sensitive	Sensitive	Absent	Absent	-
4484STDY6808870	ERS1698795	ERR2305259	NA	22695_3#218	7	Lees et al	Netherlands	Europe	439	Sensitive	Sensitive	Sensitive	Absent	Absent	-
4484STDY6632500	ERS1460703	ERR1947496	NA	21903_8#342	7	Lees et al	Netherlands	Europe	439	Sensitive	Sensitive	Sensitive	Absent	Absent	-
4484STDY6809049	ERS1698967	ERR2305341	NA	22695_3#300	7	Lees et al	Netherlands	Europe	42	Sensitive	Sensitive	Sensitive	Absent	Present	-
4484STDY6808873	ERS1698798	ERR2305262	NA	22695_3#221	7	Lees et al	Netherlands	Europe	439	Sensitive	Sensitive	Sensitive	Absent	Absent	-
4484STDY6808832	ERS1698758	ERR2305641	NA	23495_7#85	7	Lees et al	Netherlands	Europe	439	Sensitive	Sensitive	Sensitive	Absent	Absent	-
4484STDY6632627	ERS1461677	ERR1947619	NA	21946_6#99	7	Lees et al	Netherlands	Europe	355	Sensitive	Sensitive	Sensitive	Absent	Absent	-
4484STDY6809016	ERS1698940	ERR2305539	NA	22984_8#77	7	Lees et al	Netherlands	Europe	42	Sensitive	Sensitive	Sensitive	Absent	Absent	-
4484STDY6808730	ERS1698657	ERR2305216	NA	22695_3#175	7	Lees et al	Netherlands	Europe	439	Sensitive	Sensitive	Sensitive	Absent	Absent	-
2842STDY5644213	ERS367651	ERR461903	NA	11893_1#80	7	Lees et al	Netherlands	Europe	42	Sensitive	Sensitive	Sensitive	Absent	Absent	-
4484STDY6808874	ERS1698799	ERR2305263	NA	22695_3#222	7	Lees et al	Netherlands	Europe	439	Sensitive	Sensitive	Sensitive	Absent	Absent	-
4484STDY6632514	ERS1460717	ERR1947510	NA	21903_8#356	7	Lees et al	Netherlands	Europe	439	Sensitive	Sensitive	Sensitive	Absent	Absent	-
4484STDY6631947	ERS1460157	ERR1947137	NA	21903_6#167	7	Lees et al	Netherlands	Europe	439	Sensitive	Sensitive	Sensitive	Absent	Absent	-
2842STDY5643895	ERS367336	ERR461154	GCA_900029405	11860_6#58	7	Lees et al	Netherlands	Europe	36	Sensitive	Sensitive	Sensitive	Absent	Absent	-
4484STDY6632539	ERS1460741	ERR1947533	NA	21946_6#13	7	Lees et al	Netherlands	Europe	42	Sensitive	Sensitive	Sensitive	Absent	Absent	-
4484STDY6632679	ERS1461729	ERR1947670	NA	21946_6#150	7	Lees et al	Netherlands	Europe	42	Sensitive	Sensitive	Sensitive	Absent	Absent	-
4484STDY6808840	ERS1698766	ERR2305649	NA	23495_7#93	7	Lees et al	Netherlands	Europe	9579	Sensitive	Sensitive	Sensitive	Absent	Absent	-
4484STDY6632527	ERS1460729	ERR1947521	NA	21946_6#1	7	Lees et al	Netherlands	Europe	9579	Sensitive	Sensitive	Sensitive	Absent	Absent	-
2842STDY5644507	ERS367938	ERR461276	GCA_900022735	11860_7#87	7	Lees et al	Netherlands	Europe	439	Sensitive	Sensitive	Sensitive	Absent	Absent	-
4484STDY6808710	ERS1698637	ERR2305196	NA	22695_3#155	7	Lees et al	Netherlands	Europe	439	Sensitive	Sensitive	Sensitive	Absent	Absent	-
4484STDY6632553	ERS1460755	ERR1947547	NA	21946_6#27	7	Lees et al	Netherlands	Europe	438	Sensitive	Sensitive	Sensitive	Absent	Absent	-
4484STDY6632091	ERS1460300	ERR1947825	NA	21946_6#305	7	Lees et al	Netherlands	Europe	439	Sensitive	Sensitive	Sensitive	Absent	Absent	-
4484STDY6632394	ERS1460599	ERR1947392	NA	21903_8#238	7	Lees et al	Netherlands	Europe	36	Sensitive	Sensitive	Sensitive	Absent	Absent	-
4484STDY6808925	ERS1698850	ERR2305314	NA	22695_3#273	7	Lees et al	Netherlands	Europe	439	Sensitive	Sensitive	Sensitive	Absent	Absent	-
4484STDY6808830	ERS1698756	ERR2305639	NA	23495_7#83	7	Lees et al	Netherlands	Europe	439	Sensitive	Sensitive	Sensitive	Absent	Absent	-
2842STDY5644091	ERS367530	ERR461523	GCA_900023555	11861_2#58	7	Lees et al	Netherlands	Europe	439	Sensitive	Sensitive	Sensitive	Absent	Absent	-
4484STDY6808892	ERS1698817	ERR2305281	NA	22695_3#240	7	Lees et al	Netherlands	Europe	439	Sensitive	Sensitive	Sensitive	Absent	Absent	-
2842STDY5644341	ERS367777	ERR461663	NA	11861_4#17	7	Lees et al	Netherlands	Europe	42	Resistant	Resistant	Sensitive	Absent	Present	-
4484STDY6809002	ERS1698926	ERR2305525	NA	22984_8#63	7	Lees et al	Netherlands	Europe	42~	Sensitive	Sensitive	Sensitive	Absent	Absent	-
2842STDY5644119	ERS367558	ERR461550	NA	11861_2#85	7	Lees et al	Netherlands	Europe	439	Sensitive	Sensitive	Sensitive	Absent	Absent	-
4484STDY6809007	ERS1698931	ERR2305530	NA	22984_8#68	7	Lees et al	Netherlands	Europe	439	Sensitive	Sensitive	Sensitive	Absent	Absent	-
2842STDY5643765	ERS367207	ERR461031	NA	11860_5#26	7	Lees et al	Netherlands	Europe	507	Sensitive	Resistant	Sensitive	Absent	Absent	-
4484STDY6632430	ERS1460633	ERR1947426	NA	21903_8#272	7	Lees et al	Netherlands	Europe	190	Sensitive	Sensitive	Sensitive	Absent	Absent	-
4484STDY6632543	ERS1460745	ERR1947537	NA	21946_6#17	7	Lees et al	Netherlands	Europe	439	Sensitive	Sensitive	Sensitive	Absent	Absent	-
4484STDY6808908	ERS1698833	ERR2305297	NA	22695_3#256	7	Lees et al	Netherlands	Europe	439	Sensitive	Sensitive	Sensitive	Absent	Absent	-
2842STDY5644641	ERS368070	ERR461770	NA	11861_5#32	7	Lees et al	Netherlands	Europe	36	Sensitive	Sensitive	Sensitive	Absent	Absent	-
4484STDY6808680	ERS1698607	ERR2305166	NA	22695_3#125	7	Lees et al	Netherlands	Europe	438	Sensitive	Sensitive	Sensitive	Absent	Absent	-
4484STDY6808499	ERS1698428	ERR2305408	NA	22709_8#321	7	Lees et al	Netherlands	Europe	8866	Sensitive	Sensitive	Sensitive	Absent	Absent	-
2842STDY5643650	ERS367093	ERR460922	GCA_900037425	11860_4#5	7	Lees et al	Netherlands	Europe	36	Sensitive	Sensitive	Sensitive	Absent	Absent	-
4484STDY6632367	ERS1460572	ERR1947365	NA	21903_8#211	7	Lees et al	Netherlands	Europe	439	Sensitive	Sensitive	Sensitive	Absent	Absent	-
4484STDY6631962	ERS1460172	ERR1947152	NA	21903_6#182	7	Lees et al	Netherlands	Europe	438	Sensitive	Sensitive	Sensitive	Absent	Absent	-
2842STDY5644443	ERS367875	ERR461213	GCA_900018545	11860_7#22	7	Lees et al	Netherlands	Europe	42	Sensitive	Sensitive	Sensitive	Absent	Absent	-
4484STDY6632551	ERS1460753	ERR1947545	NA	21946_6#25	7	Lees et al	Netherlands	Europe	439	Sensitive	Sensitive	Sensitive	Absent	Absent	-
2842STDY5644452	ERS367884	ERR461222	NA	11860_7#32	7	Lees et al	Netherlands	Europe	507	Sensitive	Resistant	Sensitive	Absent	Absent	-
2842STDY5643717	ERS367160	ERR460988	GCA_900027125	11860_4#75	7	Lees et al	Netherlands	Europe	1011	Sensitive	Sensitive	Sensitive	Absent	Absent	-
4484STDY6632459	ERS1460662	ERR1947455	NA	21903_8#301	7	Lees et al	Netherlands	Europe	9579	Sensitive	Sensitive	Sensitive	Absent	Absent	-
4484STDY6808963	ERS1698887	ERR2305486	NA	22984_8#24	7	Lees et al	Netherlands	Europe	42	Sensitive	Sensitive	Sensitive	Absent	Absent	-
2842STDY5881942	ERS515209	ERR716236	GCA_900025965	14412_3#59	7	Lees et al	Netherlands	Europe	1965~	Sensitive	Sensitive	Sensitive	Absent	Absent	-
4484STDY6632085	ERS1460294	ERR1947819	NA	21946_6#299	7	Lees et al	Netherlands	Europe	439	Sensitive	Sensitive	Sensitive	Absent	Absent	-
4484STDY6808847	ERS1698772	ERR2305236	NA	22695_3#195	7	Lees et al	Netherlands	Europe	439	Sensitive	Sensitive	Sensitive	Absent	Absent	-
4484STDY6808977	ERS1698901	ERR2305500	NA	22984_8#38	7	Lees et al	Netherlands	Europe	439	Sensitive	Sensitive	Sensitive	Absent	Absent	-
2842STDY5644335	ERS367771	ERR461657	NA	11861_4#11	7	Lees et al	Netherlands	Europe	42	Resistant	Resistant	Sensitive	Absent	Absent	-
2842STDY5644235	ERS367672	ERR461559	GCA_900029435	11861_3#5	7	Lees et al	Netherlands	Europe	9579	Sensitive	Sensitive	Sensitive	Absent	Absent	-
2842STDY5644141	ERS367579	ERR461838	GCA_900047035	11893_1#11	7	Lees et al	Netherlands	Europe	36	Sensitive	Sensitive	Sensitive	Absent	Absent	-
2842STDY5644067	ERS367506	ERR461500	GCA_900017015	11861_2#34	7	Lees et al	Netherlands	Europe	4767	Sensitive	Sensitive	Sensitive	Absent	Absent	-
2842STDY5644085	ERS367524	ERR461517	GCA_900022545	11861_2#52	7	Lees et al	Netherlands	Europe	42	Sensitive	Sensitive	Sensitive	Absent	Absent	-
4484STDY6808654	ERS1698581	ERR2305140	NA	22695_3#99	7	Lees et al	Netherlands	Europe	439	Sensitive	Sensitive	Sensitive	Absent	Absent	-
4484STDY6808947	ERS1698871	ERR2305470	NA	22984_8#8	7	Lees et al	Netherlands	Europe	439	Sensitive	Sensitive	Sensitive	Absent	Absent	-
2842STDY5644575	ERS368005	ERR461343	NA	11860_8#61	7	Lees et al	Netherlands	Europe	36	Sensitive	Sensitive	Sensitive	Absent	Absent	-
2842STDY5643816	ERS367258	ERR461079	NA	11860_5#76	7	Lees et al	Netherlands	Europe	507	Sensitive	Resistant	Sensitive	Absent	Absent	-
4484STDY6808801	ERS1698727	ERR2305611	NA	23495_7#55	7	Lees et al	Netherlands	Europe	42	Sensitive	Sensitive	Sensitive	Absent	Absent	-
2842STDY5644220	ERS367658	ERR461910	NA	11893_1#87	7	Lees et al	Netherlands	Europe	438	Sensitive	Sensitive	Sensitive	Absent	Absent	-
4484STDY6632538	ERS1460740	ERR1947532	NA	21946_6#12	7	Lees et al	Netherlands	Europe	42	Sensitive	Sensitive	Sensitive	Absent	Absent	-
4484STDY6632383	ERS1460588	ERR1947381	NA	21903_8#227	7	Lees et al	Netherlands	Europe	439	Sensitive	Sensitive	Sensitive	Absent	Absent	-
4484STDY6808820	ERS1698746	ERR2305629	NA	23495_7#73	7	Lees et al	Netherlands	Europe	439	Sensitive	Sensitive	Sensitive	Absent	Absent	-
4484STDY6632695	ERS1461744	ERR1947685	NA	21946_6#165	7	Lees et al	Netherlands	Europe	311	Sensitive	Resistant	Sensitive	Absent	Absent	-
2842STDY5643771	ERS367213	ERR461036	GCA_900021455	11860_5#32	7	Lees et al	Netherlands	Europe	438	Sensitive	Sensitive	Sensitive	Absent	Absent	-
2842STDY5753132	ERS408917	ERR554878	GCA_900031155	12673_6#47	7	Lees et al	Netherlands	Europe	439	Sensitive	Sensitive	Sensitive	Absent	Absent	-
2842STDY5643791	ERS367233	ERR461055	GCA_900034345	11860_5#52	7	Lees et al	Netherlands	Europe	439	Sensitive	Sensitive	Sensitive	Absent	Absent	-
4484STDY6632590	ERS1460792	ERR1947584	NA	21946_6#64	7	Lees et al	Netherlands	Europe	42	Sensitive	Sensitive	Sensitive	Absent	Absent	-
2842STDY5643744	ERS367186	ERR461010	GCA_900031105	11860_5#4	7	Lees et al	Netherlands	Europe	311	Sensitive	Resistant	Sensitive	Absent	Absent	-
2842STDY5644260	ERS367697	ERR461584	GCA_900030025	11861_3#32	7	Lees et al	Netherlands	Europe	42	Sensitive	Sensitive	Sensitive	Absent	Absent	-
2842STDY5643835	ERS367277	ERR461098	NA	11860_5#95	7	Lees et al	Netherlands	Europe	311	Sensitive	Resistant	Sensitive	Absent	Absent	-
2842STDY5644216	ERS367654	ERR461906	NA	11893_1#83	8	Lees et al	Netherlands	Europe	289	Sensitive	Resistant	Sensitive	Absent	Present	-
2842STDY5644114	ERS367553	ERR461545	GCA_900025845	11861_2#80	8	Lees et al	Netherlands	Europe	289	Sensitive	Resistant	Sensitive	Absent	Absent	-
2842STDY5753131	ERS408916	ERR554877	NA	12673_6#46	8	Lees et al	Netherlands	Europe	289	Sensitive	Resistant	Sensitive	Absent	Absent	-
4484STDY6808563	ERS1698491	ERR2305050	NA	22695_3#9	8	Lees et al	Netherlands	Europe	289	Sensitive	Resistant	Sensitive	Absent	Absent	-
4484STDY6632228	ERS1460435	ERR1947230	NA	21903_8#76	9	Lees et al	Netherlands	Europe	63	Sensitive	Sensitive	Resistant	Absent	Present	-
2842STDY5644184	ERS367622	ERR461878	NA	11893_1#54	10	Lees et al	Netherlands	Europe	2013	Resistant	Resistant	Resistant	Absent	Present	-
2842STDY5753138	ERS408923	ERR554884	GCA_900032855	12673_6#53	10	Lees et al	Netherlands	Europe	230	Sensitive	Resistant	Resistant	Absent	Absent	-
4484STDY6808816	ERS1698742	ERR2305625	NA	23495_7#69	10	Lees et al	Netherlands	Europe	276	Sensitive	Resistant	Resistant	Absent	Present	-
4484STDY6808996	ERS1698920	ERR2305519	NA	22984_8#57	10	Lees et al	Netherlands	Europe	230~	Resistant	Resistant	Intermediate	Absent	Present	-
4484STDY6808731	ERS1698658	ERR2305217	NA	22695_3#176	10	Lees et al	Netherlands	Europe	2355~	Sensitive	Sensitive	Intermediate	Absent	Present	-
2842STDY5644060	ERS367499	ERR461493	NA	11861_2#26	10	Lees et al	Netherlands	Europe	230	Sensitive	Resistant	Resistant	Absent	Absent	-
4484STDY6632450	ERS1460653	ERR1947446	NA	21903_8#292	10	Lees et al	Netherlands	Europe	230	Sensitive	Resistant	Resistant	Absent	Absent	-
4484STDY6808973	ERS1698897	ERR2305496	NA	22984_8#34	10	Lees et al	Netherlands	Europe	230	Sensitive	Resistant	Resistant	Absent	Absent	-
4484STDY6808995	ERS1698919	ERR2305518	NA	22984_8#56	10	Lees et al	Netherlands	Europe	230~	Resistant	Resistant	Intermediate	Absent	Present	-
2842STDY5644355	ERS367791	ERR461677	GCA_900034375	11861_4#32	10	Lees et al	Netherlands	Europe	230	Sensitive	Resistant	Resistant	Absent	Absent	-
4484STDY6808690	ERS1698617	ERR2305176	NA	22695_3#135	10	Lees et al	Netherlands	Europe	230~	Resistant	Resistant	Intermediate	Absent	Present	-
4484STDY6808742	ERS1698669	ERR2305228	NA	22695_3#187	10	Lees et al	Netherlands	Europe	2355~	Sensitive	Sensitive	Intermediate	Absent	Present	-
2842STDY5644039	ERS367478	ERR461472	NA	11861_2#4	10	Lees et al	Netherlands	Europe	11100	Sensitive	Sensitive	Intermediate	Absent	Absent	-
4484STDY6808559	ERS1698487	ERR2305046	NA	22695_3#5	11	Lees et al	Netherlands	Europe	193	Sensitive	Sensitive	Sensitive	Absent	Absent	-
4484STDY6632444	ERS1460647	ERR1947440	NA	21903_8#286	11	Lees et al	Netherlands	Europe	1262	Sensitive	Resistant	Sensitive	Absent	Absent	-
4484STDY6632124	ERS1460332	ERR1947857	NA	21946_6#337	11	Lees et al	Netherlands	Europe	1262	Sensitive	Resistant	Sensitive	Absent	Absent	-
4484STDY6632153	ERS1460360	ERR1947155	NA	21903_8#1	11	Lees et al	Netherlands	Europe	1262	Sensitive	Resistant	Sensitive	Absent	Absent	-
4484STDY6632638	ERS1461688	ERR1947630	NA	21946_6#110	11	Lees et al	Netherlands	Europe	193	Sensitive	Sensitive	Sensitive	Absent	Absent	-
4484STDY6808894	ERS1698819	ERR2305283	NA	22695_3#242	11	Lees et al	Netherlands	Europe	1262	Sensitive	Resistant	Sensitive	Absent	Absent	-
4484STDY6809038	ERS1698956	ERR2305330	NA	22695_3#289	11	Lees et al	Netherlands	Europe	193	Sensitive	Sensitive	Sensitive	Absent	Absent	-
4484STDY6632552	ERS1460754	ERR1947546	NA	21946_6#26	11	Lees et al	Netherlands	Europe	193	Sensitive	Sensitive	Sensitive	Absent	Absent	-
4484STDY6808985	ERS1698909	ERR2305508	NA	22984_8#46	11	Lees et al	Netherlands	Europe	1262	Sensitive	Resistant	Sensitive	Absent	Absent	-
4484STDY6808665	ERS1698592	ERR2305151	NA	22695_3#110	11	Lees et al	Netherlands	Europe	1262	Sensitive	Resistant	Sensitive	Absent	Absent	-
4484STDY6808606	ERS1698534	ERR2305093	NA	22695_3#52	11	Lees et al	Netherlands	Europe	1533	Sensitive	Sensitive	Sensitive	Absent	Absent	-
4484STDY6632559	ERS1460761	ERR1947553	NA	21946_6#33	11	Lees et al	Netherlands	Europe	1262	Sensitive	Resistant	Sensitive	Absent	Absent	-
4484STDY6808809	ERS1698735	ERR2305619	NA	23495_7#63	11	Lees et al	Netherlands	Europe	193	Sensitive	Sensitive	Sensitive	Absent	Present	-
4484STDY6808956	ERS1698880	ERR2305479	NA	22984_8#17	11	Lees et al	Netherlands	Europe	13423	Sensitive	Sensitive	Intermediate	Absent	Absent	-
4484STDY6808993	ERS1698917	ERR2305516	NA	22984_8#54	11	Lees et al	Netherlands	Europe	1877	Sensitive	Sensitive	Sensitive	Absent	Absent	-
4484STDY6808910	ERS1698835	ERR2305299	NA	22695_3#258	11	Lees et al	Netherlands	Europe	1262	Sensitive	Resistant	Sensitive	Absent	Absent	-
4484STDY6632483	ERS1460686	ERR1947479	NA	21903_8#325	11	Lees et al	Netherlands	Europe	1533	Sensitive	Sensitive	Sensitive	Absent	Present	-
4484STDY6808786	ERS1698712	ERR2305596	NA	23495_7#40	11	Lees et al	Netherlands	Europe	193	Sensitive	Sensitive	Sensitive	Absent	Absent	-
4484STDY6809055	ERS1698978	ERR2305347	NA	22695_3#306	11	Lees et al	Netherlands	Europe	1262	Sensitive	Resistant	Sensitive	Absent	Absent	-
4484STDY6808676	ERS1698603	ERR2305162	NA	22695_3#121	11	Lees et al	Netherlands	Europe	193	Sensitive	Sensitive	Sensitive	Absent	Absent	-
4484STDY6632246	ERS1460452	ERR1947247	NA	21903_8#93	11	Lees et al	Netherlands	Europe	1262	Sensitive	Resistant	Sensitive	Absent	Absent	-
2842STDY5643956	ERS367396	ERR461398	GCA_900023435	11861_1#21	11	Lees et al	Netherlands	Europe	1262	Sensitive	Resistant	Sensitive	Absent	Absent	-
4484STDY6808968	ERS1698892	ERR2305491	NA	22984_8#29	11	Lees et al	Netherlands	Europe	1877	Sensitive	Sensitive	Sensitive	Absent	Absent	-
4484STDY6808785	ERS1698711	ERR2305595	NA	23495_7#39	11	Lees et al	Netherlands	Europe	193	Sensitive	Sensitive	Sensitive	Absent	Absent	-
4484STDY6808990	ERS1698914	ERR2305513	NA	22984_8#51	11	Lees et al	Netherlands	Europe	8711	Sensitive	Resistant	Sensitive	Absent	Absent	-
4484STDY6632336	ERS1460541	ERR1947334	NA	21903_8#180	11	Lees et al	Netherlands	Europe	1262	Sensitive	Resistant	Sensitive	Absent	Absent	-
2842STDY5644375	ERS367811	ERR461697	GCA_900044675	11861_4#53	11	Lees et al	Netherlands	Europe	193	Sensitive	Sensitive	Sensitive	Absent	Present	-
2842STDY5643991	ERS367431	ERR461432	NA	11861_1#57	11	Lees et al	Netherlands	Europe	1262	Sensitive	Resistant	Sensitive	Absent	Absent	-
4484STDY6632571	ERS1460773	ERR1947565	NA	21946_6#45	11	Lees et al	Netherlands	Europe	193	Sensitive	Sensitive	Sensitive	Absent	Absent	-
4484STDY6808790	ERS1698716	ERR2305600	NA	23495_7#44	11	Lees et al	Netherlands	Europe	193	Sensitive	Sensitive	Sensitive	Absent	Absent	-
4484STDY6808882	ERS1698807	ERR2305271	NA	22695_3#230	11	Lees et al	Netherlands	Europe	8711	Sensitive	Resistant	Sensitive	Absent	Absent	-
4484STDY6808642	ERS1698570	ERR2305129	NA	22695_3#88	11	Lees et al	Netherlands	Europe	1262	Sensitive	Resistant	Sensitive	Absent	Absent	-
4484STDY6632064	ERS1460273	ERR1947798	NA	21946_6#278	11	Lees et al	Netherlands	Europe	1262	Sensitive	Resistant	Sensitive	Absent	Absent	-
4484STDY6631989	ERS1460199	ERR1947725	NA	21946_6#205	11	Lees et al	Netherlands	Europe	1262	Sensitive	Resistant	Sensitive	Absent	Absent	-
4484STDY6631980	ERS1460190	ERR1947716	NA	21946_6#196	11	Lees et al	Netherlands	Europe	1262	Sensitive	Resistant	Sensitive	Absent	Absent	-
4484STDY6808459	ERS1698388	ERR2305368	NA	22709_8#281	11	Lees et al	Netherlands	Europe	1262	Sensitive	Resistant	Sensitive	Absent	Absent	-
4484STDY6632431	ERS1460634	ERR1947427	NA	21903_8#273	11	Lees et al	Netherlands	Europe	193	Sensitive	Sensitive	Sensitive	Absent	Absent	-
4484STDY6808855	ERS1698780	ERR2305244	NA	22695_3#203	11	Lees et al	Netherlands	Europe	1877	Sensitive	Sensitive	Sensitive	Absent	Absent	-
4484STDY6809073	ERS1698996	ERR2305365	NA	22695_3#324	11	Lees et al	Netherlands	Europe	193	Sensitive	Resistant	Sensitive	Absent	Absent	-
4484STDY6632588	ERS1460790	ERR1947582	NA	21946_6#62	11	Lees et al	Netherlands	Europe	193	Sensitive	Sensitive	Sensitive	Absent	Absent	-
4484STDY6808751	ERS1698677	ERR2305561	NA	23495_7#5	11	Lees et al	Netherlands	Europe	193	Sensitive	Sensitive	Sensitive	Absent	Absent	-
4484STDY6808899	ERS1698824	ERR2305288	NA	22695_3#247	11	Lees et al	Netherlands	Europe	2473	Sensitive	Sensitive	Sensitive	Absent	Present	-
4484STDY6808534	ERS1698463	ERR2305443	NA	22709_8#356	11	Lees et al	Netherlands	Europe	1262	Sensitive	Resistant	Sensitive	Absent	Absent	-
4484STDY6631965	ERS1460175	ERR1947701	NA	21946_6#181	11	Lees et al	Netherlands	Europe	1262	Sensitive	Resistant	Sensitive	Absent	Absent	-
4484STDY6809005	ERS1698929	ERR2305528	NA	22984_8#66	11	Lees et al	Netherlands	Europe	1262	Sensitive	Resistant	Sensitive	Absent	Absent	-
2842STDY5644006	ERS367446	ERR461447	GCA_900020605	11861_1#72	11	Lees et al	Netherlands	Europe	1262	Sensitive	Resistant	Sensitive	Absent	Absent	-
2842STDY5644206	ERS367644	ERR461897	NA	11893_1#73	11	Lees et al	Netherlands	Europe	1228~	Sensitive	Sensitive	Sensitive	Absent	Absent	-
2842STDY5643942	ERS367382	ERR461385	NA	11861_1#7	11	Lees et al	Netherlands	Europe	1262	Sensitive	Resistant	Sensitive	Absent	Absent	-
4484STDY6632512	ERS1460715	ERR1947508	NA	21903_8#354	11	Lees et al	Netherlands	Europe	1262	Sensitive	Resistant	Sensitive	Absent	Absent	-
4484STDY6632358	ERS1460563	ERR1947356	NA	21903_8#202	11	Lees et al	Netherlands	Europe	1262	Sensitive	Resistant	Sensitive	Absent	Absent	-
4484STDY6632701	ERS1461750	ERR1947691	NA	21946_6#171	11	Lees et al	Netherlands	Europe	1877	Sensitive	Sensitive	Sensitive	Absent	Absent	-
4484STDY6809033	ERS1698976	ERR2305556	NA	22984_8#94	11	Lees et al	Netherlands	Europe	193	Sensitive	Sensitive	Sensitive	Absent	Absent	-
2842STDY5644102	ERS367541	ERR461534	GCA_900023565	11861_2#69	11	Lees et al	Netherlands	Europe	1262	Sensitive	Resistant	Sensitive	Absent	Absent	-
4484STDY6632203	ERS1460410	ERR1947205	NA	21903_8#51	11	Lees et al	Netherlands	Europe	1358	Sensitive	Sensitive	Sensitive	Absent	Absent	-
4484STDY6632464	ERS1460667	ERR1947460	NA	21903_8#306	11	Lees et al	Netherlands	Europe	193	Sensitive	Sensitive	Sensitive	Absent	Absent	-
4484STDY6632233	ERS1460439	ERR1947234	NA	21903_8#80	11	Lees et al	Netherlands	Europe	1262	Sensitive	Resistant	Sensitive	Absent	Absent	-
4484STDY6632550	ERS1460752	ERR1947544	NA	21946_6#24	11	Lees et al	Netherlands	Europe	1262	Sensitive	Resistant	Sensitive	Absent	Absent	-
4484STDY6632219	ERS1460426	ERR1947221	NA	21903_8#67	11	Lees et al	Netherlands	Europe	1262	Sensitive	Resistant	Sensitive	Absent	Absent	-
4484STDY6808658	ERS1698585	ERR2305144	NA	22695_3#103	11	Lees et al	Netherlands	Europe	193	Sensitive	Sensitive	Sensitive	Absent	Absent	-
4484STDY6632549	ERS1460751	ERR1947543	NA	21946_6#23	11	Lees et al	Netherlands	Europe	1262	Sensitive	Resistant	Sensitive	Absent	Absent	-
4484STDY6808669	ERS1698596	ERR2305155	NA	22695_3#114	11	Lees et al	Netherlands	Europe	8711	Sensitive	Resistant	Sensitive	Absent	Absent	-
4484STDY6632467	ERS1460670	ERR1947463	NA	21903_8#309	11	Lees et al	Netherlands	Europe	193	Sensitive	Resistant	Sensitive	Absent	Absent	-
2842STDY5644494	ERS367925	ERR461263	GCA_900026415	11860_7#74	11	Lees et al	Netherlands	Europe	193	Sensitive	Resistant	Sensitive	Absent	Absent	-
4484STDY6632058	ERS1460267	ERR1947792	NA	21946_6#272	11	Lees et al	Netherlands	Europe	1262	Sensitive	Resistant	Sensitive	Absent	Absent	-
4484STDY6632220	ERS1460427	ERR1947222	NA	21903_8#68	11	Lees et al	Netherlands	Europe	1262	Sensitive	Resistant	Sensitive	Absent	Absent	-
2842STDY5644307	ERS367744	ERR461631	NA	11861_3#80	11	Lees et al	Netherlands	Europe	1262	Sensitive	Resistant	Sensitive	Absent	Absent	-
4484STDY6632234	ERS1460440	ERR1947235	NA	21903_8#81	11	Lees et al	Netherlands	Europe	1262	Sensitive	Resistant	Sensitive	Absent	Absent	-
4484STDY6632709	ERS1461758	ERR1947699	NA	21946_6#179	11	Lees et al	Netherlands	Europe	1262	Sensitive	Resistant	Sensitive	Absent	Absent	-
4484STDY6808599	ERS1698527	ERR2305086	NA	22695_3#45	11	Lees et al	Netherlands	Europe	1262	Sensitive	Resistant	Sensitive	Absent	Absent	-
4484STDY6632518	ERS1460721	ERR1947514	NA	21903_8#360	11	Lees et al	Netherlands	Europe	8711	Sensitive	Resistant	Sensitive	Absent	Absent	-
4484STDY6808839	ERS1698765	ERR2305648	NA	23495_7#92	11	Lees et al	Netherlands	Europe	8711	Sensitive	Resistant	Sensitive	Absent	Absent	-
4484STDY6808598	ERS1698526	ERR2305085	NA	22695_3#44	11	Lees et al	Netherlands	Europe	193	Sensitive	Sensitive	Sensitive	Absent	Absent	-
4484STDY6808928	ERS1698853	ERR2305317	NA	22695_3#276	11	Lees et al	Netherlands	Europe	1877	Sensitive	Sensitive	Sensitive	Absent	Absent	-
4484STDY6808660	ERS1698587	ERR2305146	NA	22695_3#105	11	Lees et al	Netherlands	Europe	193	Sensitive	Sensitive	Sensitive	Absent	Absent	-
4484STDY6808509	ERS1698438	ERR2305418	NA	22709_8#331	11	Lees et al	Netherlands	Europe	193	Sensitive	Sensitive	Sensitive	Absent	Absent	-
4484STDY6632303	ERS1460509	ERR1947303	NA	21903_8#149	11	Lees et al	Netherlands	Europe	1262	Sensitive	Resistant	Sensitive	Absent	Absent	-
4484STDY6632533	ERS1460735	ERR1947527	NA	21946_6#7	11	Lees et al	Netherlands	Europe	193	Sensitive	Sensitive	Sensitive	Absent	Absent	-
4484STDY6632107	ERS1460316	ERR1947841	NA	21946_6#321	11	Lees et al	Netherlands	Europe	1262	Sensitive	Resistant	Sensitive	Absent	Absent	-
4484STDY6632581	ERS1460783	ERR1947575	NA	21946_6#55	11	Lees et al	Netherlands	Europe	193	Sensitive	Sensitive	Sensitive	Absent	Absent	-
4484STDY6632061	ERS1460270	ERR1947795	NA	21946_6#275	11	Lees et al	Netherlands	Europe	193	Sensitive	Sensitive	Sensitive	Absent	Absent	-
4484STDY6632415	ERS1460620	ERR1947413	NA	21903_8#259	11	Lees et al	Netherlands	Europe	1533	Sensitive	Sensitive	Sensitive	Absent	Absent	-
4484STDY6808714	ERS1698641	ERR2305200	NA	22695_3#159	11	Lees et al	Netherlands	Europe	193	Sensitive	Resistant	Sensitive	Absent	Present	-
4484STDY6632227	ERS1460434	ERR1947229	NA	21903_8#75	11	Lees et al	Netherlands	Europe	193	Sensitive	Sensitive	Sensitive	Absent	Absent	-
4484STDY6808568	ERS1698496	ERR2305055	NA	22695_3#14	11	Lees et al	Netherlands	Europe	1262	Sensitive	Resistant	Sensitive	Absent	Absent	-
4484STDY6632331	ERS1460536	ERR1947330	NA	21903_8#176	11	Lees et al	Netherlands	Europe	8711	Sensitive	Resistant	Sensitive	Absent	Absent	-
4484STDY6808965	ERS1698889	ERR2305488	NA	22984_8#26	11	Lees et al	Netherlands	Europe	1262	Sensitive	Resistant	Sensitive	Absent	Absent	-
4484STDY6808702	ERS1698629	ERR2305188	NA	22695_3#147	11	Lees et al	Netherlands	Europe	8711	Sensitive	Resistant	Sensitive	Absent	Absent	-
4484STDY6632702	ERS1461751	ERR1947692	NA	21946_6#172	11	Lees et al	Netherlands	Europe	193	Sensitive	Resistant	Sensitive	Absent	Absent	-
2842STDY5644145	ERS367583	ERR461842	GCA_900047045	11893_1#15	11	Lees et al	Netherlands	Europe	8711	Sensitive	Resistant	Sensitive	Absent	Absent	-
4484STDY6632672	ERS1461722	ERR1947664	NA	21946_6#144	11	Lees et al	Netherlands	Europe	1262	Sensitive	Resistant	Sensitive	Absent	Absent	-
4484STDY6632045	ERS1460254	ERR1947780	NA	21946_6#260	11	Lees et al	Netherlands	Europe	1262	Sensitive	Resistant	Sensitive	Absent	Absent	-
4484STDY6808812	ERS1698738	ERR2305622	NA	23495_7#66	11	Lees et al	Netherlands	Europe	1262~	Sensitive	Resistant	Sensitive	Present	Present	-
4484STDY6808744	ERS1698671	ERR2305230	NA	22695_3#189	11	Lees et al	Netherlands	Europe	1262	Sensitive	Resistant	Sensitive	Absent	Absent	-
4484STDY6632446	ERS1460649	ERR1947442	NA	21903_8#288	11	Lees et al	Netherlands	Europe	193	Sensitive	Sensitive	Sensitive	Absent	Absent	-
4484STDY6808848	ERS1698773	ERR2305237	NA	22695_3#196	11	Lees et al	Netherlands	Europe	1877	Sensitive	Sensitive	Sensitive	Absent	Absent	-
4484STDY6632535	ERS1460737	ERR1947529	NA	21946_6#9	11	Lees et al	Netherlands	Europe	193	Sensitive	Sensitive	Sensitive	Absent	Absent	-
2842STDY5644312	ERS367749	ERR461635	NA	11861_3#84	11	Lees et al	Netherlands	Europe	1228~	Sensitive	Sensitive	Sensitive	Absent	Absent	-
4484STDY6808655	ERS1698582	ERR2305141	NA	22695_3#100	11	Lees et al	Netherlands	Europe	1877	Sensitive	Sensitive	Sensitive	Absent	Absent	-
4484STDY6632515	ERS1460718	ERR1947511	NA	21903_8#357	11	Lees et al	Netherlands	Europe	193	Sensitive	Sensitive	Sensitive	Absent	Absent	-
4484STDY6808695	ERS1698622	ERR2305181	NA	22695_3#140	11	Lees et al	Netherlands	Europe	193	Sensitive	Sensitive	Sensitive	Absent	Absent	-
4484STDY6808760	ERS1698686	ERR2305570	NA	23495_7#14	11	Lees et al	Netherlands	Europe	1262	Sensitive	Resistant	Sensitive	Absent	Absent	-
4484STDY6632157	ERS1460364	ERR1947159	NA	21903_8#5	11	Lees et al	Netherlands	Europe	1262	Sensitive	Resistant	Sensitive	Absent	Absent	-
4484STDY6631952	ERS1460162	ERR1947142	NA	21903_6#172	11	Lees et al	Netherlands	Europe	1262	Sensitive	Resistant	Sensitive	Absent	Absent	-
4484STDY6808796	ERS1698722	ERR2305606	NA	23495_7#50	11	Lees et al	Netherlands	Europe	13423	Sensitive	Sensitive	Intermediate	Absent	Absent	-
4484STDY6631960	ERS1460170	ERR1947150	NA	21903_6#180	11	Lees et al	Netherlands	Europe	1262	Sensitive	Resistant	Sensitive	Absent	Absent	-
4484STDY6632643	ERS1461693	ERR1947635	NA	21946_6#115	11	Lees et al	Netherlands	Europe	4828	Sensitive	Resistant	Sensitive	Absent	Absent	-
4484STDY6808659	ERS1698586	ERR2305145	NA	22695_3#104	11	Lees et al	Netherlands	Europe	193	Sensitive	Sensitive	Sensitive	Absent	Absent	-
4484STDY6808884	ERS1698809	ERR2305273	NA	22695_3#232	11	Lees et al	Netherlands	Europe	1262	Sensitive	Resistant	Sensitive	Absent	Absent	-
4484STDY6632554	ERS1460756	ERR1947548	NA	21946_6#28	11	Lees et al	Netherlands	Europe	8711	Sensitive	Resistant	Sensitive	Absent	Absent	-
4484STDY6632368	ERS1460573	ERR1947366	NA	21903_8#212	11	Lees et al	Netherlands	Europe	1262	Sensitive	Resistant	Sensitive	Absent	Absent	-
4484STDY6808994	ERS1698918	ERR2305517	NA	22984_8#55	11	Lees et al	Netherlands	Europe	4828~	Resistant	Resistant	Sensitive	Absent	Absent	-
4484STDY6809057	ERS1698980	ERR2305349	NA	22695_3#308	11	Lees et al	Netherlands	Europe	1262	Sensitive	Resistant	Sensitive	Absent	Absent	-
4484STDY6808633	ERS1698561	ERR2305120	NA	22695_3#79	11	Lees et al	Netherlands	Europe	4828	Sensitive	Resistant	Sensitive	Absent	Absent	-
4484STDY6808494	ERS1698423	ERR2305403	NA	22709_8#316	11	Lees et al	Netherlands	Europe	193	Sensitive	Sensitive	Sensitive	Absent	Absent	-
4484STDY6632530	ERS1460732	ERR1947524	NA	21946_6#4	11	Lees et al	Netherlands	Europe	1262	Sensitive	Resistant	Sensitive	Absent	Absent	-
4484STDY6632411	ERS1460616	ERR1947409	NA	21903_8#255	11	Lees et al	Netherlands	Europe	193~	Sensitive	Sensitive	Sensitive	Absent	Absent	-
4484STDY6632381	ERS1460586	ERR1947379	NA	21903_8#225	11	Lees et al	Netherlands	Europe	8711	Sensitive	Resistant	Sensitive	Absent	Absent	-
4484STDY6808572	ERS1698500	ERR2305059	NA	22695_3#18	11	Lees et al	Netherlands	Europe	1228~	Sensitive	Sensitive	Sensitive	Absent	Absent	-
4484STDY6632649	ERS1461699	ERR1947641	NA	21946_6#121	11	Lees et al	Netherlands	Europe	1877	Sensitive	Sensitive	Sensitive	Absent	Absent	-
4484STDY6632191	ERS1460398	ERR1947193	NA	21903_8#39	11	Lees et al	Netherlands	Europe	193~	Sensitive	Sensitive	Sensitive	Absent	Absent	-
4484STDY6632125	ERS1460333	ERR1947858	NA	21946_6#338	11	Lees et al	Netherlands	Europe	1262	Sensitive	Resistant	Sensitive	Absent	Absent	-
4484STDY6631979	ERS1460189	ERR1947715	NA	21946_6#195	11	Lees et al	Netherlands	Europe	193	Sensitive	Sensitive	Sensitive	Absent	Absent	-
4484STDY6632065	ERS1460274	ERR1947799	NA	21946_6#279	11	Lees et al	Netherlands	Europe	1262	Sensitive	Resistant	Sensitive	Absent	Absent	-
4484STDY6632102	ERS1460311	ERR1947836	NA	21946_6#316	11	Lees et al	Netherlands	Europe	1262	Sensitive	Resistant	Sensitive	Absent	Absent	-
4484STDY6632508	ERS1460711	ERR1947504	NA	21903_8#350	11	Lees et al	Netherlands	Europe	193	Sensitive	Sensitive	Sensitive	Absent	Absent	-
4484STDY6808486	ERS1698415	ERR2305395	NA	22709_8#308	11	Lees et al	Netherlands	Europe	193	Sensitive	Sensitive	Sensitive	Absent	Absent	-
4484STDY6632242	ERS1460448	ERR1947243	NA	21903_8#89	11	Lees et al	Netherlands	Europe	1262	Sensitive	Resistant	Sensitive	Absent	Absent	-
4484STDY6808850	ERS1698775	ERR2305239	NA	22695_3#198	11	Lees et al	Netherlands	Europe	1262	Sensitive	Resistant	Sensitive	Absent	Absent	-
4484STDY6632598	ERS1460800	ERR1947591	NA	21946_6#71	11	Lees et al	Netherlands	Europe	1262	Sensitive	Resistant	Sensitive	Absent	Absent	-
4484STDY6809031	ERS1698974	ERR2305554	NA	22984_8#92	11	Lees et al	Netherlands	Europe	193~	Sensitive	Sensitive	Sensitive	Absent	Absent	-
4484STDY6632015	ERS1460225	ERR1947751	NA	21946_6#231	11	Lees et al	Netherlands	Europe	193	Sensitive	Resistant	Sensitive	Absent	Absent	-
4484STDY6808851	ERS1698776	ERR2305240	NA	22695_3#199	11	Lees et al	Netherlands	Europe	193	Sensitive	Sensitive	Sensitive	Absent	Absent	-
4484STDY6632659	ERS1461709	ERR1947651	NA	21946_6#131	11	Lees et al	Netherlands	Europe	193	Sensitive	Sensitive	Sensitive	Absent	Absent	-
2842STDY5644565	ERS367995	ERR461333	GCA_900017795	11860_8#51	12	Lees et al	Netherlands	Europe	180	Sensitive	Sensitive	Sensitive	Absent	Absent	-
2842STDY5644100	ERS367539	ERR461532	NA	11861_2#67	12	Lees et al	Netherlands	Europe	180	Sensitive	Sensitive	Sensitive	Absent	Absent	-
2842STDY5644567	ERS367997	ERR461335	NA	11860_8#53	12	Lees et al	Netherlands	Europe	180	Sensitive	Sensitive	Sensitive	Absent	Absent	-
2842STDY5644189	ERS367627	ERR450622	NA	11822_8#51	12	Lees et al	Netherlands	Europe	180	Sensitive	Sensitive	Sensitive	Absent	Absent	-
2842STDY5753133	ERS408918	ERR554879	NA	12673_6#48	12	Lees et al	Netherlands	Europe	180	Sensitive	Sensitive	Sensitive	Absent	Absent	-
2842STDY5753813	ERS409591	ERR563999	GCA_900018535	12754_4#56	12	Lees et al	Netherlands	Europe	180	Sensitive	Sensitive	Sensitive	Absent	Absent	-
2842STDY5644348	ERS367784	ERR461670	NA	11861_4#24	12	Lees et al	Netherlands	Europe	180	Sensitive	Sensitive	Sensitive	Absent	Absent	-
2842STDY5644175	ERS367613	ERR461869	NA	11893_1#45	12	Lees et al	Netherlands	Europe	180	Sensitive	Sensitive	Sensitive	Absent	Absent	-
2842STDY5643863	ERS367304	ERR461123	GCA_900023335	11860_6#25	12	Lees et al	Netherlands	Europe	180	Sensitive	Sensitive	Sensitive	Absent	Absent	-
2842STDY5753121	ERS408906	ERR554867	GCA_900030045	12673_6#36	12	Lees et al	Netherlands	Europe	180	Sensitive	Sensitive	Sensitive	Absent	Absent	-
4484STDY6808906	ERS1698831	ERR2305295	NA	22695_3#254	12	Lees et al	Netherlands	Europe	180~	Sensitive	Sensitive	Sensitive	Absent	Absent	-
4484STDY6808694	ERS1698621	ERR2305180	NA	22695_3#139	12	Lees et al	Netherlands	Europe	180	Sensitive	Sensitive	Sensitive	Absent	Absent	-
4484STDY6632080	ERS1460289	ERR1947814	NA	21946_6#294	12	Lees et al	Netherlands	Europe	180	Sensitive	Sensitive	Sensitive	Absent	Absent	-
4484STDY6632225	ERS1460432	ERR1947227	NA	21903_8#73	12	Lees et al	Netherlands	Europe	180	Sensitive	Sensitive	Sensitive	Absent	Absent	-
2842STDY5644058	ERS367497	ERR461491	NA	11861_2#24	12	Lees et al	Netherlands	Europe	180	Sensitive	Sensitive	Sensitive	Absent	Absent	-
2842STDY5644510	ERS367940	ERR461278	GCA_900046905	11860_7#89	12	Lees et al	Netherlands	Europe	180	Sensitive	Sensitive	Sensitive	Absent	Absent	-
2842STDY5753818	ERS409596	ERR564004	NA	12754_4#61	12	Lees et al	Netherlands	Europe	180	Sensitive	Sensitive	Sensitive	Absent	Absent	-
2842STDY5643815	ERS367257	ERR461078	NA	11860_5#75	12	Lees et al	Netherlands	Europe	180	Sensitive	Sensitive	Sensitive	Absent	Absent	-
2842STDY5644126	ERS367564	ERR502543	GCA_900020635	12273_1#87	12	Lees et al	Netherlands	Europe	180	Sensitive	Sensitive	Sensitive	Absent	Absent	-
2842STDY5644436	ERS367868	ERR461206	GCA_900025855	11860_7#15	12	Lees et al	Netherlands	Europe	180	Sensitive	Sensitive	Sensitive	Absent	Absent	-
2842STDY5644157	ERS367595	ERR461852	GCA_900042875	11893_1#26	12	Lees et al	Netherlands	Europe	180	Sensitive	Sensitive	Sensitive	Absent	Absent	-
4484STDY6632572	ERS1460774	ERR1947566	NA	21946_6#46	12	Lees et al	Netherlands	Europe	180	Sensitive	Sensitive	Sensitive	Absent	Absent	-
2842STDY5644048	ERS367487	ERR461481	NA	11861_2#14	12	Lees et al	Netherlands	Europe	180	Sensitive	Sensitive	Sensitive	Absent	Absent	-
2842STDY5643886	ERS367327	ERR461146	GCA_900029945	11860_6#50	12	Lees et al	Netherlands	Europe	180	Sensitive	Sensitive	Sensitive	Absent	Absent	-
4484STDY6631944	ERS1460154	ERR1947134	NA	21903_6#164	12	Lees et al	Netherlands	Europe	180	Sensitive	Sensitive	Sensitive	Absent	Absent	-
2842STDY5644136	ERS367574	ERR461833	NA	11893_1#5	12	Lees et al	Netherlands	Europe	180	Sensitive	Sensitive	Sensitive	Absent	Absent	-
2842STDY5644009	ERS367449	ERR461450	GCA_900022275	11861_1#75	12	Lees et al	Netherlands	Europe	180	Sensitive	Sensitive	Sensitive	Absent	Absent	-
2842STDY5753157	ERS408942	ERR554903	NA	12673_6#72	12	Lees et al	Netherlands	Europe	180	Sensitive	Sensitive	Sensitive	Absent	Absent	-
2842STDY5643688	ERS367131	ERR460960	NA	11860_4#46	12	Lees et al	Netherlands	Europe	180	Sensitive	Sensitive	Sensitive	Absent	Absent	-
2842STDY5643977	ERS367417	ERR461418	GCA_900032815	11861_1#42	12	Lees et al	Netherlands	Europe	180	Sensitive	Sensitive	Sensitive	Absent	Absent	-
2842STDY5644001	ERS367441	ERR461442	NA	11861_1#67	12	Lees et al	Netherlands	Europe	180	Sensitive	Sensitive	Sensitive	Absent	Absent	-
2842STDY5643915	ERS367356	ERR461174	GCA_900037125	11860_6#78	12	Lees et al	Netherlands	Europe	180	Sensitive	Sensitive	Sensitive	Absent	Absent	-
2842STDY5643995	ERS367435	ERR461436	NA	11861_1#61	12	Lees et al	Netherlands	Europe	180	Sensitive	Sensitive	Sensitive	Absent	Absent	-
2842STDY5644168	ERS367606	ERR461862	NA	11893_1#37	12	Lees et al	Netherlands	Europe	180	Sensitive	Sensitive	Sensitive	Absent	Absent	-
2842STDY5643691	ERS367134	ERR460963	NA	11860_4#49	12	Lees et al	Netherlands	Europe	180	Sensitive	Sensitive	Sensitive	Absent	Absent	-
2842STDY5644015	ERS367455	ERR502539	NA	12273_1#83	12	Lees et al	Netherlands	Europe	180	Sensitive	Sensitive	Sensitive	Absent	Absent	-
4484STDY6631963	ERS1460173	ERR1947153	NA	21903_6#183	12	Lees et al	Netherlands	Europe	180	Sensitive	Sensitive	Sensitive	Absent	Absent	-
2842STDY5753820	ERS409598	ERR564006	GCA_900047695	12754_4#63	12	Lees et al	Netherlands	Europe	180	Sensitive	Sensitive	Sensitive	Absent	Absent	-
4484STDY6632056	ERS1460265	ERR1947790	NA	21946_6#270	12	Lees et al	Netherlands	Europe	180	Sensitive	Sensitive	Sensitive	Absent	Absent	-
2842STDY5643902	ERS367343	ERR461161	GCA_900018915	11860_6#65	12	Lees et al	Netherlands	Europe	180	Sensitive	Sensitive	Sensitive	Absent	Absent	-
4484STDY6632568	ERS1460770	ERR1947562	NA	21946_6#42	12	Lees et al	Netherlands	Europe	180	Sensitive	Sensitive	Sensitive	Absent	Absent	-
4484STDY6632656	ERS1461706	ERR1947648	NA	21946_6#128	12	Lees et al	Netherlands	Europe	180	Sensitive	Sensitive	Sensitive	Absent	Absent	-
2842STDY5643969	ERS367409	ERR461411	NA	11861_1#35	12	Lees et al	Netherlands	Europe	4735	Sensitive	Sensitive	Sensitive	Absent	Absent	-
2842STDY5644108	ERS367547	ERR461540	GCA_900023585	11861_2#75	12	Lees et al	Netherlands	Europe	180	Sensitive	Sensitive	Sensitive	Absent	Absent	-
2842STDY5643952	ERS367392	ERR450611	GCA_900023925	11822_8#39	12	Lees et al	Netherlands	Europe	180	Sensitive	Sensitive	Sensitive	Absent	Absent	-
2842STDY5643975	ERS367415	ERR461416	NA	11861_1#40	12	Lees et al	Netherlands	Europe	180~	Sensitive	Sensitive	Sensitive	Absent	Absent	-
4484STDY6632360	ERS1460565	ERR1947358	NA	21903_8#204	12	Lees et al	Netherlands	Europe	180	Sensitive	Sensitive	Sensitive	Absent	Absent	-
2842STDY5644560	ERS367990	ERR461328	NA	11860_8#46	12	Lees et al	Netherlands	Europe	180	Sensitive	Sensitive	Sensitive	Absent	Absent	-
2842STDY5644068	ERS367507	ERR461501	NA	11861_2#35	12	Lees et al	Netherlands	Europe	180	Sensitive	Sensitive	Sensitive	Absent	Absent	-
2842STDY5643810	ERS367252	ERR450606	NA	11822_8#34	12	Lees et al	Netherlands	Europe	180	Sensitive	Sensitive	Sensitive	Absent	Absent	-
2842STDY5644019	ERS367459	ERR461456	NA	11861_1#82	12	Lees et al	Netherlands	Europe	180	Sensitive	Sensitive	Sensitive	Absent	Absent	-
4484STDY6808957	ERS1698881	ERR2305480	NA	22984_8#18	12	Lees et al	Netherlands	Europe	180	Sensitive	Sensitive	Sensitive	Absent	Absent	-
2842STDY5644490	ERS367921	ERR461259	GCA_900018805	11860_7#70	12	Lees et al	Netherlands	Europe	180	Sensitive	Sensitive	Sensitive	Absent	Absent	-
2842STDY5881946	ERS515217	ERR716240	NA	14412_3#63	12	Lees et al	Netherlands	Europe	180	Sensitive	Sensitive	Sensitive	Absent	Absent	-
2842STDY5753816	ERS409594	ERR564002	NA	12754_4#59	12	Lees et al	Netherlands	Europe	180	Sensitive	Sensitive	Sensitive	Absent	Absent	-
4484STDY6632619	ERS1461669	ERR1947611	NA	21946_6#91	12	Lees et al	Netherlands	Europe	8561	Sensitive	Sensitive	Sensitive	Absent	Absent	-
2842STDY5644139	ERS367577	ERR461836	NA	11893_1#9	12	Lees et al	Netherlands	Europe	180	Sensitive	Sensitive	Sensitive	Absent	Absent	-
2842STDY5881855	ERS515110	ERR716151	GCA_900029485	14355_8#68	12	Lees et al	Netherlands	Europe	180	Sensitive	Sensitive	Sensitive	Absent	Absent	-
2842STDY5644640	ERS368069	ERR461769	GCA_900018415	11861_5#30	12	Lees et al	Netherlands	Europe	180	Sensitive	Sensitive	Sensitive	Absent	Absent	-
2842STDY5644116	ERS367555	ERR461547	NA	11861_2#82	12	Lees et al	Netherlands	Europe	180	Sensitive	Sensitive	Sensitive	Absent	Absent	-
2842STDY5643903	ERS367344	ERR461162	NA	11860_6#66	12	Lees et al	Netherlands	Europe	180	Sensitive	Sensitive	Sensitive	Absent	Absent	-
2842STDY5643651	ERS367094	ERR460923	NA	11860_4#6	12	Lees et al	Netherlands	Europe	180	Sensitive	Sensitive	Sensitive	Absent	Absent	-
2842STDY5644563	ERS367993	ERR461331	GCA_900047565	11860_8#49	12	Lees et al	Netherlands	Europe	180	Sensitive	Sensitive	Sensitive	Absent	Absent	-
2842STDY5644460	ERS367891	ERR461229	GCA_900023735	11860_7#39	12	Lees et al	Netherlands	Europe	180	Sensitive	Sensitive	Sensitive	Absent	Absent	-
2842STDY5643737	ERS367180	ERR485960	GCA_900023895	12045_8#82	12	Lees et al	Netherlands	Europe	180	Sensitive	Sensitive	Sensitive	Absent	Absent	-
4484STDY6632522	ERS1460724	ERR1947516	NA	21903_8#362	12	Lees et al	Netherlands	Europe	180	Sensitive	Sensitive	Sensitive	Absent	Absent	-
2842STDY5644515	ERS367945	ERR461283	NA	11860_7#94	12	Lees et al	Netherlands	Europe	180	Sensitive	Sensitive	Sensitive	Absent	Absent	-
2842STDY5644131	ERS367569	ERR502548	GCA_900023595	12273_1#92	12	Lees et al	Netherlands	Europe	180	Sensitive	Sensitive	Sensitive	Absent	Absent	-
4484STDY6632181	ERS1460388	ERR1947183	NA	21903_8#29	12	Lees et al	Netherlands	Europe	180	Sensitive	Sensitive	Sensitive	Absent	Absent	-
4484STDY6632361	ERS1460566	ERR1947359	NA	21903_8#205	12	Lees et al	Netherlands	Europe	180	Sensitive	Sensitive	Sensitive	Absent	Absent	-
2842STDY5644667	ERS368095	ERR461795	NA	11861_5#58	12	Lees et al	Netherlands	Europe	180	Sensitive	Sensitive	Sensitive	Absent	Absent	-
2842STDY5644135	ERS367573	ERR461832	GCA_900017445	11893_1#4	12	Lees et al	Netherlands	Europe	180	Sensitive	Sensitive	Sensitive	Absent	Absent	-
2842STDY5644415	ERS367848	ERR461734	GCA_900023625	11861_4#90	12	Lees et al	Netherlands	Europe	180	Sensitive	Sensitive	Sensitive	Absent	Absent	-
4484STDY6808552	ERS1698481	ERR2305461	NA	22709_8#374	12	Lees et al	Netherlands	Europe	180	Sensitive	Sensitive	Sensitive	Absent	Absent	-
2842STDY5643675	ERS367118	ERR460947	GCA_900020015	11860_4#32	12	Lees et al	Netherlands	Europe	180	Sensitive	Sensitive	Sensitive	Absent	Absent	-
2842STDY5644361	ERS367797	ERR461683	GCA_900028805	11861_4#38	12	Lees et al	Netherlands	Europe	180	Sensitive	Sensitive	Sensitive	Absent	Absent	-
2842STDY5644325	ERS367761	ERR461647	GCA_900025905	11861_3#96	12	Lees et al	Netherlands	Europe	180	Sensitive	Sensitive	Sensitive	Absent	Absent	-
2842STDY5643711	ERS367154	ERR460983	NA	11860_4#69	12	Lees et al	Netherlands	Europe	180	Sensitive	Sensitive	Sensitive	Absent	Absent	-
2842STDY5644353	ERS367789	ERR461675	GCA_900025915	11861_4#29	12	Lees et al	Netherlands	Europe	180	Sensitive	Sensitive	Sensitive	Absent	Absent	-
2842STDY5643906	ERS367347	ERR461165	NA	11860_6#69	12	Lees et al	Netherlands	Europe	180	Sensitive	Sensitive	Sensitive	Absent	Absent	-
2842STDY5644277	ERS367714	ERR461601	GCA_900028235	11861_3#50	12	Lees et al	Netherlands	Europe	180	Sensitive	Sensitive	Sensitive	Absent	Absent	-
2842STDY5644558	ERS367988	ERR461326	NA	11860_8#44	12	Lees et al	Netherlands	Europe	180	Sensitive	Sensitive	Sensitive	Absent	Absent	-
4484STDY6809059	ERS1698982	ERR2305351	NA	22695_3#310	12	Lees et al	Netherlands	Europe	180	Sensitive	Sensitive	Sensitive	Absent	Absent	-
4484STDY6632351	ERS1460556	ERR1947349	NA	21903_8#195	12	Lees et al	Netherlands	Europe	180	Sensitive	Sensitive	Sensitive	Absent	Absent	-
2842STDY5643831	ERS367273	ERR461094	NA	11860_5#91	12	Lees et al	Netherlands	Europe	180	Sensitive	Sensitive	Sensitive	Absent	Absent	-
2842STDY5644469	ERS367900	ERR461238	NA	11860_7#49	12	Lees et al	Netherlands	Europe	180	Sensitive	Sensitive	Sensitive	Absent	Absent	-
4484STDY6632605	ERS1461656	ERR1947598	NA	21946_6#78	12	Lees et al	Netherlands	Europe	180	Sensitive	Sensitive	Sensitive	Absent	Absent	-
4484STDY6632564	ERS1460766	ERR1947558	NA	21946_6#38	12	Lees et al	Netherlands	Europe	180	Sensitive	Sensitive	Sensitive	Absent	Absent	-
2842STDY5644055	ERS367494	ERR461488	NA	11861_2#21	12	Lees et al	Netherlands	Europe	180	Sensitive	Sensitive	Sensitive	Absent	Absent	-
2842STDY5644394	ERS367828	ERR461714	NA	11861_4#70	12	Lees et al	Netherlands	Europe	180~	Sensitive	Sensitive	Sensitive	Absent	Absent	-
2842STDY5644249	ERS367686	ERR461573	GCA_900021715	11861_3#20	12	Lees et al	Netherlands	Europe	180	Sensitive	Sensitive	Sensitive	Absent	Absent	-
4484STDY6632565	ERS1460767	ERR1947559	NA	21946_6#39	12	Lees et al	Netherlands	Europe	180	Sensitive	Sensitive	Sensitive	Absent	Absent	-
2842STDY5644350	ERS367786	ERR461672	GCA_900027635	11861_4#26	12	Lees et al	Netherlands	Europe	180	Sensitive	Sensitive	Sensitive	Absent	Absent	-
2842STDY5644248	ERS367685	ERR461572	GCA_900021705	11861_3#19	12	Lees et al	Netherlands	Europe	180	Sensitive	Sensitive	Sensitive	Absent	Absent	-
2842STDY5643868	ERS367309	ERR461128	GCA_900046965	11860_6#30	12	Lees et al	Netherlands	Europe	180	Sensitive	Sensitive	Sensitive	Absent	Absent	-
2842STDY5644292	ERS367729	ERR461616	GCA_900025215	11861_3#65	12	Lees et al	Netherlands	Europe	180~	Sensitive	Sensitive	Sensitive	Absent	Absent	-
2842STDY5644518	ERS367948	ERR461286	GCA_900016895	11860_8#1	12	Lees et al	Netherlands	Europe	180	Sensitive	Sensitive	Sensitive	Absent	Absent	-
4484STDY6632370	ERS1460575	ERR1947368	NA	21903_8#214	12	Lees et al	Netherlands	Europe	180	Sensitive	Sensitive	Sensitive	Absent	Absent	-
2842STDY5643677	ERS367120	ERR460949	NA	11860_4#34	12	Lees et al	Netherlands	Europe	180	Sensitive	Sensitive	Sensitive	Absent	Absent	-
4484STDY6632703	ERS1461752	ERR1947693	NA	21946_6#173	12	Lees et al	Netherlands	Europe	180	Sensitive	Sensitive	Sensitive	Absent	Absent	-
4484STDY6632133	ERS1460341	ERR1947866	NA	21946_6#346	12	Lees et al	Netherlands	Europe	180	Sensitive	Sensitive	Sensitive	Absent	Absent	-
2842STDY5643994	ERS367434	ERR461435	NA	11861_1#60	12	Lees et al	Netherlands	Europe	180	Sensitive	Sensitive	Sensitive	Absent	Absent	-
2842STDY5643999	ERS367439	ERR461440	GCA_900017895	11861_1#65	12	Lees et al	Netherlands	Europe	180	Sensitive	Sensitive	Sensitive	Absent	Absent	-
2842STDY5643946	ERS367386	ERR461389	NA	11861_1#12	12	Lees et al	Netherlands	Europe	180	Sensitive	Sensitive	Sensitive	Absent	Absent	-
2842STDY5644503	ERS367934	ERR461272	NA	11860_7#83	12	Lees et al	Netherlands	Europe	180	Sensitive	Sensitive	Sensitive	Absent	Absent	-
4484STDY6631971	ERS1460181	ERR1947707	NA	21946_6#187	12	Lees et al	Netherlands	Europe	180	Sensitive	Sensitive	Sensitive	Absent	Absent	-
4484STDY6808727	ERS1698654	ERR2305213	NA	22695_3#172	12	Lees et al	Netherlands	Europe	180	Sensitive	Sensitive	Sensitive	Absent	Absent	-
2842STDY5644223	ERS367660	ERR461912	NA	11893_1#89	12	Lees et al	Netherlands	Europe	180	Sensitive	Sensitive	Sensitive	Absent	Absent	-
4484STDY6808779	ERS1698705	ERR2305589	NA	23495_7#33	12	Lees et al	Netherlands	Europe	180	Sensitive	Sensitive	Sensitive	Absent	Absent	-
2842STDY5643710	ERS367153	ERR460982	GCA_900019475	11860_4#68	12	Lees et al	Netherlands	Europe	180	Sensitive	Sensitive	Sensitive	Absent	Absent	-
4484STDY6632081	ERS1460290	ERR1947815	NA	21946_6#295	12	Lees et al	Netherlands	Europe	180	Sensitive	Sensitive	Sensitive	Absent	Absent	-
2842STDY5644486	ERS367917	ERR461255	GCA_900020725	11860_7#66	12	Lees et al	Netherlands	Europe	180	Sensitive	Sensitive	Sensitive	Absent	Absent	-
2842STDY5643928	ERS367369	ERR461187	NA	11860_6#91	12	Lees et al	Netherlands	Europe	4735	Sensitive	Sensitive	Sensitive	Absent	Absent	-
4484STDY6632476	ERS1460679	ERR1947472	NA	21903_8#318	12	Lees et al	Netherlands	Europe	180	Sensitive	Sensitive	Sensitive	Absent	Absent	-
2842STDY5643673	ERS367116	ERR460945	NA	11860_4#29	12	Lees et al	Netherlands	Europe	180	Sensitive	Sensitive	Sensitive	Absent	Absent	-
2842STDY5643818	ERS367260	ERR461081	NA	11860_5#78	12	Lees et al	Netherlands	Europe	180	Sensitive	Sensitive	Sensitive	Absent	Absent	-
2842STDY5644517	ERS367947	ERR461285	GCA_900021265	11860_7#96	12	Lees et al	Netherlands	Europe	180	Sensitive	Sensitive	Sensitive	Absent	Absent	-
2842STDY5644202	ERS367640	ERR461893	GCA_900032835	11893_1#69	12	Lees et al	Netherlands	Europe	180	Sensitive	Sensitive	Sensitive	Absent	Absent	-
2842STDY5643984	ERS367424	ERR461425	NA	11861_1#50	12	Lees et al	Netherlands	Europe	180	Sensitive	Sensitive	Sensitive	Absent	Absent	-
2842STDY5644401	ERS367835	ERR461721	NA	11861_4#77	12	Lees et al	Netherlands	Europe	180	Sensitive	Sensitive	Sensitive	Absent	Absent	-
2842STDY5753814	ERS409592	ERR564000	NA	12754_4#57	12	Lees et al	Netherlands	Europe	180	Sensitive	Sensitive	Sensitive	Absent	Absent	-
4484STDY6632184	ERS1460391	ERR1947186	NA	21903_8#32	12	Lees et al	Netherlands	Europe	180	Sensitive	Sensitive	Sensitive	Absent	Absent	-
2842STDY5644694	ERS368122	ERR461822	NA	11861_5#85	12	Lees et al	Netherlands	Europe	180	Sensitive	Sensitive	Sensitive	Absent	Absent	-
4484STDY6631945	ERS1460155	ERR1947135	NA	21903_6#165	12	Lees et al	Netherlands	Europe	180	Sensitive	Sensitive	Sensitive	Absent	Absent	-
4484STDY6808853	ERS1698778	ERR2305242	NA	22695_3#201	12	Lees et al	Netherlands	Europe	180	Sensitive	Sensitive	Sensitive	Absent	Absent	-
2842STDY5644143	ERS367581	ERR461840	NA	11893_1#13	12	Lees et al	Netherlands	Europe	180	Sensitive	Sensitive	Sensitive	Absent	Absent	-
2842STDY5643696	ERS367139	ERR460968	NA	11860_4#54	12	Lees et al	Netherlands	Europe	180	Sensitive	Sensitive	Sensitive	Absent	Absent	-
2842STDY5644299	ERS367736	ERR461623	GCA_900036535	11861_3#72	12	Lees et al	Netherlands	Europe	180	Sensitive	Sensitive	Sensitive	Absent	Absent	-
2842STDY5644155	ERS367593	ERR461850	NA	11893_1#24	12	Lees et al	Netherlands	Europe	180	Sensitive	Sensitive	Sensitive	Absent	Absent	-
2842STDY5644140	ERS367578	ERR461837	NA	11893_1#10	12	Lees et al	Netherlands	Europe	180	Sensitive	Sensitive	Sensitive	Absent	Absent	-
4484STDY6632143	ERS1460350	ERR1947875	NA	21946_6#355	12	Lees et al	Netherlands	Europe	180	Sensitive	Sensitive	Sensitive	Absent	Absent	-
2842STDY5644343	ERS367779	ERR461665	NA	11861_4#19	12	Lees et al	Netherlands	Europe	180	Sensitive	Sensitive	Sensitive	Absent	Absent	-
4484STDY6632019	ERS1460229	ERR1947755	NA	21946_6#235	12	Lees et al	Netherlands	Europe	180	Sensitive	Sensitive	Sensitive	Absent	Absent	-
4484STDY6808696	ERS1698623	ERR2305182	NA	22695_3#141	12	Lees et al	Netherlands	Europe	180	Sensitive	Sensitive	Sensitive	Absent	Absent	-
2842STDY5881858	ERS515113	ERR716154	GCA_900025235	14355_8#71	12	Lees et al	Netherlands	Europe	180	Sensitive	Sensitive	Sensitive	Absent	Absent	-
2842STDY5644520	ERS367950	ERR461288	NA	11860_8#3	12	Lees et al	Netherlands	Europe	180	Sensitive	Sensitive	Sensitive	Absent	Absent	-
2842STDY5644432	ERS367864	ERR461202	NA	11860_7#11	12	Lees et al	Netherlands	Europe	180	Sensitive	Sensitive	Sensitive	Absent	Absent	-
2842STDY5644177	ERS367615	ERR461871	GCA_900024005	11893_1#47	13	Lees et al	Netherlands	Europe	813~	Sensitive	Resistant	Intermediate	Absent	Absent	-
2842STDY5644163	ERS367601	ERR461857	GCA_900022815	11893_1#32	13	Lees et al	Netherlands	Europe	398	Sensitive	Sensitive	Sensitive	Absent	Absent	-
2842STDY5881864	ERS515119	ERR716160	GCA_900047705	14355_8#77	13	Lees et al	Netherlands	Europe	497	Sensitive	Sensitive	Sensitive	Absent	Absent	-
2842STDY5881829	ERS515084	ERR716125	NA	14355_8#42	13	Lees et al	Netherlands	Europe	497	Sensitive	Resistant	Sensitive	Absent	Absent	-
4484STDY6632105	ERS1460314	ERR1947839	NA	21946_6#319	13	Lees et al	Netherlands	Europe	7009	Sensitive	Sensitive	Sensitive	Absent	Absent	-
2842STDY5644057	ERS367496	ERR461490	NA	11861_2#23	14	Lees et al	Netherlands	Europe	242	Sensitive	Resistant	Sensitive	Present	Present	-
2842STDY5644164	ERS367602	ERR461858	NA	11893_1#33	14	Lees et al	Netherlands	Europe	242	Resistant	Resistant	Resistant	Present	Present	-
2842STDY5643648	ERS367091	ERR460920	NA	11860_4#3	14	Lees et al	Netherlands	Europe	242	Sensitive	Resistant	Sensitive	Present	Present	-
2842STDY5643660	ERS367103	ERR460932	GCA_900046585	11860_4#16	15	Lees et al	Netherlands	Europe	191	Sensitive	Sensitive	Sensitive	Absent	Absent	-
2842STDY5643938	ERS367378	ERR461382	GCA_900023405	11861_1#4	15	Lees et al	Netherlands	Europe	191	Sensitive	Sensitive	Sensitive	Absent	Absent	-
2842STDY5644314	ERS367751	ERR461637	NA	11861_3#86	15	Lees et al	Netherlands	Europe	191	Sensitive	Sensitive	Sensitive	Absent	Absent	-
2842STDY5644333	ERS367769	ERR461655	NA	11861_4#9	15	Lees et al	Netherlands	Europe	191	Sensitive	Sensitive	Sensitive	Absent	Absent	-
2842STDY5644212	ERS367650	ERR496937	NA	12216_4#88	15	Lees et al	Netherlands	Europe	191	Sensitive	Sensitive	Sensitive	Absent	Absent	-
2842STDY5644382	ERS367818	ERR461704	NA	11861_4#60	15	Lees et al	Netherlands	Europe	191	Sensitive	Sensitive	Sensitive	Absent	Absent	-
2842STDY5644094	ERS367533	ERR461526	GCA_900022285	11861_2#61	15	Lees et al	Netherlands	Europe	191	Sensitive	Sensitive	Sensitive	Absent	Absent	-
2842STDY5644690	ERS368118	ERR461818	NA	11861_5#81	15	Lees et al	Netherlands	Europe	191	Sensitive	Sensitive	Sensitive	Absent	Absent	-
2842STDY5643921	ERS367362	ERR461180	GCA_900046985	11860_6#84	15	Lees et al	Netherlands	Europe	191	Sensitive	Sensitive	Sensitive	Absent	Absent	-
4484STDY6808951	ERS1698875	ERR2305474	NA	22984_8#12	15	Lees et al	Netherlands	Europe	191	Sensitive	Sensitive	Sensitive	Absent	Absent	-
4484STDY6631987	ERS1460197	ERR1947723	NA	21946_6#203	15	Lees et al	Netherlands	Europe	191	Sensitive	Sensitive	Sensitive	Absent	Absent	-
2842STDY5881843	ERS515098	ERR716139	GCA_900019625	14355_8#56	15	Lees et al	Netherlands	Europe	191	Sensitive	Sensitive	Sensitive	Absent	Absent	-
2842STDY5643924	ERS367365	ERR461183	GCA_900017005	11860_6#87	15	Lees et al	Netherlands	Europe	191	Sensitive	Sensitive	Sensitive	Absent	Absent	-
2842STDY5644079	ERS367518	ERR461511	GCA_900036655	11861_2#46	15	Lees et al	Netherlands	Europe	191	Sensitive	Sensitive	Sensitive	Absent	Absent	-
2842STDY5644608	ERS368037	ERR461375	GCA_900039265	11860_8#93	15	Lees et al	Netherlands	Europe	191	Sensitive	Sensitive	Sensitive	Absent	Absent	-
2842STDY5643736	ERS367179	ERR461004	GCA_900021425	11860_4#93	15	Lees et al	Netherlands	Europe	191	Sensitive	Sensitive	Sensitive	Absent	Absent	-
2842STDY5644005	ERS367445	ERR461446	GCA_900024575	11861_1#71	15	Lees et al	Netherlands	Europe	191	Sensitive	Sensitive	Sensitive	Absent	Absent	-
2842STDY5644521	ERS367951	ERR461289	NA	11860_8#4	15	Lees et al	Netherlands	Europe	191	Sensitive	Sensitive	Sensitive	Absent	Absent	-
2842STDY5644525	ERS367955	ERR461293	GCA_900035335	11860_8#9	15	Lees et al	Netherlands	Europe	191	Sensitive	Sensitive	Sensitive	Absent	Absent	-
2842STDY5643731	ERS367174	ERR460999	GCA_900022535	11860_4#88	15	Lees et al	Netherlands	Europe	191	Sensitive	Sensitive	Sensitive	Absent	Absent	-
2842STDY5753122	ERS408907	ERR554868	GCA_900026545	12673_6#37	15	Lees et al	Netherlands	Europe	191	Sensitive	Sensitive	Sensitive	Absent	Absent	-
2842STDY5643926	ERS367367	ERR461185	GCA_900023395	11860_6#89	15	Lees et al	Netherlands	Europe	191	Sensitive	Sensitive	Sensitive	Absent	Absent	-
4484STDY6632668	ERS1461718	ERR1947660	NA	21946_6#140	15	Lees et al	Netherlands	Europe	191	Sensitive	Sensitive	Sensitive	Absent	Absent	-
4484STDY6808927	ERS1698852	ERR2305316	NA	22695_3#275	15	Lees et al	Netherlands	Europe	191	Sensitive	Sensitive	Sensitive	Absent	Absent	-
2842STDY5644586	ERS368016	ERR461354	NA	11860_8#72	15	Lees et al	Netherlands	Europe	191	Sensitive	Sensitive	Sensitive	Absent	Absent	-
2842STDY5644412	ERS367846	ERR461732	GCA_900023645	11861_4#88	15	Lees et al	Netherlands	Europe	191	Sensitive	Sensitive	Sensitive	Absent	Absent	-
2842STDY5643890	ERS367331	ERR461150	NA	11860_6#54	15	Lees et al	Netherlands	Europe	191	Sensitive	Sensitive	Sensitive	Absent	Absent	-
4484STDY6808504	ERS1698433	ERR2305413	NA	22709_8#326	15	Lees et al	Netherlands	Europe	191	Sensitive	Sensitive	Sensitive	Absent	Absent	-
2842STDY5644488	ERS367919	ERR461257	GCA_900020715	11860_7#68	15	Lees et al	Netherlands	Europe	191	Sensitive	Sensitive	Sensitive	Absent	Absent	-
2842STDY5643822	ERS367264	ERR461085	GCA_900021615	11860_5#82	15	Lees et al	Netherlands	Europe	191	Sensitive	Sensitive	Sensitive	Absent	Absent	-
2842STDY5753097	ERS408882	ERR554843	NA	12673_6#12	15	Lees et al	Netherlands	Europe	191	Sensitive	Sensitive	Sensitive	Absent	Absent	-
2842STDY5644346	ERS367782	ERR461668	GCA_900036545	11861_4#22	15	Lees et al	Netherlands	Europe	191	Sensitive	Sensitive	Sensitive	Absent	Absent	-
2842STDY5881873	ERS515128	ERR716169	NA	14355_8#86	15	Lees et al	Netherlands	Europe	191	Sensitive	Sensitive	Sensitive	Absent	Absent	-
2842STDY5644360	ERS367796	ERR461682	NA	11861_4#37	15	Lees et al	Netherlands	Europe	191	Sensitive	Sensitive	Sensitive	Absent	Absent	-
4484STDY6808548	ERS1698477	ERR2305457	NA	22709_8#370	15	Lees et al	Netherlands	Europe	191	Sensitive	Sensitive	Sensitive	Absent	Absent	-
4484STDY6632542	ERS1460744	ERR1947536	NA	21946_6#16	15	Lees et al	Netherlands	Europe	191	Sensitive	Sensitive	Sensitive	Absent	Absent	-
2842STDY5644078	ERS367517	ERR461510	NA	11861_2#45	15	Lees et al	Netherlands	Europe	1589	Sensitive	Sensitive	Sensitive	Absent	Absent	-
2842STDY5644367	ERS367803	ERR461689	GCA_900027215	11861_4#45	15	Lees et al	Netherlands	Europe	191	Sensitive	Sensitive	Sensitive	Absent	Absent	-
2842STDY5643719	ERS367162	ERR460990	NA	11860_4#77	15	Lees et al	Netherlands	Europe	191	Sensitive	Sensitive	Sensitive	Absent	Absent	-
2842STDY5644017	ERS367457	ERR461455	NA	11861_1#81	15	Lees et al	Netherlands	Europe	191	Sensitive	Sensitive	Sensitive	Absent	Absent	-
2842STDY5644579	ERS368009	ERR461347	NA	11860_8#65	15	Lees et al	Netherlands	Europe	191	Sensitive	Sensitive	Sensitive	Absent	Absent	-
2842STDY5643724	ERS367167	ERR460994	GCA_900022165	11860_4#82	15	Lees et al	Netherlands	Europe	9102	Sensitive	Sensitive	Sensitive	Absent	Absent	-
2842STDY5644354	ERS367790	ERR461676	NA	11861_4#30	15	Lees et al	Netherlands	Europe	191	Sensitive	Sensitive	Sensitive	Absent	Absent	-
2842STDY5644024	ERS367464	ERR461461	NA	11861_1#87	15	Lees et al	Netherlands	Europe	191	Sensitive	Sensitive	Sensitive	Absent	Absent	-
2842STDY5643876	ERS367317	ERR461136	GCA_900024565	11860_6#39	15	Lees et al	Netherlands	Europe	191	Sensitive	Sensitive	Sensitive	Absent	Absent	-
2842STDY5644234	ERS367671	ERR461558	NA	11861_3#4	15	Lees et al	Netherlands	Europe	1589	Sensitive	Sensitive	Sensitive	Absent	Absent	-
2842STDY5643755	ERS367197	ERR461021	NA	11860_5#16	15	Lees et al	Netherlands	Europe	191	Sensitive	Sensitive	Sensitive	Absent	Absent	-
2842STDY5644270	ERS367707	ERR461594	GCA_900028225	11861_3#42	15	Lees et al	Netherlands	Europe	191	Sensitive	Sensitive	Sensitive	Absent	Absent	-
2842STDY5643916	ERS367357	ERR461175	NA	11860_6#79	15	Lees et al	Netherlands	Europe	191	Sensitive	Sensitive	Sensitive	Absent	Absent	-
2842STDY5644700	ERS368128	ERR461828	GCA_900047015	11861_5#91	15	Lees et al	Netherlands	Europe	191	Sensitive	Sensitive	Sensitive	Absent	Absent	-
2842STDY5644081	ERS367520	ERR461513	NA	11861_2#48	15	Lees et al	Netherlands	Europe	191	Sensitive	Sensitive	Sensitive	Absent	Absent	-
2842STDY5644265	ERS367702	ERR461589	GCA_900029445	11861_3#37	15	Lees et al	Netherlands	Europe	191	Sensitive	Sensitive	Sensitive	Absent	Absent	-
2842STDY5881888	ERS515143	ERR716184	GCA_900019635	14412_3#6	15	Lees et al	Netherlands	Europe	191	Sensitive	Sensitive	Sensitive	Absent	Present	-
2842STDY5644198	ERS367636	ERR461890	NA	11893_1#66	15	Lees et al	Netherlands	Europe	191	Sensitive	Sensitive	Sensitive	Absent	Absent	-
2842STDY5644420	ERS367853	ERR461739	NA	11861_4#95	15	Lees et al	Netherlands	Europe	191	Sensitive	Sensitive	Sensitive	Absent	Absent	-
2842STDY5644272	ERS367709	ERR461596	NA	11861_3#45	15	Lees et al	Netherlands	Europe	9102	Sensitive	Sensitive	Sensitive	Absent	Absent	-
2842STDY5643997	ERS367437	ERR461438	GCA_900023455	11861_1#63	15	Lees et al	Netherlands	Europe	191	Sensitive	Sensitive	Sensitive	Absent	Absent	-
2842STDY5753118	ERS408903	ERR554864	NA	12673_6#33	15	Lees et al	Netherlands	Europe	191	Sensitive	Sensitive	Sensitive	Absent	Absent	-
2842STDY5643894	ERS367335	ERR461153	NA	11860_6#57	15	Lees et al	Netherlands	Europe	3795	Sensitive	Sensitive	Sensitive	Absent	Absent	-
2842STDY5643909	ERS367350	ERR461168	NA	11860_6#72	15	Lees et al	Netherlands	Europe	191	Sensitive	Sensitive	Sensitive	Absent	Absent	-
2842STDY5644280	ERS367717	ERR461604	GCA_900024655	11861_3#53	15	Lees et al	Netherlands	Europe	191	Sensitive	Sensitive	Sensitive	Absent	Absent	-
2842STDY5644489	ERS367920	ERR461258	GCA_900018795	11860_7#69	15	Lees et al	Netherlands	Europe	191	Sensitive	Sensitive	Sensitive	Absent	Absent	-
2842STDY5643716	ERS367159	ERR460987	GCA_900027115	11860_4#74	15	Lees et al	Netherlands	Europe	191	Sensitive	Sensitive	Sensitive	Absent	Absent	-
4484STDY6808757	ERS1698683	ERR2305567	NA	23495_7#11	15	Lees et al	Netherlands	Europe	191	Sensitive	Sensitive	Sensitive	Absent	Absent	-
2842STDY5644617	ERS368046	ERR461746	GCA_900041725	11861_5#6	15	Lees et al	Netherlands	Europe	191	Sensitive	Sensitive	Sensitive	Absent	Absent	-
2842STDY5643833	ERS367275	ERR461096	NA	11860_5#93	15	Lees et al	Netherlands	Europe	191	Sensitive	Sensitive	Sensitive	Absent	Absent	-
2842STDY5643897	ERS367338	ERR461156	GCA_900023385	11860_6#60	15	Lees et al	Netherlands	Europe	191	Sensitive	Sensitive	Sensitive	Absent	Absent	-
2842STDY5644186	ERS367624	ERR450621	GCA_900031765	11822_8#50	15	Lees et al	Netherlands	Europe	191	Sensitive	Sensitive	Sensitive	Absent	Absent	-
2842STDY5644327	ERS367763	ERR461649	GCA_900030565	11861_4#2	15	Lees et al	Netherlands	Europe	1589	Sensitive	Sensitive	Sensitive	Absent	Absent	-
2842STDY5643874	ERS367315	ERR461134	GCA_900024555	11860_6#37	15	Lees et al	Netherlands	Europe	191	Sensitive	Sensitive	Sensitive	Absent	Absent	-
2842STDY5643761	ERS367203	ERR461027	NA	11860_5#22	15	Lees et al	Netherlands	Europe	191	Sensitive	Sensitive	Sensitive	Absent	Absent	-
2842STDY5644526	ERS367956	ERR461294	NA	11860_8#10	15	Lees et al	Netherlands	Europe	191	Sensitive	Sensitive	Sensitive	Absent	Absent	-
2842STDY5643864	ERS367305	ERR461124	GCA_900027535	11860_6#26	15	Lees et al	Netherlands	Europe	191	Sensitive	Sensitive	Sensitive	Absent	Absent	-
2842STDY5644159	ERS367597	ERR461854	GCA_900023755	11893_1#28	15	Lees et al	Netherlands	Europe	191	Sensitive	Sensitive	Sensitive	Absent	Absent	-
2842STDY5881875	ERS515130	ERR716171	NA	14355_8#88	15	Lees et al	Netherlands	Europe	191	Sensitive	Sensitive	Sensitive	Absent	Absent	-
2842STDY5644331	ERS367767	ERR461653	GCA_900035375	11861_4#6	15	Lees et al	Netherlands	Europe	191	Sensitive	Sensitive	Sensitive	Absent	Absent	-
2842STDY5643904	ERS367345	ERR461163	GCA_900020585	11860_6#67	15	Lees et al	Netherlands	Europe	191	Sensitive	Sensitive	Sensitive	Absent	Absent	-
2842STDY5643715	ERS367158	ERR460986	GCA_900032165	11860_4#73	15	Lees et al	Netherlands	Europe	191	Sensitive	Sensitive	Sensitive	Absent	Absent	-
2842STDY5643905	ERS367346	ERR461164	GCA_900022245	11860_6#68	15	Lees et al	Netherlands	Europe	191	Sensitive	Sensitive	Sensitive	Absent	Absent	-
2842STDY5644266	ERS367703	ERR461590	NA	11861_3#38	15	Lees et al	Netherlands	Europe	191	Sensitive	Sensitive	Sensitive	Absent	Absent	-
2842STDY5643777	ERS367219	ERR461041	GCA_900021445	11860_5#37	15	Lees et al	Netherlands	Europe	191	Sensitive	Sensitive	Sensitive	Absent	Absent	-
2842STDY5644093	ERS367532	ERR461525	NA	11861_2#60	15	Lees et al	Netherlands	Europe	191	Sensitive	Sensitive	Sensitive	Absent	Absent	-
2842STDY5644128	ERS367566	ERR502545	GCA_900030505	12273_1#89	15	Lees et al	Netherlands	Europe	191	Sensitive	Sensitive	Sensitive	Absent	Absent	-
2842STDY5753099	ERS408884	ERR554845	GCA_900020785	12673_6#14	15	Lees et al	Netherlands	Europe	191	Sensitive	Sensitive	Sensitive	Absent	Absent	-
2842STDY5643823	ERS367265	ERR461086	NA	11860_5#83	15	Lees et al	Netherlands	Europe	191	Sensitive	Sensitive	Sensitive	Absent	Absent	-
2842STDY5644229	ERS367666	ERR496943	NA	12216_4#94	15	Lees et al	Netherlands	Europe	191	Sensitive	Sensitive	Sensitive	Absent	Absent	-
4484STDY6808758	ERS1698684	ERR2305568	NA	23495_7#12	15	Lees et al	Netherlands	Europe	191	Sensitive	Sensitive	Sensitive	Absent	Absent	-
2842STDY5643745	ERS367187	ERR461011	GCA_900032785	11860_5#5	15	Lees et al	Netherlands	Europe	191	Sensitive	Sensitive	Sensitive	Absent	Absent	-
2842STDY5644636	ERS368065	ERR461765	NA	11861_5#26	15	Lees et al	Netherlands	Europe	191	Sensitive	Sensitive	Sensitive	Absent	Absent	-
2842STDY5644653	ERS368082	ERR461782	GCA_900021575	11861_5#45	15	Lees et al	Netherlands	Europe	4319	Sensitive	Sensitive	Sensitive	Absent	Absent	-
2842STDY5644685	ERS368113	ERR461813	GCA_900032775	11861_5#76	15	Lees et al	Netherlands	Europe	191	Sensitive	Sensitive	Sensitive	Absent	Absent	-
2842STDY5644045	ERS367484	ERR461478	GCA_900020615	11861_2#11	15	Lees et al	Netherlands	Europe	191	Sensitive	Sensitive	Sensitive	Absent	Absent	-
2842STDY5643817	ERS367259	ERR461080	GCA_900020055	11860_5#77	15	Lees et al	Netherlands	Europe	191	Sensitive	Sensitive	Sensitive	Absent	Absent	-
2842STDY5644544	ERS367974	ERR461312	GCA_900021205	11860_8#28	15	Lees et al	Netherlands	Europe	191	Sensitive	Sensitive	Sensitive	Absent	Absent	-
4484STDY6808725	ERS1698652	ERR2305211	NA	22695_3#170	15	Lees et al	Netherlands	Europe	191	Sensitive	Sensitive	Sensitive	Absent	Absent	-
2842STDY5644134	ERS367572	ERR461831	GCA_900020135	11893_1#3	15	Lees et al	Netherlands	Europe	191	Sensitive	Sensitive	Sensitive	Absent	Absent	-
2842STDY5643900	ERS367341	ERR461159	NA	11860_6#63	15	Lees et al	Netherlands	Europe	191	Sensitive	Sensitive	Sensitive	Absent	Absent	-
2842STDY5644084	ERS367523	ERR461516	GCA_900028775	11861_2#51	15	Lees et al	Netherlands	Europe	191	Sensitive	Sensitive	Sensitive	Absent	Absent	-
2842STDY5643702	ERS367145	ERR460974	GCA_900046605	11860_4#60	15	Lees et al	Netherlands	Europe	191	Sensitive	Sensitive	Sensitive	Absent	Absent	-
2842STDY5643869	ERS367310	ERR461129	NA	11860_6#32	15	Lees et al	Netherlands	Europe	191	Sensitive	Sensitive	Sensitive	Absent	Absent	-
2842STDY5644675	ERS368103	ERR461803	GCA_900023885	11861_5#66	15	Lees et al	Netherlands	Europe	191	Sensitive	Sensitive	Sensitive	Absent	Absent	-
2842STDY5643740	ERS367183	ERR461007	NA	11860_5#1	15	Lees et al	Netherlands	Europe	191	Sensitive	Sensitive	Sensitive	Absent	Absent	-
2842STDY5644144	ERS367582	ERR461841	GCA_900021655	11893_1#14	15	Lees et al	Netherlands	Europe	191	Sensitive	Sensitive	Sensitive	Absent	Absent	-
2842STDY5643796	ERS367238	ERR461060	GCA_900025815	11860_5#57	15	Lees et al	Netherlands	Europe	191	Sensitive	Sensitive	Sensitive	Absent	Absent	-
2842STDY5644243	ERS367680	ERR461567	GCA_900021695	11861_3#14	15	Lees et al	Netherlands	Europe	191	Sensitive	Sensitive	Sensitive	Absent	Absent	-
2842STDY5644099	ERS367538	ERR461531	GCA_900017915	11861_2#66	15	Lees et al	Netherlands	Europe	191	Sensitive	Sensitive	Sensitive	Absent	Absent	-
2842STDY5643672	ERS367115	ERR460944	NA	11860_4#28	15	Lees et al	Netherlands	Europe	191	Sensitive	Sensitive	Sensitive	Absent	Absent	-
2842STDY5644603	ERS368033	ERR461371	GCA_900033425	11860_8#89	15	Lees et al	Netherlands	Europe	191	Sensitive	Sensitive	Sensitive	Absent	Absent	-
2842STDY5644344	ERS367780	ERR461666	NA	11861_4#20	15	Lees et al	Netherlands	Europe	191	Sensitive	Sensitive	Sensitive	Absent	Absent	-
2842STDY5644259	ERS367696	ERR461583	GCA_900031795	11861_3#30	15	Lees et al	Netherlands	Europe	191	Sensitive	Sensitive	Sensitive	Absent	Absent	-
2842STDY5753102	ERS408887	ERR554848	NA	12673_6#17	15	Lees et al	Netherlands	Europe	1589	Sensitive	Sensitive	NA	Absent	Absent	-
2842STDY5643996	ERS367436	ERR461437	GCA_900020105	11861_1#62	15	Lees et al	Netherlands	Europe	191	Sensitive	Sensitive	Sensitive	Absent	Absent	-
2842STDY5753113	ERS408898	ERR554859	GCA_900024665	12673_6#28	15	Lees et al	Netherlands	Europe	191	Sensitive	Sensitive	Sensitive	Absent	Absent	-
2842STDY5644285	ERS367722	ERR461609	GCA_900023805	11861_3#58	15	Lees et al	Netherlands	Europe	9102	Sensitive	Sensitive	Sensitive	Absent	Absent	-
2842STDY5644369	ERS367805	ERR461691	GCA_900024615	11861_4#47	15	Lees et al	Netherlands	Europe	191	Sensitive	Sensitive	Sensitive	Absent	Absent	-
2842STDY5644076	ERS367515	ERR461508	NA	11861_2#42	15	Lees et al	Netherlands	Europe	191	Sensitive	Sensitive	Sensitive	Absent	Absent	-
2842STDY5644315	ERS367752	ERR461638	NA	11861_3#87	15	Lees et al	Netherlands	Europe	191	Sensitive	Sensitive	Sensitive	Absent	Absent	-
4484STDY6808621	ERS1698549	ERR2305108	NA	22695_3#67	15	Lees et al	Netherlands	Europe	191	Sensitive	Sensitive	Sensitive	Absent	Absent	-
2842STDY5643839	ERS367280	ERR461101	NA	11860_6#2	15	Lees et al	Netherlands	Europe	191	Sensitive	Sensitive	Sensitive	Absent	Absent	-
2842STDY5644127	ERS367565	ERR502544	GCA_900031135	12273_1#88	15	Lees et al	Netherlands	Europe	191	Sensitive	Sensitive	Sensitive	Absent	Absent	-
2842STDY5644113	ERS367552	ERR461544	NA	11861_2#79	15	Lees et al	Netherlands	Europe	191	Sensitive	Sensitive	Sensitive	Absent	Absent	-
2842STDY5881922	ERS515176	ERR716216	NA	14412_3#39	15	Lees et al	Netherlands	Europe	191	Sensitive	Sensitive	Sensitive	Absent	Absent	-
2842STDY5644271	ERS367708	ERR461595	GCA_900032215	11861_3#44	15	Lees et al	Netherlands	Europe	191	Sensitive	Sensitive	Sensitive	Absent	Absent	-
2842STDY5881824	ERS515079	ERR716120	NA	14355_8#37	15	Lees et al	Netherlands	Europe	191	Sensitive	Sensitive	Sensitive	Absent	Absent	-
2842STDY5644633	ERS368062	ERR461762	NA	11861_5#23	15	Lees et al	Netherlands	Europe	191	Sensitive	Sensitive	Sensitive	Absent	Absent	-
2842STDY5644673	ERS368101	ERR461801	NA	11861_5#64	15	Lees et al	Netherlands	Europe	191	Sensitive	Sensitive	Sensitive	Absent	Absent	-
2842STDY5644339	ERS367775	ERR461661	GCA_900030585	11861_4#15	15	Lees et al	Netherlands	Europe	2469	Sensitive	Sensitive	Sensitive	Absent	Absent	-
2842STDY5644037	ERS367476	ERR461470	GCA_900020125	11861_2#2	15	Lees et al	Netherlands	Europe	191	Sensitive	Sensitive	Sensitive	Absent	Absent	-
2842STDY5644192	ERS367630	ERR461884	GCA_900028205	11893_1#60	15	Lees et al	Netherlands	Europe	191	Sensitive	Sensitive	Sensitive	Absent	Absent	-
2842STDY5644594	ERS368024	ERR461362	GCA_900022145	11860_8#80	15	Lees et al	Netherlands	Europe	191	Sensitive	Sensitive	Sensitive	Absent	Absent	-
2842STDY5644537	ERS367967	ERR461305	GCA_900021545	11860_8#21	15	Lees et al	Netherlands	Europe	191	Sensitive	Sensitive	Sensitive	Absent	Absent	-
2842STDY5644532	ERS367962	ERR461300	NA	11860_8#16	15	Lees et al	Netherlands	Europe	191	Sensitive	Sensitive	Sensitive	Absent	Absent	-
2842STDY5644416	ERS367849	ERR461735	GCA_900020655	11861_4#91	15	Lees et al	Netherlands	Europe	191	Sensitive	Sensitive	Sensitive	Absent	Absent	-
2842STDY5644096	ERS367535	ERR461528	NA	11861_2#63	15	Lees et al	Netherlands	Europe	191	Sensitive	Sensitive	Sensitive	Absent	Absent	-
2842STDY5644519	ERS367949	ERR461287	GCA_900021215	11860_8#2	15	Lees et al	Netherlands	Europe	191	Sensitive	Sensitive	Sensitive	Absent	Absent	-
2842STDY5643934	ERS367374	ERR461192	GCA_900046715	11860_6#96	15	Lees et al	Netherlands	Europe	191	Sensitive	Sensitive	Sensitive	Absent	Absent	-
2842STDY5881906	ERS515161	ERR716202	GCA_900024695	14412_3#24	16	Lees et al	Netherlands	Europe	72	Sensitive	Sensitive	Sensitive	Absent	Absent	-
2842STDY5644622	ERS368051	ERR461751	GCA_900018405	11861_5#12	16	Lees et al	Netherlands	Europe	66	Sensitive	Sensitive	Sensitive	Absent	Absent	-
2842STDY5644373	ERS367809	ERR461695	GCA_900026515	11861_4#51	16	Lees et al	Netherlands	Europe	72	Sensitive	Sensitive	Sensitive	Absent	Absent	-
2842STDY5644499	ERS367930	ERR461268	GCA_900019425	11860_7#79	16	Lees et al	Netherlands	Europe	66	Sensitive	Sensitive	Sensitive	Absent	Absent	-
2842STDY5644204	ERS367642	ERR461895	GCA_900030545	11893_1#71	16	Lees et al	Netherlands	Europe	66	Sensitive	Sensitive	Sensitive	Absent	Absent	-
2842STDY5644026	ERS367466	ERR461462	NA	11861_1#89	16	Lees et al	Netherlands	Europe	70	Sensitive	Sensitive	Sensitive	Absent	Absent	-
4484STDY6632520	ERS1460722	ERR1947515	NA	21903_8#361	16	Lees et al	Netherlands	Europe	66	Sensitive	Sensitive	Sensitive	Absent	Absent	-
2842STDY5881861	ERS515116	ERR716157	GCA_900024685	14355_8#74	16	Lees et al	Netherlands	Europe	79	Sensitive	Sensitive	Sensitive	Absent	Absent	-
2842STDY5644064	ERS367503	ERR461497	GCA_900023515	11861_2#30	16	Lees et al	Netherlands	Europe	66	Sensitive	Sensitive	Sensitive	Absent	Absent	-
4484STDY6632589	ERS1460791	ERR1947583	NA	21946_6#63	16	Lees et al	Netherlands	Europe	517	Resistant	Resistant	Sensitive	Absent	Absent	-
2842STDY5644669	ERS368097	ERR461797	GCA_900022745	11861_5#60	16	Lees et al	Netherlands	Europe	67	Sensitive	Sensitive	Sensitive	Absent	Absent	-
4484STDY6632323	ERS1460529	ERR1947323	NA	21903_8#169	16	Lees et al	Netherlands	Europe	66	Sensitive	Sensitive	Sensitive	Absent	Absent	-
2842STDY5644301	ERS367738	ERR461625	NA	11861_3#74	16	Lees et al	Netherlands	Europe	66	Sensitive	Sensitive	Sensitive	Absent	Absent	-
2842STDY5644654	ERS368083	ERR461783	GCA_900019465	11861_5#46	16	Lees et al	Netherlands	Europe	66	Sensitive	Sensitive	Sensitive	Absent	Absent	-
2842STDY5644587	ERS368017	ERR461355	GCA_900017815	11860_8#73	16	Lees et al	Netherlands	Europe	66	Sensitive	Sensitive	Sensitive	Absent	Absent	-
2842STDY5643773	ERS367215	ERR461038	NA	11860_5#34	16	Lees et al	Netherlands	Europe	66	Sensitive	Sensitive	Sensitive	Absent	Absent	-
2842STDY5644286	ERS367723	ERR461610	NA	11861_3#59	16	Lees et al	Netherlands	Europe	66	Sensitive	Sensitive	Sensitive	Absent	Absent	-
4484STDY6809051	ERS1698969	ERR2305343	NA	22695_3#302	16	Lees et al	Netherlands	Europe	66	Sensitive	Sensitive	Sensitive	Absent	Absent	-
4484STDY6632254	ERS1460460	ERR1947255	NA	21903_8#101	16	Lees et al	Netherlands	Europe	66	Sensitive	Sensitive	Sensitive	Absent	Absent	-
4484STDY6632030	ERS1460240	ERR1947766	NA	21946_6#246	16	Lees et al	Netherlands	Europe	66	Sensitive	Sensitive	Sensitive	Absent	Absent	-
2842STDY5643782	ERS367224	ERR461046	GCA_900025105	11860_5#42	16	Lees et al	Netherlands	Europe	72	Sensitive	Sensitive	Sensitive	Absent	Absent	-
4484STDY6632511	ERS1460714	ERR1947507	NA	21903_8#353	16	Lees et al	Netherlands	Europe	517	Resistant	Resistant	Sensitive	Absent	Absent	-
2842STDY5644551	ERS367981	ERR461319	GCA_900020555	11860_8#36	16	Lees et al	Netherlands	Europe	79~	Sensitive	Sensitive	Sensitive	Absent	Absent	-
2842STDY5644224	ERS367661	ERR496938	GCA_900031785	12216_4#89	16	Lees et al	Netherlands	Europe	517	Resistant	Resistant	Sensitive	Absent	Absent	-
4484STDY6632449	ERS1460652	ERR1947445	NA	21903_8#291	16	Lees et al	Netherlands	Europe	72	Sensitive	Sensitive	Sensitive	Absent	Absent	-
4484STDY6632196	ERS1460403	ERR1947198	NA	21903_8#44	16	Lees et al	Netherlands	Europe	79	Sensitive	Sensitive	Sensitive	Absent	Absent	-
4484STDY6632142	ERS1460349	ERR1947874	NA	21946_6#354	16	Lees et al	Netherlands	Europe	72	Sensitive	Sensitive	Sensitive	Absent	Absent	-
2842STDY5644313	ERS367750	ERR461636	NA	11861_3#85	16	Lees et al	Netherlands	Europe	72	Sensitive	Sensitive	Sensitive	Absent	Absent	-
4484STDY6631986	ERS1460196	ERR1947722	NA	21946_6#202	16	Lees et al	Netherlands	Europe	66	Sensitive	Sensitive	Sensitive	Absent	Absent	-
2842STDY5644645	ERS368074	ERR461774	GCA_900018855	11861_5#36	16	Lees et al	Netherlands	Europe	79	Sensitive	Sensitive	Sensitive	Absent	Absent	-
2842STDY5644075	ERS367514	ERR461507	NA	11861_2#41	16	Lees et al	Netherlands	Europe	72	Sensitive	Sensitive	Sensitive	Absent	Absent	-
4484STDY6808570	ERS1698498	ERR2305057	NA	22695_3#16	16	Lees et al	Netherlands	Europe	66	Sensitive	Sensitive	Sensitive	Absent	Absent	-
2842STDY5644066	ERS367505	ERR461499	GCA_900026485	11861_2#33	16	Lees et al	Netherlands	Europe	66	Sensitive	Sensitive	Sensitive	Absent	Absent	-
4484STDY6808515	ERS1698459	ERR2305424	NA	22709_8#337	16	Lees et al	Netherlands	Europe	66	Sensitive	Sensitive	Sensitive	Absent	Absent	-
2842STDY5881822	ERS515077	ERR716118	NA	14355_8#35	16	Lees et al	Netherlands	Europe	79	Sensitive	Sensitive	Sensitive	Absent	Absent	-
2842STDY5644191	ERS367629	ERR461883	GCA_900024035	11893_1#59	16	Lees et al	Netherlands	Europe	66	Sensitive	Sensitive	Sensitive	Absent	Absent	-
4484STDY6632416	ERS1460621	ERR1947414	NA	21903_8#260	16	Lees et al	Netherlands	Europe	66	Sensitive	Sensitive	Sensitive	Absent	Absent	-
2842STDY5881838	ERS515093	ERR716134	GCA_900030055	14355_8#51	16	Lees et al	Netherlands	Europe	79	Sensitive	Sensitive	Sensitive	Absent	Absent	-
4484STDY6632371	ERS1460576	ERR1947369	NA	21903_8#215	16	Lees et al	Netherlands	Europe	517	Resistant	Resistant	Sensitive	Absent	Absent	-
2842STDY5644014	ERS367454	ERR461454	NA	11861_1#79	16	Lees et al	Netherlands	Europe	66	Sensitive	Sensitive	Sensitive	Absent	Absent	-
2842STDY5644425	ERS367858	ERR461196	NA	11860_7#4	16	Lees et al	Netherlands	Europe	72	Sensitive	Sensitive	Sensitive	Absent	Absent	-
2842STDY5644492	ERS367923	ERR461261	NA	11860_7#72	16	Lees et al	Netherlands	Europe	79	Sensitive	Sensitive	Sensitive	Absent	Absent	-
2842STDY5643968	ERS367408	ERR461410	GCA_900027555	11861_1#34	16	Lees et al	Netherlands	Europe	72	Sensitive	Sensitive	Sensitive	Absent	Absent	-
2842STDY5644377	ERS367813	ERR461699	GCA_900018525	11861_4#55	16	Lees et al	Netherlands	Europe	79	Sensitive	Sensitive	Sensitive	Absent	Absent	-
4484STDY6632005	ERS1460215	ERR1947741	NA	21946_6#221	16	Lees et al	Netherlands	Europe	67	Sensitive	Sensitive	Sensitive	Absent	Absent	-
2842STDY5644497	ERS367928	ERR461266	GCA_900027515	11860_7#77	16	Lees et al	Netherlands	Europe	8000	Sensitive	Sensitive	Sensitive	Absent	Absent	-
2842STDY5643730	ERS367173	ERR460998	GCA_900022185	11860_4#87	16	Lees et al	Netherlands	Europe	66	Sensitive	Sensitive	Sensitive	Absent	Absent	-
2842STDY5644309	ERS367746	ERR461632	GCA_900041755	11861_3#81	16	Lees et al	Netherlands	Europe	67	Sensitive	Sensitive	Sensitive	Absent	Absent	-
2842STDY5643794	ERS367236	ERR461058	GCA_900031735	11860_5#55	16	Lees et al	Netherlands	Europe	66	Sensitive	Sensitive	Sensitive	Absent	Absent	-
2842STDY5644245	ERS367682	ERR461569	NA	11861_3#16	16	Lees et al	Netherlands	Europe	66	Sensitive	Sensitive	Sensitive	Absent	Absent	-
4484STDY6632041	ERS1460250	ERR1947776	NA	21946_6#256	16	Lees et al	Netherlands	Europe	517	Resistant	Resistant	Sensitive	Absent	Absent	-
4484STDY6632419	ERS1460624	ERR1947417	NA	21903_8#263	16	Lees et al	Netherlands	Europe	66	Sensitive	Sensitive	Sensitive	Absent	Absent	-
4484STDY6632134	ERS1460342	ERR1947867	NA	21946_6#347	16	Lees et al	Netherlands	Europe	517	Resistant	Resistant	Sensitive	Absent	Absent	-
4484STDY6808962	ERS1698886	ERR2305485	NA	22984_8#23	16	Lees et al	Netherlands	Europe	72	Sensitive	Sensitive	Sensitive	Absent	Absent	-
2842STDY5644550	ERS367980	ERR461318	NA	11860_8#35	16	Lees et al	Netherlands	Europe	72	Sensitive	Sensitive	Sensitive	Absent	Absent	-
2842STDY5881947	ERS515219	ERR716241	NA	14412_3#64	16	Lees et al	Netherlands	Europe	72	Sensitive	Sensitive	Sensitive	Absent	Absent	-
4484STDY6808580	ERS1698508	ERR2305067	NA	22695_3#26	16	Lees et al	Netherlands	Europe	66	Sensitive	Sensitive	Sensitive	Absent	Absent	-
2842STDY5644129	ERS367567	ERR502546	GCA_900018515	12273_1#90	16	Lees et al	Netherlands	Europe	66	Sensitive	Sensitive	Sensitive	Absent	Absent	-
2842STDY5643787	ERS367229	ERR461051	GCA_900046635	11860_5#48	16	Lees et al	Netherlands	Europe	72	Sensitive	Sensitive	Sensitive	Absent	Absent	-
2842STDY5644328	ERS367764	ERR461650	GCA_900022875	11861_4#3	16	Lees et al	Netherlands	Europe	72	Sensitive	Sensitive	Sensitive	Absent	Absent	-
2842STDY5644240	ERS367677	ERR461564	GCA_900030005	11861_3#11	16	Lees et al	Netherlands	Europe	66	Sensitive	Sensitive	Sensitive	Absent	Absent	-
2842STDY5753127	ERS408912	ERR554873	NA	12673_6#42	16	Lees et al	Netherlands	Europe	66~	Sensitive	Sensitive	Sensitive	Absent	Absent	-
2842STDY5753108	ERS408893	ERR554854	GCA_900026525	12673_6#23	16	Lees et al	Netherlands	Europe	66	Sensitive	Sensitive	Sensitive	Absent	Absent	-
4484STDY6808683	ERS1698610	ERR2305169	NA	22695_3#128	17	Lees et al	Netherlands	Europe	2062	Resistant	Resistant	Resistant	Absent	Absent	-
4484STDY6808749	ERS1698675	ERR2305559	NA	23495_7#3	17	Lees et al	Netherlands	Europe	2062	Resistant	Resistant	Resistant	Absent	Absent	-
4484STDY6808720	ERS1698647	ERR2305206	NA	22695_3#165	17	Lees et al	Netherlands	Europe	2062	Resistant	Resistant	Resistant	Absent	Absent	-
4484STDY6808813	ERS1698739	ERR2305623	NA	23495_7#67	17	Lees et al	Netherlands	Europe	2062	Resistant	Resistant	Resistant	Absent	Absent	-
2842STDY5643883	ERS367324	ERR461143	GCA_900023365	11860_6#47	18	Lees et al	Netherlands	Europe	9	Sensitive	Sensitive	Sensitive	Present	Absent	-
2842STDY5644063	ERS367502	ERR461496	NA	11861_2#29	18	Lees et al	Netherlands	Europe	423~	Sensitive	Sensitive	Sensitive	Absent	Absent	-
2842STDY5644588	ERS368018	ERR461356	GCA_900017805	11860_8#74	18	Lees et al	Netherlands	Europe	1201	Sensitive	Sensitive	Sensitive	Absent	Absent	-
2842STDY5644534	ERS367964	ERR461302	GCA_900025075	11860_8#18	18	Lees et al	Netherlands	Europe	9300	Sensitive	Sensitive	Sensitive	Absent	Absent	-
4484STDY6632141	ERS1460348	ERR1947873	NA	21946_6#353	18	Lees et al	Netherlands	Europe	1201	Sensitive	Sensitive	Sensitive	Absent	Absent	-
2842STDY5644500	ERS367931	ERR461269	GCA_900027095	11860_7#80	18	Lees et al	Netherlands	Europe	9	Sensitive	Sensitive	Sensitive	Present	Absent	-
2842STDY5643800	ERS367242	ERR461064	NA	11860_5#61	18	Lees et al	Netherlands	Europe	1201	Sensitive	Sensitive	Sensitive	Absent	Absent	-
2842STDY5643708	ERS367151	ERR460980	NA	11860_4#66	18	Lees et al	Netherlands	Europe	43	Sensitive	Resistant	Sensitive	Absent	Absent	-
4484STDY6632312	ERS1460518	ERR1947312	NA	21903_8#158	18	Lees et al	Netherlands	Europe	423	Resistant	Resistant	Sensitive	Absent	Present	-
4484STDY6808512	ERS1698456	ERR2305421	NA	22709_8#334	18	Lees et al	Netherlands	Europe	1201	Sensitive	Sensitive	Sensitive	Absent	Absent	-
2842STDY5644110	ERS367549	ERR461541	GCA_900018955	11861_2#76	18	Lees et al	Netherlands	Europe	9	Sensitive	Sensitive	Sensitive	Present	Absent	-
2842STDY5643674	ERS367117	ERR460946	NA	11860_4#30	18	Lees et al	Netherlands	Europe	9	Sensitive	Sensitive	Sensitive	Present	Absent	-
2842STDY5881936	ERS515197	ERR716230	GCA_900019645	14412_3#53	18	Lees et al	Netherlands	Europe	15	Sensitive	Sensitive	Sensitive	Absent	Present	-
2842STDY5643693	ERS367136	ERR460965	NA	11860_4#51	18	Lees et al	Netherlands	Europe	9	Sensitive	Sensitive	Sensitive	Present	Absent	-
2842STDY5881919	ERS515173	ERR716213	GCA_900024715	14412_3#36	18	Lees et al	Netherlands	Europe	9	Sensitive	Sensitive	Sensitive	Present	Absent	-
2842STDY5644539	ERS367969	ERR461307	GCA_900016885	11860_8#23	18	Lees et al	Netherlands	Europe	15	Sensitive	Resistant	Sensitive	Absent	Absent	-
2842STDY5644677	ERS368105	ERR461805	GCA_900022755	11861_5#68	18	Lees et al	Netherlands	Europe	9	Sensitive	Sensitive	Sensitive	Present	Absent	-
4484STDY6631954	ERS1460164	ERR1947144	NA	21903_6#174	18	Lees et al	Netherlands	Europe	9	Sensitive	Sensitive	Sensitive	Present	Absent	-
2842STDY5644290	ERS367727	ERR461614	NA	11861_3#63	18	Lees et al	Netherlands	Europe	9	Sensitive	Sensitive	Sensitive	Present	Absent	-
2842STDY5644649	ERS368078	ERR461778	NA	11861_5#40	18	Lees et al	Netherlands	Europe	15	Sensitive	Sensitive	Sensitive	Absent	Absent	-
4484STDY6631982	ERS1460192	ERR1947718	NA	21946_6#198	18	Lees et al	Netherlands	Europe	1201	Sensitive	Sensitive	Sensitive	Absent	Absent	-
2842STDY5644419	ERS367852	ERR461738	NA	11861_4#94	18	Lees et al	Netherlands	Europe	15~	Sensitive	Sensitive	Sensitive	Absent	Absent	-
2842STDY5644475	ERS367906	ERR461244	GCA_900038615	11860_7#55	18	Lees et al	Netherlands	Europe	9	Sensitive	Sensitive	Sensitive	Present	Absent	-
4484STDY6632691	ERS1461740	ERR1947681	NA	21946_6#161	18	Lees et al	Netherlands	Europe	9	Sensitive	Sensitive	Sensitive	Present	Absent	-
4484STDY6808630	ERS1698558	ERR2305117	NA	22695_3#76	18	Lees et al	Netherlands	Europe	423	Sensitive	Sensitive	Sensitive	Absent	Absent	-
2842STDY5643662	ERS367105	ERR460934	GCA_900021385	11860_4#18	18	Lees et al	Netherlands	Europe	9	Sensitive	Sensitive	Sensitive	Present	Absent	-
2842STDY5644604	ERS368034	ERR461372	GCA_900037415	11860_8#90	18	Lees et al	Netherlands	Europe	9	Sensitive	Sensitive	Sensitive	Present	Absent	-
4484STDY6632491	ERS1460694	ERR1947487	NA	21903_8#333	18	Lees et al	Netherlands	Europe	3011	Sensitive	Sensitive	Sensitive	Absent	Absent	-
2842STDY5644408	ERS367842	ERR461728	NA	11861_4#84	18	Lees et al	Netherlands	Europe	9	Sensitive	Sensitive	Sensitive	Present	Absent	-
2842STDY5643801	ERS367243	ERR461065	GCA_900034015	11860_5#62	18	Lees et al	Netherlands	Europe	1201	Sensitive	Sensitive	Sensitive	Absent	Absent	-
2842STDY5644582	ERS368012	ERR461350	NA	11860_8#68	18	Lees et al	Netherlands	Europe	9	Sensitive	Sensitive	Sensitive	Present	Absent	-
4484STDY6632534	ERS1460736	ERR1947528	NA	21946_6#8	18	Lees et al	Netherlands	Europe	409	Sensitive	Sensitive	Sensitive	Absent	Absent	-
2842STDY5644411	ERS367845	ERR461731	NA	11861_4#87	18	Lees et al	Netherlands	Europe	1201	Sensitive	Sensitive	Sensitive	Absent	Absent	-
2842STDY5643830	ERS367272	ERR461093	GCA_900046655	11860_5#90	18	Lees et al	Netherlands	Europe	9	Sensitive	Sensitive	Sensitive	Present	Absent	-
2842STDY5643846	ERS367287	ERR461107	GCA_900022215	11860_6#9	18	Lees et al	Netherlands	Europe	9	Sensitive	Sensitive	Sensitive	Present	Absent	-
2842STDY5644193	ERS367631	ERR461885	GCA_900024025	11893_1#61	18	Lees et al	Netherlands	Europe	9	Sensitive	Sensitive	Sensitive	Present	Absent	-
4484STDY6632311	ERS1460517	ERR1947311	NA	21903_8#157	18	Lees et al	Netherlands	Europe	423~	Sensitive	Sensitive	Sensitive	Absent	Absent	-
2842STDY5644679	ERS368107	ERR461807	GCA_900031085	11861_5#70	18	Lees et al	Netherlands	Europe	9	Sensitive	Sensitive	Sensitive	Absent	Absent	-
4484STDY6632690	ERS1461739	ERR1947680	NA	21946_6#160	18	Lees et al	Netherlands	Europe	9	Sensitive	Sensitive	Sensitive	Present	Absent	-
2842STDY5643971	ERS367411	ERR461412	GCA_900036185	11861_1#36	18	Lees et al	Netherlands	Europe	9	Sensitive	Sensitive	Sensitive	Present	Absent	-
2842STDY5644655	ERS368084	ERR461784	NA	11861_5#47	18	Lees et al	Netherlands	Europe	423~	Sensitive	Sensitive	Sensitive	Absent	Absent	-
2842STDY5643701	ERS367144	ERR460973	GCA_900016955	11860_4#59	18	Lees et al	Netherlands	Europe	9	Sensitive	Sensitive	Sensitive	Present	Absent	-
2842STDY5881841	ERS515096	ERR716137	NA	14355_8#54	18	Lees et al	Netherlands	Europe	1006~	Sensitive	Sensitive	Sensitive	Absent	Absent	-
4484STDY6631964	ERS1460174	ERR1947154	NA	21903_6#184	18	Lees et al	Netherlands	Europe	1201	Sensitive	Sensitive	Sensitive	Absent	Absent	-
4484STDY6632034	ERS1460244	ERR1947770	NA	21946_6#250	18	Lees et al	Netherlands	Europe	1201	Sensitive	Sensitive	Sensitive	Absent	Absent	-
2842STDY5644072	ERS367511	ERR461504	NA	11861_2#38	18	Lees et al	Netherlands	Europe	8419	Sensitive	Sensitive	Sensitive	Absent	Absent	-
2842STDY5643889	ERS367330	ERR461149	GCA_900029395	11860_6#53	18	Lees et al	Netherlands	Europe	1201	Sensitive	Sensitive	Sensitive	Absent	Absent	-
2842STDY5644662	ERS368090	ERR461790	GCA_900021585	11861_5#53	18	Lees et al	Netherlands	Europe	4826	Sensitive	Sensitive	Sensitive	Absent	Absent	-
2842STDY5644012	ERS367452	ERR461453	GCA_900025825	11861_1#78	19	Lees et al	Netherlands	Europe	433	Sensitive	Sensitive	Sensitive	Absent	Absent	-
4484STDY6632130	ERS1460338	ERR1947863	NA	21946_6#343	19	Lees et al	Netherlands	Europe	433	Sensitive	Sensitive	Sensitive	Absent	Absent	-
2842STDY5644169	ERS367607	ERR461863	GCA_900025205	11893_1#38	19	Lees et al	Netherlands	Europe	433	Sensitive	Sensitive	Sensitive	Absent	Absent	-
2842STDY5753105	ERS408890	ERR554851	NA	12673_6#20	19	Lees et al	Netherlands	Europe	433	Sensitive	Sensitive	Sensitive	Absent	Absent	-
2842STDY5644310	ERS367747	ERR461633	GCA_900042375	11861_3#82	19	Lees et al	Netherlands	Europe	433	Sensitive	Sensitive	Sensitive	Absent	Absent	-
4484STDY6632259	ERS1460465	ERR1947260	NA	21903_8#106	19	Lees et al	Netherlands	Europe	433	Sensitive	Sensitive	Sensitive	Absent	Absent	-
2842STDY5644337	ERS367773	ERR461659	GCA_900032235	11861_4#13	19	Lees et al	Netherlands	Europe	433	Sensitive	Sensitive	Sensitive	Absent	Absent	-
2842STDY5643862	ERS367303	ERR461122	GCA_900022235	11860_6#24	19	Lees et al	Netherlands	Europe	433	Sensitive	Sensitive	Sensitive	Absent	Absent	-
4484STDY6808829	ERS1698755	ERR2305638	NA	23495_7#82	19	Lees et al	Netherlands	Europe	433	Sensitive	Sensitive	Sensitive	Absent	Absent	-
2842STDY5644083	ERS367522	ERR461515	NA	11861_2#50	19	Lees et al	Netherlands	Europe	819	Sensitive	Sensitive	Sensitive	Absent	Absent	-
2842STDY5644179	ERS367617	ERR461873	NA	11893_1#49	19	Lees et al	Netherlands	Europe	433	Sensitive	Sensitive	Sensitive	Absent	Absent	-
4484STDY6632320	ERS1460526	ERR1947320	NA	21903_8#166	19	Lees et al	Netherlands	Europe	433	Sensitive	Sensitive	Sensitive	Absent	Absent	-
4484STDY6809061	ERS1698984	ERR2305353	NA	22695_3#312	19	Lees et al	Netherlands	Europe	433	Sensitive	Sensitive	Sensitive	Absent	Absent	-
2842STDY5643684	ERS367127	ERR460956	GCA_900017345	11860_4#41	19	Lees et al	Netherlands	Europe	433	Sensitive	Sensitive	Sensitive	Absent	Absent	-
4484STDY6808673	ERS1698600	ERR2305159	NA	22695_3#118	19	Lees et al	Netherlands	Europe	433	Sensitive	Sensitive	Sensitive	Absent	Absent	-
4484STDY6632285	ERS1460491	ERR1947285	NA	21903_8#131	19	Lees et al	Netherlands	Europe	433	Sensitive	Sensitive	Sensitive	Absent	Absent	-
2842STDY5643666	ERS367109	ERR460938	GCA_900018435	11860_4#22	19	Lees et al	Netherlands	Europe	433	Sensitive	Sensitive	Sensitive	Absent	Absent	-
4484STDY6631955	ERS1460165	ERR1947145	NA	21903_6#175	19	Lees et al	Netherlands	Europe	433	Sensitive	Sensitive	Sensitive	Absent	Absent	-
2842STDY5643998	ERS367438	ERR461439	NA	11861_1#64	19	Lees et al	Netherlands	Europe	433	Sensitive	Sensitive	Sensitive	Absent	Absent	-
4484STDY6632129	ERS1460337	ERR1947862	NA	21946_6#342	19	Lees et al	Netherlands	Europe	433	Sensitive	Sensitive	Sensitive	Absent	Absent	-
4484STDY6632503	ERS1460706	ERR1947499	NA	21903_8#345	19	Lees et al	Netherlands	Europe	433	Sensitive	Sensitive	Sensitive	Absent	Absent	-
2842STDY5644161	ERS367599	ERR461856	GCA_900020745	11893_1#30	19	Lees et al	Netherlands	Europe	433	Sensitive	Sensitive	Sensitive	Absent	Absent	-
4484STDY6808664	ERS1698591	ERR2305150	NA	22695_3#109	19	Lees et al	Netherlands	Europe	433	Sensitive	Sensitive	Sensitive	Absent	Absent	-
2842STDY5753092	ERS408877	ERR554838	GCA_900020755	12673_6#7	19	Lees et al	Netherlands	Europe	433	Sensitive	Sensitive	Sensitive	Absent	Absent	-
2842STDY5644082	ERS367521	ERR461514	GCA_900023525	11861_2#49	19	Lees et al	Netherlands	Europe	433	Sensitive	Sensitive	Sensitive	Absent	Absent	-
4484STDY6632479	ERS1460682	ERR1947475	NA	21903_8#321	19	Lees et al	Netherlands	Europe	433~	Sensitive	Sensitive	Sensitive	Absent	Absent	-
4484STDY6632642	ERS1461692	ERR1947634	NA	21946_6#114	19	Lees et al	Netherlands	Europe	433	Sensitive	Sensitive	Sensitive	Absent	Absent	-
2842STDY5643760	ERS367202	ERR461026	GCA_900020575	11860_5#21	19	Lees et al	Netherlands	Europe	433	Sensitive	Sensitive	Sensitive	Absent	Absent	-
4484STDY6632063	ERS1460272	ERR1947797	NA	21946_6#277	19	Lees et al	Netherlands	Europe	433	Sensitive	Sensitive	Sensitive	Absent	Absent	-
4484STDY6632293	ERS1460499	ERR1947293	NA	21903_8#139	19	Lees et al	Netherlands	Europe	433	Sensitive	Sensitive	Sensitive	Absent	Absent	-
2842STDY5644190	ERS367628	ERR461882	GCA_900023775	11893_1#58	19	Lees et al	Netherlands	Europe	433	Sensitive	Sensitive	Sensitive	Absent	Absent	-
2842STDY5644351	ERS367787	ERR461673	NA	11861_4#27	19	Lees et al	Netherlands	Europe	433	Sensitive	Sensitive	Sensitive	Absent	Absent	-
2842STDY5643659	ERS367102	ERR460931	GCA_900034005	11860_4#15	19	Lees et al	Netherlands	Europe	433	Sensitive	Sensitive	Sensitive	Absent	Absent	-
2842STDY5753116	ERS408901	ERR554862	GCA_900030035	12673_6#31	19	Lees et al	Netherlands	Europe	9168	Sensitive	Sensitive	Sensitive	Absent	Absent	-
4484STDY6808671	ERS1698598	ERR2305157	NA	22695_3#116	19	Lees et al	Netherlands	Europe	433	Sensitive	Sensitive	Sensitive	Absent	Absent	-
2842STDY5644598	ERS368028	ERR461366	NA	11860_8#84	19	Lees et al	Netherlands	Europe	433	Sensitive	Sensitive	Sensitive	Absent	Absent	-
2842STDY5643785	ERS367227	ERR461049	NA	11860_5#46	19	Lees et al	Netherlands	Europe	433	Sensitive	Sensitive	Sensitive	Absent	Absent	-
2842STDY5644032	ERS367471	ERR461466	NA	11861_1#93	19	Lees et al	Netherlands	Europe	433	Sensitive	Sensitive	Sensitive	Absent	Absent	-
2842STDY5644326	ERS367762	ERR461648	GCA_900025895	11861_4#1	19	Lees et al	Netherlands	Europe	433	Sensitive	Sensitive	NA	Absent	Absent	-
4484STDY6632288	ERS1460494	ERR1947288	NA	21903_8#134	19	Lees et al	Netherlands	Europe	433	Sensitive	Sensitive	Sensitive	Absent	Absent	-
2842STDY5643943	ERS367383	ERR461386	NA	11861_1#9	19	Lees et al	Netherlands	Europe	433	Sensitive	Sensitive	Sensitive	Absent	Absent	-
2842STDY5753120	ERS408905	ERR554866	NA	12673_6#35	19	Lees et al	Netherlands	Europe	433	Sensitive	Sensitive	Sensitive	Absent	Absent	-
2842STDY5644209	ERS367647	ERR461900	GCA_900034035	11893_1#76	19	Lees et al	Netherlands	Europe	433	Sensitive	Sensitive	Sensitive	Absent	Absent	-
2842STDY5643950	ERS367390	ERR461393	GCA_900017415	11861_1#16	19	Lees et al	Netherlands	Europe	819	Sensitive	Sensitive	Sensitive	Absent	Absent	-
4484STDY6632413	ERS1460618	ERR1947411	NA	21903_8#257	19	Lees et al	Netherlands	Europe	433	Sensitive	Sensitive	Sensitive	Absent	Absent	-
2842STDY5644246	ERS367683	ERR461570	GCA_900022835	11861_3#17	19	Lees et al	Netherlands	Europe	433	Sensitive	Sensitive	Sensitive	Absent	Absent	-
2842STDY5643671	ERS367114	ERR460943	GCA_900039325	11860_4#27	19	Lees et al	Netherlands	Europe	433	Sensitive	Sensitive	Sensitive	Absent	Absent	-
4484STDY6808764	ERS1698690	ERR2305574	NA	23495_7#18	19	Lees et al	Netherlands	Europe	433	Sensitive	Sensitive	Sensitive	Absent	Absent	-
4484STDY6632582	ERS1460784	ERR1947576	NA	21946_6#56	19	Lees et al	Netherlands	Europe	433	Sensitive	Sensitive	Sensitive	Absent	Absent	-
2842STDY5644077	ERS367516	ERR461509	GCA_900047025	11861_2#44	19	Lees et al	Netherlands	Europe	433	Sensitive	Sensitive	Sensitive	Absent	Absent	-
2842STDY5644201	ERS367639	ERR461892	GCA_900030525	11893_1#68	19	Lees et al	Netherlands	Europe	433	Sensitive	Sensitive	Sensitive	Absent	Absent	-
2842STDY5753119	ERS408904	ERR554865	GCA_900022865	12673_6#34	19	Lees et al	Netherlands	Europe	433	Sensitive	Sensitive	Sensitive	Absent	Absent	-
2842STDY5644660	ERS368088	ERR461788	GCA_900017305	11861_5#51	19	Lees et al	Netherlands	Europe	819	Sensitive	Sensitive	Sensitive	Absent	Absent	-
2842STDY5644188	ERS367626	ERR461881	GCA_900040005	11893_1#57	19	Lees et al	Netherlands	Europe	433	Sensitive	Sensitive	Sensitive	Absent	Absent	-
4484STDY6632060	ERS1460269	ERR1947794	NA	21946_6#274	19	Lees et al	Netherlands	Europe	433	Sensitive	Sensitive	Sensitive	Absent	Absent	-
2842STDY5644283	ERS367720	ERR461607	GCA_900024055	11861_3#56	19	Lees et al	Netherlands	Europe	433	Sensitive	Sensitive	Sensitive	Absent	Absent	-
2842STDY5753095	ERS408880	ERR554841	GCA_900037135	12673_6#10	19	Lees et al	Netherlands	Europe	433	Sensitive	Sensitive	Sensitive	Absent	Absent	-
4484STDY6632103	ERS1460312	ERR1947837	NA	21946_6#317	19	Lees et al	Netherlands	Europe	433	Sensitive	Sensitive	Sensitive	Absent	Absent	-
2842STDY5644007	ERS367447	ERR461448	GCA_900023465	11861_1#73	19	Lees et al	Netherlands	Europe	433	Sensitive	Sensitive	Sensitive	Absent	Absent	-
2842STDY5643834	ERS367276	ERR461097	NA	11860_5#94	19	Lees et al	Netherlands	Europe	433	Sensitive	Sensitive	Sensitive	Absent	Absent	-
2842STDY5644236	ERS367673	ERR461560	NA	11861_3#6	19	Lees et al	Netherlands	Europe	433	Sensitive	Sensitive	Sensitive	Absent	Absent	-
4484STDY6808541	ERS1698470	ERR2305450	NA	22709_8#363	19	Lees et al	Netherlands	Europe	433	Sensitive	Sensitive	Sensitive	Absent	Absent	-
4484STDY6808789	ERS1698715	ERR2305599	NA	23495_7#43	19	Lees et al	Netherlands	Europe	433	Sensitive	Sensitive	Sensitive	Absent	Absent	-
4484STDY6808617	ERS1698545	ERR2305104	NA	22695_3#63	19	Lees et al	Netherlands	Europe	433	Sensitive	Sensitive	Sensitive	Absent	Absent	-
2842STDY5643898	ERS367339	ERR461157	NA	11860_6#61	19	Lees et al	Netherlands	Europe	433	Sensitive	Sensitive	Sensitive	Absent	Absent	-
2842STDY5643945	ERS367385	ERR461388	GCA_900023415	11861_1#11	19	Lees et al	Netherlands	Europe	433	Sensitive	Sensitive	Sensitive	Absent	Absent	-
2842STDY5643656	ERS367099	ERR460928	GCA_900046575	11860_4#12	19	Lees et al	Netherlands	Europe	819	Sensitive	Sensitive	Sensitive	Absent	Absent	-
2842STDY5644320	ERS367756	ERR461642	NA	11861_3#91	19	Lees et al	Netherlands	Europe	433	Sensitive	Sensitive	Sensitive	Absent	Absent	-
2842STDY5644227	ERS367664	ERR496941	GCA_900028785	12216_4#92	19	Lees et al	Netherlands	Europe	433	Sensitive	Sensitive	Sensitive	Absent	Absent	-
4484STDY6808879	ERS1698804	ERR2305268	NA	22695_3#227	19	Lees et al	Netherlands	Europe	433~	Sensitive	Sensitive	Sensitive	Absent	Absent	-
2842STDY5643927	ERS367368	ERR461186	NA	11860_6#90	19	Lees et al	Netherlands	Europe	433	Sensitive	Sensitive	Sensitive	Absent	Absent	-
4484STDY6809021	ERS1698945	ERR2305544	NA	22984_8#82	19	Lees et al	Netherlands	Europe	433	Sensitive	Sensitive	Sensitive	Absent	Absent	-
2842STDY5644181	ERS367619	ERR461875	GCA_900042885	11893_1#51	19	Lees et al	Netherlands	Europe	819	Sensitive	Sensitive	Sensitive	Absent	Absent	-
2842STDY5643669	ERS367112	ERR460941	GCA_900020005	11860_4#25	19	Lees et al	Netherlands	Europe	433	Sensitive	Sensitive	Sensitive	Absent	Absent	-
4484STDY6632099	ERS1460308	ERR1947833	NA	21946_6#313	19	Lees et al	Netherlands	Europe	433	Sensitive	Sensitive	Sensitive	Absent	Absent	-
4484STDY6632434	ERS1460637	ERR1947430	NA	21903_8#276	19	Lees et al	Netherlands	Europe	433	Sensitive	Sensitive	Sensitive	Absent	Absent	-
2842STDY5643967	ERS367407	ERR461409	GCA_900023935	11861_1#33	19	Lees et al	Netherlands	Europe	433	Sensitive	Sensitive	Sensitive	Absent	Absent	-
4484STDY6808890	ERS1698815	ERR2305279	NA	22695_3#238	19	Lees et al	Netherlands	Europe	433~	Sensitive	Sensitive	Sensitive	Absent	Absent	-
2842STDY5644122	ERS367561	ERR461553	GCA_900042855	11861_2#88	19	Lees et al	Netherlands	Europe	433	Sensitive	Sensitive	Sensitive	Absent	Absent	-
4484STDY6809069	ERS1698992	ERR2305361	NA	22695_3#320	19	Lees et al	Netherlands	Europe	433	Sensitive	Sensitive	Sensitive	Absent	Absent	-
2842STDY5643851	ERS367292	ERR461111	GCA_900027525	11860_6#13	19	Lees et al	Netherlands	Europe	433	Sensitive	Sensitive	Sensitive	Absent	Absent	-
2842STDY5644242	ERS367679	ERR461566	NA	11861_3#13	19	Lees et al	Netherlands	Europe	433	Sensitive	Sensitive	Sensitive	Absent	Absent	-
4484STDY6809026	ERS1698950	ERR2305549	NA	22984_8#87	19	Lees et al	Netherlands	Europe	433	Sensitive	Sensitive	Sensitive	Absent	Absent	-
2842STDY5644281	ERS367718	ERR461605	GCA_900019605	11861_3#54	19	Lees et al	Netherlands	Europe	433	Sensitive	Sensitive	Sensitive	Absent	Absent	-
4484STDY6632292	ERS1460498	ERR1947292	NA	21903_8#138	19	Lees et al	Netherlands	Europe	433	Sensitive	Sensitive	Sensitive	Absent	Absent	-
2842STDY5753134	ERS408919	ERR554880	NA	12673_6#49	19	Lees et al	Netherlands	Europe	433	Sensitive	Sensitive	Sensitive	Absent	Absent	-
2842STDY5644238	ERS367675	ERR461562	NA	11861_3#9	19	Lees et al	Netherlands	Europe	433	Sensitive	Sensitive	Sensitive	Absent	Absent	-
4484STDY6632112	ERS1460321	ERR1947846	NA	21946_6#326	19	Lees et al	Netherlands	Europe	819	Sensitive	Sensitive	Sensitive	Absent	Absent	-
2842STDY5643884	ERS367325	ERR461144	NA	11860_6#48	19	Lees et al	Netherlands	Europe	433	Sensitive	Sensitive	Sensitive	Absent	Absent	-
4484STDY6808674	ERS1698601	ERR2305160	NA	22695_3#119	19	Lees et al	Netherlands	Europe	433	Sensitive	Sensitive	Sensitive	Absent	Absent	-
2842STDY5644120	ERS367559	ERR461551	GCA_900019545	11861_2#86	19	Lees et al	Netherlands	Europe	433	Sensitive	Sensitive	Sensitive	Absent	Absent	-
4484STDY6632138	ERS1460345	ERR1947870	NA	21946_6#350	19	Lees et al	Netherlands	Europe	433	Sensitive	Sensitive	Sensitive	Absent	Absent	-
4484STDY6808648	ERS1698576	ERR2305135	NA	22695_3#94	19	Lees et al	Netherlands	Europe	433	Sensitive	Sensitive	Sensitive	Absent	Absent	-
2842STDY5643979	ERS367419	ERR461420	GCA_900020075	11861_1#45	19	Lees et al	Netherlands	Europe	433	Sensitive	Sensitive	Sensitive	Absent	Absent	-
4484STDY6808649	ERS1698577	ERR2305136	NA	22695_3#95	19	Lees et al	Netherlands	Europe	433	Sensitive	Sensitive	Sensitive	Absent	Absent	-
4484STDY6631970	ERS1460180	ERR1947706	NA	21946_6#186	19	Lees et al	Netherlands	Europe	433	Sensitive	Sensitive	Sensitive	Absent	Absent	-
2842STDY5644170	ERS367608	ERR461864	GCA_900023765	11893_1#39	19	Lees et al	Netherlands	Europe	433	Sensitive	Sensitive	Sensitive	Absent	Absent	-
2842STDY5643896	ERS367337	ERR461155	GCA_900047655	11860_6#59	23	Lees et al	Netherlands	Europe	273	Sensitive	Sensitive	Sensitive	Absent	Present	-
2842STDY5881850	ERS515105	ERR716146	NA	14355_8#63	23	Lees et al	Netherlands	Europe	273	Sensitive	Sensitive	Sensitive	Absent	Absent	-
2842STDY5643871	ERS367312	ERR461131	NA	11860_6#34	24	Lees et al	Netherlands	Europe	138	Sensitive	Sensitive	Sensitive	Absent	Absent	-
4484STDY6632409	ERS1460614	ERR1947407	NA	21903_8#253	24	Lees et al	Netherlands	Europe	176	Sensitive	Sensitive	Sensitive	Absent	Absent	-
4484STDY6632372	ERS1460577	ERR1947370	NA	21903_8#216	24	Lees et al	Netherlands	Europe	176	Sensitive	Sensitive	Sensitive	Absent	Absent	-
2842STDY5643748	ERS367190	ERR461014	NA	11860_5#9	24	Lees et al	Netherlands	Europe	138	Resistant	Resistant	Sensitive	Absent	Present	-
2842STDY5753812	ERS409590	ERR563998	GCA_900023665	12754_4#55	24	Lees et al	Netherlands	Europe	138	Sensitive	Sensitive	Sensitive	Absent	Absent	-
4484STDY6808893	ERS1698818	ERR2305282	NA	22695_3#241	24	Lees et al	Netherlands	Europe	176	Sensitive	Sensitive	Sensitive	Absent	Absent	-
4484STDY6808607	ERS1698535	ERR2305094	NA	22695_3#53	24	Lees et al	Netherlands	Europe	176	Sensitive	Sensitive	Sensitive	Absent	Absent	-
2842STDY5643842	ERS367283	ERR461104	GCA_900046675	11860_6#5	24	Lees et al	Netherlands	Europe	176	Sensitive	Sensitive	Sensitive	Absent	Absent	-
2842STDY5644457	ERS367888	ERR461226	GCA_900020705	11860_7#36	24	Lees et al	Netherlands	Europe	176	Sensitive	Sensitive	Sensitive	Absent	Absent	-
2842STDY5643854	ERS367295	ERR461114	GCA_900018475	11860_6#16	24	Lees et al	Netherlands	Europe	138	Sensitive	Sensitive	Sensitive	Absent	Absent	-
2842STDY5643848	ERS367289	ERR461109	NA	11860_6#11	24	Lees et al	Netherlands	Europe	176	Sensitive	Sensitive	Sensitive	Absent	Absent	-
4484STDY6632101	ERS1460310	ERR1947835	NA	21946_6#315	24	Lees et al	Netherlands	Europe	176	Sensitive	Sensitive	Sensitive	Absent	Absent	-
2842STDY5644383	ERS367819	ERR461705	NA	11861_4#61	24	Lees et al	Netherlands	Europe	176	Sensitive	Sensitive	Sensitive	Absent	Absent	-
2842STDY5644438	ERS367870	ERR461208	GCA_900021675	11860_7#17	24	Lees et al	Netherlands	Europe	176	Sensitive	Sensitive	Sensitive	Absent	Absent	-
2842STDY5644465	ERS367896	ERR461234	NA	11860_7#45	24	Lees et al	Netherlands	Europe	176	Sensitive	Sensitive	Sensitive	Absent	Absent	-
2842STDY5644047	ERS367486	ERR461480	GCA_900027565	11861_2#13	24	Lees et al	Netherlands	Europe	176	Sensitive	Sensitive	Sensitive	Absent	Absent	-
2842STDY5643844	ERS367285	ERR461105	GCA_900023315	11860_6#6	24	Lees et al	Netherlands	Europe	176	Sensitive	Sensitive	Sensitive	Absent	Absent	-
4484STDY6808836	ERS1698762	ERR2305645	NA	23495_7#89	24	Lees et al	Netherlands	Europe	176	Sensitive	Sensitive	Sensitive	Absent	Absent	-
4484STDY6632146	ERS1460353	ERR1947878	NA	21946_6#358	24	Lees et al	Netherlands	Europe	176	Sensitive	Sensitive	Sensitive	Absent	Absent	-
4484STDY6632439	ERS1460642	ERR1947435	NA	21903_8#281	24	Lees et al	Netherlands	Europe	176	Sensitive	Sensitive	Sensitive	Absent	Absent	-
4484STDY6632097	ERS1460306	ERR1947831	NA	21946_6#311	24	Lees et al	Netherlands	Europe	176	Sensitive	Sensitive	Sensitive	Absent	Absent	-
4484STDY6808469	ERS1698398	ERR2305378	NA	22709_8#291	24	Lees et al	Netherlands	Europe	170~	Sensitive	Sensitive	Sensitive	Absent	Absent	-
4484STDY6632162	ERS1460369	ERR1947164	NA	21903_8#10	24	Lees et al	Netherlands	Europe	138	Resistant	Resistant	Sensitive	Absent	Present	-
4484STDY6632393	ERS1460598	ERR1947391	NA	21903_8#237	24	Lees et al	Netherlands	Europe	138	Sensitive	Resistant	Sensitive	Absent	Absent	-
4484STDY6808523	ERS1698445	ERR2305432	NA	22709_8#345	24	Lees et al	Netherlands	Europe	176	Sensitive	Sensitive	Sensitive	Absent	Absent	-
2842STDY5644403	ERS367837	ERR461723	NA	11861_4#79	24	Lees et al	Netherlands	Europe	176	Resistant	Sensitive	Sensitive	Absent	Absent	-
4484STDY6632086	ERS1460295	ERR1947820	NA	21946_6#300	24	Lees et al	Netherlands	Europe	176	Sensitive	Sensitive	Sensitive	Absent	Absent	-
2842STDY5881933	ERS515191	ERR716227	NA	14412_3#50	24	Lees et al	Netherlands	Europe	176	Sensitive	Sensitive	Sensitive	Absent	Absent	-
2842STDY5643814	ERS367256	ERR461077	GCA_900047635	11860_5#74	24	Lees et al	Netherlands	Europe	176	Sensitive	Sensitive	Sensitive	Absent	Absent	-
2842STDY5644389	ERS367824	ERR461710	GCA_900020165	11861_4#66	24	Lees et al	Netherlands	Europe	176	Sensitive	Sensitive	Sensitive	Absent	Absent	-
4484STDY6632402	ERS1460607	ERR1947400	NA	21903_8#246	24	Lees et al	Netherlands	Europe	176	Sensitive	Resistant	Sensitive	Absent	Absent	-
4484STDY6632174	ERS1460381	ERR1947176	NA	21903_8#22	24	Lees et al	Netherlands	Europe	176	Sensitive	Sensitive	Sensitive	Absent	Absent	-
4484STDY6632403	ERS1460608	ERR1947401	NA	21903_8#247	24	Lees et al	Netherlands	Europe	176	Sensitive	Sensitive	Sensitive	Absent	Absent	-
2842STDY5644672	ERS368100	ERR461800	NA	11861_5#63	24	Lees et al	Netherlands	Europe	138	Sensitive	Sensitive	Sensitive	Absent	Absent	-
4484STDY6632176	ERS1460383	ERR1947178	NA	21903_8#24	24	Lees et al	Netherlands	Europe	171~	Sensitive	Sensitive	Sensitive	Absent	Absent	-
2842STDY5643861	ERS367302	ERR461121	NA	11860_6#23	24	Lees et al	Netherlands	Europe	12955	Sensitive	Sensitive	Sensitive	Absent	Absent	-
2842STDY5643907	ERS367348	ERR461166	NA	11860_6#70	24	Lees et al	Netherlands	Europe	176	Sensitive	Resistant	Sensitive	Absent	Absent	-
2842STDY5644680	ERS368108	ERR461808	GCA_900035315	11861_5#71	24	Lees et al	Netherlands	Europe	176	Sensitive	Sensitive	Sensitive	Absent	Absent	-
2842STDY5643697	ERS367140	ERR460969	NA	11860_4#55	24	Lees et al	Netherlands	Europe	176	Sensitive	Sensitive	Sensitive	Absent	Absent	-
2842STDY5644658	ERS368086	ERR461786	GCA_900023875	11861_5#49	24	Lees et al	Netherlands	Europe	176	Sensitive	Sensitive	Sensitive	Absent	Absent	-
2842STDY5644447	ERS367879	ERR461217	NA	11860_7#26	24	Lees et al	Netherlands	Europe	176	Sensitive	Sensitive	Sensitive	Absent	Absent	-
4484STDY6632650	ERS1461700	ERR1947642	NA	21946_6#122	24	Lees et al	Netherlands	Europe	176	Sensitive	Sensitive	Sensitive	Absent	Absent	-
4484STDY6632278	ERS1460484	ERR1947278	NA	21903_8#124	24	Lees et al	Netherlands	Europe	176	Sensitive	Sensitive	Sensitive	Absent	Absent	-
2842STDY5643783	ERS367225	ERR461047	NA	11860_5#44	24	Lees et al	Netherlands	Europe	176	Sensitive	Sensitive	Sensitive	Absent	Absent	-
2842STDY5644002	ERS367442	ERR461443	NA	11861_1#68	24	Lees et al	Netherlands	Europe	176	Sensitive	Sensitive	Sensitive	Absent	Absent	-
4484STDY6632161	ERS1460368	ERR1947163	NA	21903_8#9	24	Lees et al	Netherlands	Europe	138	Resistant	Resistant	Sensitive	Absent	Present	-
2842STDY5644252	ERS367689	ERR461576	GCA_900019575	11861_3#23	24	Lees et al	Netherlands	Europe	176	Sensitive	Sensitive	Sensitive	Absent	Absent	-
2842STDY5643667	ERS367110	ERR460939	NA	11860_4#23	24	Lees et al	Netherlands	Europe	176	Sensitive	Sensitive	Sensitive	Absent	Absent	-
4484STDY6632275	ERS1460481	ERR1947275	NA	21903_8#121	24	Lees et al	Netherlands	Europe	176	Sensitive	Sensitive	Sensitive	Absent	Absent	-
2842STDY5643682	ERS367125	ERR460954	GCA_900028165	11860_4#39	24	Lees et al	Netherlands	Europe	176	Sensitive	Sensitive	Sensitive	Absent	Absent	-
4484STDY6632296	ERS1460502	ERR1947296	NA	21903_8#142	24	Lees et al	Netherlands	Europe	176	Sensitive	Sensitive	Sensitive	Absent	Absent	-
2842STDY5644406	ERS367840	ERR461726	GCA_900023635	11861_4#82	24	Lees et al	Netherlands	Europe	176	Sensitive	Sensitive	Sensitive	Absent	Absent	-
2842STDY5643729	ERS367172	ERR485959	GCA_900021415	12045_8#81	24	Lees et al	Netherlands	Europe	176	Sensitive	Sensitive	Sensitive	Absent	Absent	-
2842STDY5643778	ERS367220	ERR461042	NA	11860_5#38	24	Lees et al	Netherlands	Europe	176	Sensitive	Sensitive	Sensitive	Absent	Absent	-
2842STDY5643668	ERS367111	ERR460940	NA	11860_4#24	24	Lees et al	Netherlands	Europe	176	Sensitive	Sensitive	Sensitive	Absent	Absent	-
4484STDY6632708	ERS1461757	ERR1947698	NA	21946_6#178	24	Lees et al	Netherlands	Europe	176	Sensitive	Sensitive	Sensitive	Absent	Absent	-
2842STDY5644545	ERS367975	ERR461313	GCA_900024495	11860_8#29	24	Lees et al	Netherlands	Europe	176	Sensitive	Sensitive	Sensitive	Absent	Absent	-
2842STDY5644620	ERS368049	ERR461749	NA	11861_5#10	24	Lees et al	Netherlands	Europe	176	Sensitive	Sensitive	Sensitive	Absent	Absent	-
4484STDY6808717	ERS1698644	ERR2305203	NA	22695_3#162	24	Lees et al	Netherlands	Europe	176	Sensitive	Sensitive	Sensitive	Absent	Absent	-
4484STDY6808787	ERS1698713	ERR2305597	NA	23495_7#41	24	Lees et al	Netherlands	Europe	176	Sensitive	Sensitive	Sensitive	Absent	Absent	-
2842STDY5644052	ERS367491	ERR461485	GCA_900017725	11861_2#18	24	Lees et al	Netherlands	Europe	176	Sensitive	Sensitive	Sensitive	Absent	Absent	-
4484STDY6632192	ERS1460399	ERR1947194	NA	21903_8#40	24	Lees et al	Netherlands	Europe	138	Resistant	Resistant	Sensitive	Absent	Present	-
2842STDY5644606	ERS368035	ERR461373	NA	11860_8#91	24	Lees et al	Netherlands	Europe	176	Sensitive	Sensitive	Sensitive	Absent	Absent	-
2842STDY5643713	ERS367156	ERR460984	NA	11860_4#71	24	Lees et al	Netherlands	Europe	176	Sensitive	Sensitive	Sensitive	Absent	Absent	-
2842STDY5644569	ERS367999	ERR461337	NA	11860_8#55	24	Lees et al	Netherlands	Europe	2657	Sensitive	Resistant	Sensitive	Absent	Absent	-
2842STDY5644417	ERS367850	ERR461736	NA	11861_4#92	24	Lees et al	Netherlands	Europe	138	Sensitive	Sensitive	Sensitive	Absent	Absent	-
2842STDY5644165	ERS367603	ERR461859	NA	11893_1#34	26	Lees et al	Netherlands	Europe	989	Resistant	Resistant	Sensitive	Absent	Present	-
2842STDY5643770	ERS367212	ERR461035	GCA_900046625	11860_5#30	26	Lees et al	Netherlands	Europe	989	Resistant	Resistant	Sensitive	Absent	Present	-
2842STDY5644687	ERS368115	ERR461815	NA	11861_5#78	27	Lees et al	Netherlands	Europe	246	Sensitive	Sensitive	Sensitive	Absent	Absent	-
2842STDY5881915	ERS515170	ERR716210	GCA_900025945	14412_3#33	27	Lees et al	Netherlands	Europe	205	Resistant	Sensitive	Sensitive	Absent	Absent	-
2842STDY5643779	ERS367221	ERR461043	GCA_900018905	11860_5#39	27	Lees et al	Netherlands	Europe	205	Sensitive	Sensitive	Sensitive	Absent	Absent	-
2842STDY5753109	ERS408894	ERR554855	GCA_900019615	12673_6#24	27	Lees et al	Netherlands	Europe	247	Sensitive	Sensitive	Sensitive	Absent	Absent	-
2842STDY5643647	ERS367090	ERR460919	GCA_900017825	11860_4#2	27	Lees et al	Netherlands	Europe	246	Sensitive	Sensitive	Sensitive	Absent	Absent	-
2842STDY5644217	ERS367655	ERR461907	GCA_900034045	11893_1#84	27	Lees et al	Netherlands	Europe	246	Sensitive	Sensitive	Sensitive	Absent	Absent	-
2842STDY5644423	ERS367856	ERR461194	NA	11860_7#2	27	Lees et al	Netherlands	Europe	205	Sensitive	Sensitive	Sensitive	Absent	Absent	-
2842STDY5644349	ERS367785	ERR461671	GCA_900037155	11861_4#25	27	Lees et al	Netherlands	Europe	205	Sensitive	Sensitive	Sensitive	Absent	Absent	-
2842STDY5644483	ERS367914	ERR461252	GCA_900031755	11860_7#63	27	Lees et al	Netherlands	Europe	246	Sensitive	Sensitive	Sensitive	Absent	Absent	-
2842STDY5644502	ERS367933	ERR461271	GCA_900023265	11860_7#82	27	Lees et al	Netherlands	Europe	205	Sensitive	Sensitive	Sensitive	Absent	Absent	-
2842STDY5644590	ERS368020	ERR461358	GCA_900021325	11860_8#76	27	Lees et al	Netherlands	Europe	247	Sensitive	Sensitive	Sensitive	Absent	Absent	-
2842STDY5644038	ERS367477	ERR461471	GCA_900024595	11861_2#3	27	Lees et al	Netherlands	Europe	205	Sensitive	Sensitive	Sensitive	Absent	Absent	-
2842STDY5644148	ERS367586	ERR461844	NA	11893_1#17	27	Lees et al	Netherlands	Europe	205	Sensitive	Sensitive	Sensitive	Absent	Absent	-
2842STDY5644612	ERS368041	ERR461741	GCA_900044075	11861_5#1	27	Lees et al	Netherlands	Europe	205	Sensitive	Sensitive	Sensitive	Absent	Absent	-
4484STDY6808479	ERS1698408	ERR2305388	NA	22709_8#301	27	Lees et al	Netherlands	Europe	205	Sensitive	Sensitive	Sensitive	Absent	Absent	-
2842STDY5644410	ERS367844	ERR461730	GCA_900040635	11861_4#86	27	Lees et al	Netherlands	Europe	247	Sensitive	Sensitive	Sensitive	Absent	Absent	-
2842STDY5643735	ERS367178	ERR461003	GCA_900026445	11860_4#92	27	Lees et al	Netherlands	Europe	205	Sensitive	Sensitive	Sensitive	Absent	Absent	-
2842STDY5643676	ERS367119	ERR460948	NA	11860_4#33	27	Lees et al	Netherlands	Europe	205	Sensitive	Sensitive	Sensitive	Absent	Absent	-
2842STDY5643881	ERS367322	ERR461141	NA	11860_6#45	27	Lees et al	Netherlands	Europe	205	Sensitive	Sensitive	Sensitive	Absent	Absent	-
2842STDY5644688	ERS368116	ERR461816	NA	11861_5#79	27	Lees et al	Netherlands	Europe	247	Sensitive	Sensitive	Sensitive	Absent	Absent	-
2842STDY5644033	ERS367472	ERR461467	GCA_900022765	11861_1#94	27	Lees et al	Netherlands	Europe	205	Sensitive	Sensitive	Sensitive	Absent	Absent	-
2842STDY5643721	ERS367164	ERR460991	GCA_900022155	11860_4#79	27	Lees et al	Netherlands	Europe	247	Sensitive	Sensitive	Sensitive	Absent	Absent	-
2842STDY5644387	ERS367822	ERR461708	GCA_900023675	11861_4#64	27	Lees et al	Netherlands	Europe	205	Sensitive	Sensitive	Sensitive	Absent	Absent	-
2842STDY5644478	ERS367909	ERR461247	GCA_900024635	11860_7#58	27	Lees et al	Netherlands	Europe	205	Sensitive	Sensitive	Sensitive	Absent	Absent	-
2842STDY5643954	ERS367394	ERR461396	GCA_900024895	11861_1#19	27	Lees et al	Netherlands	Europe	205	Sensitive	Sensitive	Sensitive	Absent	Absent	-
2842STDY5644028	ERS367468	ERR461463	NA	11861_1#90	27	Lees et al	Netherlands	Europe	205	Sensitive	Sensitive	Sensitive	Absent	Absent	-
2842STDY5644656	ERS368085	ERR461785	GCA_900025085	11861_5#48	27	Lees et al	Netherlands	Europe	205	Sensitive	Sensitive	Sensitive	Absent	Absent	-
2842STDY5644559	ERS367989	ERR461327	NA	11860_8#45	27	Lees et al	Netherlands	Europe	205	Sensitive	Sensitive	Sensitive	Absent	Absent	-
2842STDY5644562	ERS367992	ERR461330	GCA_900046525	11860_8#48	27	Lees et al	Netherlands	Europe	205	Sensitive	Sensitive	Sensitive	Absent	Absent	-
2842STDY5881950	ERS515225	ERR716244	GCA_900026555	14412_3#67	27	Lees et al	Netherlands	Europe	205	Sensitive	Sensitive	Sensitive	Absent	Absent	-
2842STDY5881903	ERS515158	ERR716199	GCA_900047715	14412_3#21	27	Lees et al	Netherlands	Europe	205	Sensitive	Sensitive	Sensitive	Absent	Absent	-
2842STDY5643670	ERS367113	ERR460942	GCA_900018445	11860_4#26	27	Lees et al	Netherlands	Europe	246	Sensitive	Sensitive	Sensitive	Absent	Absent	-
2842STDY5643866	ERS367307	ERR461126	NA	11860_6#28	27	Lees et al	Netherlands	Europe	246	Sensitive	Sensitive	Sensitive	Absent	Absent	-
2842STDY5753111	ERS408896	ERR554857	GCA_900027195	12673_6#26	27	Lees et al	Netherlands	Europe	205	Sensitive	Sensitive	Sensitive	Absent	Absent	-
2842STDY5644050	ERS367489	ERR461483	GCA_900019515	11861_2#16	27	Lees et al	Netherlands	Europe	205	Sensitive	Sensitive	Sensitive	Absent	Absent	-
4484STDY6808505	ERS1698434	ERR2305414	NA	22709_8#327	27	Lees et al	Netherlands	Europe	246~	Sensitive	Sensitive	Sensitive	Absent	Absent	-
2842STDY5644564	ERS367994	ERR461332	GCA_900046915	11860_8#50	27	Lees et al	Netherlands	Europe	205	Sensitive	Sensitive	Sensitive	Absent	Absent	-
2842STDY5643653	ERS367096	ERR460925	GCA_900029935	11860_4#9	27	Lees et al	Netherlands	Europe	246	Sensitive	Sensitive	Sensitive	Absent	Absent	-
2842STDY5643797	ERS367239	ERR461061	GCA_900046645	11860_5#58	27	Lees et al	Netherlands	Europe	246	Sensitive	Sensitive	Sensitive	Absent	Absent	-
4484STDY6808460	ERS1698389	ERR2305369	NA	22709_8#282	27	Lees et al	Netherlands	Europe	246~	Sensitive	Sensitive	Sensitive	Absent	Absent	-
2842STDY5644542	ERS367972	ERR461310	GCA_900021225	11860_8#26	27	Lees et al	Netherlands	Europe	247	Sensitive	Sensitive	Sensitive	Absent	Absent	-
2842STDY5643875	ERS367316	ERR461135	GCA_900023375	11860_6#38	27	Lees et al	Netherlands	Europe	246	Sensitive	Sensitive	Sensitive	Absent	Absent	-
2842STDY5644491	ERS367922	ERR461260	GCA_900025785	11860_7#71	27	Lees et al	Netherlands	Europe	246	Sensitive	Sensitive	Sensitive	Absent	Absent	-
2842STDY5881945	ERS515215	ERR716239	NA	14412_3#62	27	Lees et al	Netherlands	Europe	247	Sensitive	Sensitive	Sensitive	Absent	Absent	-
2842STDY5644471	ERS367902	ERR461240	GCA_900019565	11860_7#51	27	Lees et al	Netherlands	Europe	205	Sensitive	Sensitive	Sensitive	Absent	Absent	-
[truncated: 18,606 more rows]
